# Supplementary material for: Small RNA Sequencing Based Identification of MiRNAs in Daphnia magna
Source: PLoS One. 2015 Sep 14;10(9):e0137617. doi: 10.1371/journal.pone.0137617 (PMC4569176; doi:10.1371/journal.pone.0137617)
Supplement: S1 Table — Table represents the raw data that shows the parameter values for each sequence having 90% or higher identity and 0.1 E-value. The raw data was obtained after running the blast code using 815,699 reads that remained after the clean-up process. miRNAs that show homologues in humans and model organisms (Mus musculus, Drosophila melanogaster,Caenorhabditis elegans and D. pulex) are presented. (XLSX) [file pone.0137617.s001.xlsx]

## Sheet: Raw Data
Sequence ID	MIMAT Number	Species	miRNA Family	miRNA Name	Lenght	% Identity	E-value	Hit Number
RNAseq_1	MIMAT0019539	Petromyzon marinus	miR-315	pma-miR-315	20	100	9e-06	40.1
RNAseq_1	MIMAT0018433	Nasonia longicornis	miR-315	nlo-miR-315	20	100	9e-06	40.1
RNAseq_1	MIMAT0015689	Nasonia vitripennis	miR-315	nvi-miR-315	20	100	9e-06	40.1
RNAseq_1	MIMAT0014730	Acyrthosiphon pisum	miR-315	api-miR-315	20	100	9e-06	40.1
RNAseq_1	MIMAT0014365	Culex quinquefasciatus	miR-315	cqu-miR-315	20	100	9e-06	40.1
RNAseq_1	MIMAT0014262	Aedes aegypti	miR-315-5p	aae-miR-315-5p	20	100	9e-06	40.1
RNAseq_1	MIMAT0012660	Daphnia pulex	miR-315	dpu-miR-315	20	100	9e-06	40.1
RNAseq_1	MIMAT0010096	Tribolium castaneum	miR-315	tca-miR-315	20	100	9e-06	40.1
RNAseq_1	MIMAT0009642	Saccoglossus kowalevskii	miR-315	sko-miR-315	20	100	9e-06	40.1
RNAseq_1	MIMAT0009596	Lottia gigantea	miR-315	lgi-miR-315	20	100	9e-06	40.1
RNAseq_1	MIMAT0009541	Capitella teleta	miR-315	cte-miR-315	20	100	9e-06	40.1
RNAseq_1	MIMAT0009084	Drosophila yakuba	miR-315	dya-miR-315	20	100	9e-06	40.1
RNAseq_1	MIMAT0009036	Drosophila willistoni	miR-315	dwi-miR-315	20	100	9e-06	40.1
RNAseq_1	MIMAT0008944	Drosophila virilis	miR-315a	dvi-miR-315a	20	100	9e-06	40.1
RNAseq_1	MIMAT0008870	Drosophila simulans	miR-315	dsi-miR-315	20	100	9e-06	40.1
RNAseq_1	MIMAT0008815	Drosophila sechellia	miR-315	dse-miR-315	20	100	9e-06	40.1
RNAseq_1	MIMAT0008730	Drosophila persimilis	miR-315	dpe-miR-315	20	100	9e-06	40.1
RNAseq_1	MIMAT0008687	Drosophila mojavensis	miR-315	dmo-miR-315	20	100	9e-06	40.1
RNAseq_1	MIMAT0008604	Drosophila grimshawi	miR-315	dgr-miR-315	20	100	9e-06	40.1
RNAseq_1	MIMAT0008539	Drosophila erecta	miR-315	der-miR-315	20	100	9e-06	40.1
RNAseq_1	MIMAT0008459	Drosophila ananassae	miR-315	dan-miR-315	20	100	9e-06	40.1
RNAseq_1	MIMAT0001521	Anopheles gambiae	miR-315	aga-miR-315	20	100	9e-06	40.1
RNAseq_1	MIMAT0001487	Apis mellifera	miR-315	ame-miR-315	20	100	9e-06	40.1
RNAseq_1	MIMAT0001261	Drosophila pseudoobscura	miR-315	dps-miR-315	20	100	9e-06	40.1
RNAseq_1	MIMAT0000407	Drosophila melanogaster	miR-315-5p	dme-miR-315-5p	20	100	9e-06	40.1
RNAseq_21	MIMAT0015696	Nasonia vitripennis	bantam	nvi-bantam	22	100	6e-07	44.1
RNAseq_21	MIMAT0012679	Ixodes scapularis	bantam	isc-bantam	22	100	6e-07	44.1
RNAseq_21	MIMAT0012634	Daphnia pulex	bantam	dpu-bantam	22	100	6e-07	44.1
RNAseq_21	MIMAT0010091	Tribolium castaneum	bantam-3p	tca-bantam-3p	22	100	6e-07	44.1
RNAseq_21	MIMAT0001470	Apis mellifera	bantam	ame-bantam	22	100	6e-07	44.1
RNAseq_21	MIMAT0009057	Drosophila yakuba	bantam	dya-bantam	22	95.45	0.0001	36.2
RNAseq_21	MIMAT0008985	Drosophila willistoni	bantam	dwi-bantam	22	95.45	0.0001	36.2
RNAseq_21	MIMAT0008966	Drosophila virilis	bantam	dvi-bantam	22	95.45	0.0001	36.2
RNAseq_21	MIMAT0008861	Drosophila simulans	bantam	dsi-bantam	22	95.45	0.0001	36.2
RNAseq_21	MIMAT0008775	Drosophila sechellia	bantam	dse-bantam	22	95.45	0.0001	36.2
RNAseq_21	MIMAT0008721	Drosophila persimilis	bantam	dpe-bantam	22	95.45	0.0001	36.2
RNAseq_21	MIMAT0008634	Drosophila mojavensis	bantam	dmo-bantam	22	95.45	0.0001	36.2
RNAseq_21	MIMAT0008559	Drosophila grimshawi	bantam	dgr-bantam	22	95.45	0.0001	36.2
RNAseq_21	MIMAT0008533	Drosophila erecta	bantam	der-bantam	22	95.45	0.0001	36.2
RNAseq_21	MIMAT0008409	Drosophila ananassae	bantam	dan-bantam	22	95.45	0.0001	36.2
RNAseq_21	MIMAT0001197	Drosophila pseudoobscura	bantam	dps-bantam	22	95.45	0.0001	36.2
RNAseq_21	MIMAT0000365	Drosophila melanogaster	bantam-3p	dme-bantam-3p	22	95.45	0.0001	36.2
RNAseq_21	MIMAT0014219	Aedes aegypti	bantam-3p	aae-bantam-3p	21	95.24	0.0006	34.2
RNAseq_21	MIMAT0001494	Anopheles gambiae	bantam	aga-bantam	22	90.91	0.035	28.2
RNAseq_25	MIMAT0012655	Daphnia pulex	miR-281	dpu-miR-281	20	95	0.002	32.2
RNAseq_40	MIMAT0024440	Manduca sexta	miR-276	mse-miR-276	22	100	6e-07	44.1
RNAseq_40	MIMAT0018430	Nasonia longicornis	miR-276	nlo-miR-276	22	100	6e-07	44.1
RNAseq_40	MIMAT0018406	Nasonia giraulti	miR-276	ngi-miR-276	22	100	6e-07	44.1
RNAseq_40	MIMAT0015687	Nasonia vitripennis	miR-276	nvi-miR-276	22	100	6e-07	44.1
RNAseq_40	MIMAT0014393	Culex quinquefasciatus	miR-276-3p	cqu-miR-276-3p	22	100	6e-07	44.1
RNAseq_40	MIMAT0014133	Acyrthosiphon pisum	miR-276	api-miR-276	22	100	6e-07	44.1
RNAseq_40	MIMAT0012652	Daphnia pulex	miR-276	dpu-miR-276	22	100	6e-07	44.1
RNAseq_40	MIMAT0010139	Locusta migratoria	miR-276-3p	lmi-miR-276-3p	22	100	6e-07	44.1
RNAseq_40	MIMAT0009117	Drosophila yakuba	miR-276a	dya-miR-276a	22	100	6e-07	44.1
RNAseq_40	MIMAT0009008	Drosophila willistoni	miR-276a-3p	dwi-miR-276a-3p	22	100	6e-07	44.1
RNAseq_40	MIMAT0008943	Drosophila virilis	miR-276a	dvi-miR-276a	22	100	6e-07	44.1
RNAseq_40	MIMAT0008892	Drosophila simulans	miR-276a	dsi-miR-276a	22	100	6e-07	44.1
RNAseq_40	MIMAT0008791	Drosophila sechellia	miR-276a	dse-miR-276a	22	100	6e-07	44.1
RNAseq_40	MIMAT0008705	Drosophila persimilis	miR-276a	dpe-miR-276a	22	100	6e-07	44.1
RNAseq_40	MIMAT0008654	Drosophila mojavensis	miR-276a	dmo-miR-276a	22	100	6e-07	44.1
RNAseq_40	MIMAT0008576	Drosophila grimshawi	miR-276a-3p	dgr-miR-276a-3p	22	100	6e-07	44.1
RNAseq_40	MIMAT0008529	Drosophila erecta	miR-276a	der-miR-276a	22	100	6e-07	44.1
RNAseq_40	MIMAT0008455	Drosophila ananassae	miR-276a	dan-miR-276a	22	100	6e-07	44.1
RNAseq_40	MIMAT0008381	Tribolium castaneum	miR-276-3p	tca-miR-276-3p	22	100	6e-07	44.1
RNAseq_40	MIMAT0015232	Bombyx mori	miR-276-3p	bmo-miR-276-3p	22	100	6e-07	44.1
RNAseq_40	MIMAT0006782	Anopheles gambiae	miR-276-3p	aga-miR-276-3p	22	100	6e-07	44.1
RNAseq_40	MIMAT0001480	Apis mellifera	miR-276	ame-miR-276	22	100	6e-07	44.1
RNAseq_40	MIMAT0001239	Drosophila pseudoobscura	miR-276a	dps-miR-276a	22	100	6e-07	44.1
RNAseq_40	MIMAT0000337	Drosophila melanogaster	miR-276a-3p	dme-miR-276a-3p	22	100	6e-07	44.1
RNAseq_40	MIMAT0014223	Aedes aegypti	miR-276-3p	aae-miR-276-3p	21	100	2e-06	42.1
RNAseq_40	MIMAT0009125	Drosophila yakuba	miR-276b	dya-miR-276b	22	95.45	0.0001	36.2
RNAseq_40	MIMAT0009019	Drosophila willistoni	miR-276b-3p	dwi-miR-276b-3p	22	95.45	0.0001	36.2
RNAseq_40	MIMAT0008942	Drosophila virilis	miR-276b	dvi-miR-276b	22	95.45	0.0001	36.2
RNAseq_40	MIMAT0008895	Drosophila simulans	miR-276b	dsi-miR-276b	22	95.45	0.0001	36.2
RNAseq_40	MIMAT0008778	Drosophila sechellia	miR-276b	dse-miR-276b	22	95.45	0.0001	36.2
RNAseq_40	MIMAT0008750	Drosophila persimilis	miR-276b	dpe-miR-276b	22	95.45	0.0001	36.2
RNAseq_40	MIMAT0008631	Drosophila mojavensis	miR-276b	dmo-miR-276b	22	95.45	0.0001	36.2
RNAseq_40	MIMAT0008574	Drosophila grimshawi	miR-276b-3p	dgr-miR-276b-3p	22	95.45	0.0001	36.2
RNAseq_40	MIMAT0008542	Drosophila erecta	miR-276b	der-miR-276b	22	95.45	0.0001	36.2
RNAseq_40	MIMAT0008446	Drosophila ananassae	miR-276b	dan-miR-276b	22	95.45	0.0001	36.2
RNAseq_40	MIMAT0001240	Drosophila pseudoobscura	miR-276b	dps-miR-276b	22	95.45	0.0001	36.2
RNAseq_40	MIMAT0000354	Drosophila melanogaster	miR-276b-3p	dme-miR-276b-3p	22	95.45	0.0001	36.2
RNAseq_40	MIMAT0023035	Tetranychus urticae	miR-276-3p	tur-miR-276-3p	21	95.24	0.0006	34.2
RNAseq_40	MIMAT0018919	Ixodes scapularis	miR-276	isc-miR-276	21	95.24	0.0006	34.2
RNAseq_67	MIMAT0031602	Branchiostoma belcheri	miR-184-3p	bbe-miR-184-3p	21	100	2e-06	42.1
RNAseq_67	MIMAT0029441	Ictalurus punctatus	miR-184	ipu-miR-184	21	100	2e-06	42.1
RNAseq_67	MIMAT0026244	Cyprinus carpio	miR-184	ccr-miR-184	21	100	2e-06	42.1
RNAseq_67	MIMAT0024943	Heliconius melpomene	miR-184	hme-miR-184	21	100	2e-06	42.1
RNAseq_67	MIMAT0024477	Manduca sexta	miR-184	mse-miR-184	21	100	2e-06	42.1
RNAseq_67	MIMAT0023073	Tetranychus urticae	miR-184-3p	tur-miR-184-3p	21	100	2e-06	42.1
RNAseq_67	MIMAT0018425	Nasonia longicornis	miR-184	nlo-miR-184	21	100	2e-06	42.1
RNAseq_67	MIMAT0018398	Nasonia giraulti	miR-184	ngi-miR-184	21	100	2e-06	42.1
RNAseq_67	MIMAT0015671	Nasonia vitripennis	miR-184	nvi-miR-184	21	100	2e-06	42.1
RNAseq_67	MIMAT0014424	Culex quinquefasciatus	miR-184	cqu-miR-184	21	100	2e-06	42.1
RNAseq_67	MIMAT0014207	Aedes aegypti	miR-184	aae-miR-184	21	100	2e-06	42.1
RNAseq_67	MIMAT0014132	Acyrthosiphon pisum	miR-184a	api-miR-184a	21	100	2e-06	42.1
RNAseq_67	MIMAT0012689	Ixodes scapularis	miR-184	isc-miR-184	21	100	2e-06	42.1
RNAseq_67	MIMAT0009671	Strongylocentrotus purpuratus	miR-184	spu-miR-184	21	100	2e-06	42.1
RNAseq_67	MIMAT0009633	Saccoglossus kowalevskii	miR-184-3p	sko-miR-184-3p	21	100	2e-06	42.1
RNAseq_67	MIMAT0009585	Lottia gigantea	miR-184	lgi-miR-184	21	100	2e-06	42.1
RNAseq_67	MIMAT0009530	Capitella teleta	miR-184a	cte-miR-184a	21	100	2e-06	42.1
RNAseq_67	MIMAT0009122	Drosophila yakuba	miR-184-3p	dya-miR-184-3p	21	100	2e-06	42.1
RNAseq_67	MIMAT0008989	Drosophila willistoni	miR-184-3p	dwi-miR-184-3p	21	100	2e-06	42.1
RNAseq_67	MIMAT0008949	Drosophila virilis	miR-184-3p	dvi-miR-184-3p	21	100	2e-06	42.1
RNAseq_67	MIMAT0008904	Drosophila simulans	miR-184-3p	dsi-miR-184-3p	21	100	2e-06	42.1
RNAseq_67	MIMAT0008822	Drosophila sechellia	miR-184-3p	dse-miR-184-3p	21	100	2e-06	42.1
RNAseq_67	MIMAT0008701	Drosophila persimilis	miR-184-3p	dpe-miR-184-3p	21	100	2e-06	42.1
RNAseq_67	MIMAT0008674	Drosophila mojavensis	miR-184-3p	dmo-miR-184-3p	21	100	2e-06	42.1
RNAseq_67	MIMAT0008567	Drosophila grimshawi	miR-184-3p	dgr-miR-184-3p	21	100	2e-06	42.1
RNAseq_67	MIMAT0008512	Drosophila erecta	miR-184-3p	der-miR-184-3p	21	100	2e-06	42.1
RNAseq_67	MIMAT0008436	Drosophila ananassae	miR-184-3p	dan-miR-184-3p	21	100	2e-06	42.1
RNAseq_67	MIMAT0008374	Tribolium castaneum	miR-184-3p	tca-miR-184-3p	21	100	2e-06	42.1
RNAseq_67	MIMAT0007902	Bombyx mori	miR-184-3p	bmo-miR-184-3p	21	100	2e-06	42.1
RNAseq_67	MIMAT0006108	Ciona intestinalis	miR-184	cin-miR-184	21	100	2e-06	42.1
RNAseq_67	MIMAT0001853	Danio rerio	miR-184	dre-miR-184	21	100	2e-06	42.1
RNAseq_67	MIMAT0001476	Apis mellifera	miR-184	ame-miR-184	21	100	2e-06	42.1
RNAseq_67	MIMAT0001232	Drosophila pseudoobscura	miR-184	dps-miR-184	21	100	2e-06	42.1
RNAseq_67	MIMAT0000331	Drosophila melanogaster	miR-184-3p	dme-miR-184-3p	21	100	2e-06	42.1
RNAseq_67	MIMAT0023809	Cricetulus griseus	miR-184	cgr-miR-184	20	100	9e-06	40.1
RNAseq_67	MIMAT0022536	Oryzias latipes	miR-184-3p	ola-miR-184-3p	20	100	9e-06	40.1
RNAseq_67	MIMAT0021814	Anolis carolinensis	miR-184-3p	aca-miR-184-3p	20	100	9e-06	40.1
RNAseq_67	MIMAT0014561	Taeniopygia guttata	miR-184	tgu-miR-184	20	100	9e-06	40.1
RNAseq_67	MIMAT0012894	Equus caballus	miR-184	eca-miR-184	20	100	9e-06	40.1
RNAseq_67	MIMAT0009842	Canis familiaris	miR-184	cfa-miR-184	20	100	9e-06	40.1
RNAseq_67	MIMAT0009488	Branchiostoma floridae	miR-184-3p	bfl-miR-184-3p	20	100	9e-06	40.1
RNAseq_67	MIMAT0009246	Bos taurus	miR-184	bta-miR-184	20	100	9e-06	40.1
RNAseq_67	MIMAT0006218	Macaca mulatta	miR-184	mml-miR-184	20	100	9e-06	40.1
RNAseq_67	MIMAT0004119	Monodelphis domestica	miR-184-3p	mdo-miR-184-3p	20	100	9e-06	40.1
RNAseq_67	MIMAT0002927	Tetraodon nigroviridis	miR-184	tni-miR-184	20	100	9e-06	40.1
RNAseq_67	MIMAT0002926	Fugu rubripes	miR-184	fru-miR-184	20	100	9e-06	40.1
RNAseq_67	MIMAT0002303	Macaca nemestrina	miR-184	mne-miR-184	20	100	9e-06	40.1
RNAseq_67	MIMAT0002302	Pongo pygmaeus	miR-184	ppy-miR-184	20	100	9e-06	40.1
RNAseq_67	MIMAT0002301	Pan troglodytes	miR-184	ptr-miR-184	20	100	9e-06	40.1
RNAseq_67	MIMAT0002127	Sus scrofa	miR-184	ssc-miR-184	20	100	9e-06	40.1
RNAseq_67	MIMAT0001504	Anopheles gambiae	miR-184	aga-miR-184	20	100	9e-06	40.1
RNAseq_67	MIMAT0001158	Gallus gallus	miR-184-3p	gga-miR-184-3p	20	100	9e-06	40.1
RNAseq_67	MIMAT0000861	Rattus norvegicus	miR-184	rno-miR-184	20	100	9e-06	40.1
RNAseq_67	MIMAT0000454	Homo sapiens	miR-184	hsa-miR-184	20	100	9e-06	40.1
RNAseq_67	MIMAT0000213	Mus musculus	miR-184-3p	mmu-miR-184-3p	20	100	9e-06	40.1
RNAseq_82	MIMAT0031726	Branchiostoma belcheri	miR-9-5p	bbe-miR-9-5p	22	100	6e-07	44.1
RNAseq_82	MIMAT0029528	Ictalurus punctatus	miR-9	ipu-miR-9	22	100	6e-07	44.1
RNAseq_82	MIMAT0025420	Paralichthys olivaceus	miR-9b-5p	pol-miR-9b-5p	22	100	6e-07	44.1
RNAseq_82	MIMAT0023348	Haemonchus contortus	miR-9	hco-miR-9	22	100	6e-07	44.1
RNAseq_82	MIMAT0022636	Oryzias latipes	miR-9a-5p	ola-miR-9a-5p	22	100	6e-07	44.1
RNAseq_82	MIMAT0022546	Oryzias latipes	miR-9b-5p	ola-miR-9b-5p	22	100	6e-07	44.1
RNAseq_82	MIMAT0021431	Ascaris suum	miR-9-5p	asu-miR-9-5p	22	100	6e-07	44.1
RNAseq_82	MIMAT0018442	Nasonia longicornis	miR-9a	nlo-miR-9a	22	100	6e-07	44.1
RNAseq_82	MIMAT0018405	Nasonia giraulti	miR-9a	ngi-miR-9a	22	100	6e-07	44.1
RNAseq_82	MIMAT0015729	Pongo pygmaeus	miR-9	ppy-miR-9	22	100	6e-07	44.1
RNAseq_82	MIMAT0015697	Nasonia vitripennis	miR-9a	nvi-miR-9a	22	100	6e-07	44.1
RNAseq_82	MIMAT0014748	Acyrthosiphon pisum	miR-9a	api-miR-9a	22	100	6e-07	44.1
RNAseq_82	MIMAT0014502	Taeniopygia guttata	miR-9-5p	tgu-miR-9-5p	22	100	6e-07	44.1
RNAseq_82	MIMAT0014323	Aedes aegypti	miR-9a	aae-miR-9a	22	100	6e-07	44.1
RNAseq_82	MIMAT0014100	Brugia malayi	miR-9-5p	bma-miR-9-5p	22	100	6e-07	44.1
RNAseq_82	MIMAT0012967	Equus caballus	miR-9a	eca-miR-9a	22	100	6e-07	44.1
RNAseq_82	MIMAT0012671	Daphnia pulex	miR-9-5p	dpu-miR-9-5p	22	100	6e-07	44.1
RNAseq_82	MIMAT0010146	Locusta migratoria	miR-9a-5p	lmi-miR-9a-5p	22	100	6e-07	44.1
RNAseq_82	MIMAT0009562	Lottia gigantea	miR-9	lgi-miR-9	22	100	6e-07	44.1
RNAseq_82	MIMAT0009508	Capitella teleta	miR-9-5p	cte-miR-9-5p	22	100	6e-07	44.1
RNAseq_82	MIMAT0009070	Drosophila yakuba	miR-9a	dya-miR-9a	22	100	6e-07	44.1
RNAseq_82	MIMAT0009034	Drosophila willistoni	miR-9a	dwi-miR-9a	22	100	6e-07	44.1
RNAseq_82	MIMAT0008929	Drosophila virilis	miR-9a	dvi-miR-9a	22	100	6e-07	44.1
RNAseq_82	MIMAT0008843	Drosophila simulans	miR-9a	dsi-miR-9a	22	100	6e-07	44.1
RNAseq_82	MIMAT0008800	Drosophila sechellia	miR-9a	dse-miR-9a	22	100	6e-07	44.1
RNAseq_82	MIMAT0008717	Drosophila persimilis	miR-9a	dpe-miR-9a	22	100	6e-07	44.1
RNAseq_82	MIMAT0008670	Drosophila mojavensis	miR-9a	dmo-miR-9a	22	100	6e-07	44.1
RNAseq_82	MIMAT0008589	Drosophila grimshawi	miR-9a	dgr-miR-9a	22	100	6e-07	44.1
RNAseq_82	MIMAT0008505	Drosophila erecta	miR-9a	der-miR-9a	22	100	6e-07	44.1
RNAseq_82	MIMAT0008458	Drosophila ananassae	miR-9a	dan-miR-9a	22	100	6e-07	44.1
RNAseq_82	MIMAT0006674	Canis familiaris	miR-9	cfa-miR-9	22	100	6e-07	44.1
RNAseq_82	MIMAT0006160	Macaca mulatta	miR-9-5p	mml-miR-9-5p	22	100	6e-07	44.1
RNAseq_82	MIMAT0004087	Monodelphis domestica	miR-9a-5p	mdo-miR-9a-5p	22	100	6e-07	44.1
RNAseq_82	MIMAT0004194	Bombyx mori	miR-9a-5p	bmo-miR-9a-5p	22	100	6e-07	44.1
RNAseq_82	MIMAT0003553	Xenopus tropicalis	miR-9a-5p	xtr-miR-9a-5p	22	100	6e-07	44.1
RNAseq_82	MIMAT0002911	Tetraodon nigroviridis	miR-9	tni-miR-9	22	100	6e-07	44.1
RNAseq_82	MIMAT0002910	Fugu rubripes	miR-9	fru-miR-9	22	100	6e-07	44.1
RNAseq_82	MIMAT0002279	Ateles geoffroyi	miR-9	age-miR-9	22	100	6e-07	44.1
RNAseq_82	MIMAT0002278	Macaca nemestrina	miR-9	mne-miR-9	22	100	6e-07	44.1
RNAseq_82	MIMAT0002277	Lagothrix lagotricha	miR-9	lla-miR-9	22	100	6e-07	44.1
RNAseq_82	MIMAT0002276	Gorilla gorilla	miR-9	ggo-miR-9	22	100	6e-07	44.1
RNAseq_82	MIMAT0002275	Pan troglodytes	miR-9	ptr-miR-9	22	100	6e-07	44.1
RNAseq_82	MIMAT0002169	Sus scrofa	miR-9-2	ssc-miR-9-2	22	100	6e-07	44.1
RNAseq_82	MIMAT0002168	Sus scrofa	miR-9-1	ssc-miR-9-1	22	100	6e-07	44.1
RNAseq_82	MIMAT0001769	Danio rerio	miR-9-5p	dre-miR-9-5p	22	100	6e-07	44.1
RNAseq_82	MIMAT0001526	Anopheles gambiae	miR-9a	aga-miR-9a	22	100	6e-07	44.1
RNAseq_82	MIMAT0001491	Apis mellifera	miR-9a	ame-miR-9a	22	100	6e-07	44.1
RNAseq_82	MIMAT0001211	Drosophila pseudoobscura	miR-9a	dps-miR-9a	22	100	6e-07	44.1
RNAseq_82	MIMAT0001195	Gallus gallus	miR-9-5p	gga-miR-9-5p	22	100	6e-07	44.1
RNAseq_82	MIMAT0000781	Rattus norvegicus	miR-9a-5p	rno-miR-9a-5p	22	100	6e-07	44.1
RNAseq_82	MIMAT0000441	Homo sapiens	miR-9-5p	hsa-miR-9-5p	22	100	6e-07	44.1
RNAseq_82	MIMAT0000142	Mus musculus	miR-9-5p	mmu-miR-9-5p	22	100	6e-07	44.1
RNAseq_82	MIMAT0000114	Drosophila melanogaster	miR-9a-5p	dme-miR-9a-5p	22	100	6e-07	44.1
RNAseq_82	MIMAT0026321	Cyprinus carpio	miR-9-3p	ccr-miR-9-3p	21	100	2e-06	42.1
RNAseq_82	MIMAT0025358	Sus scrofa	miR-9	ssc-miR-9	21	100	2e-06	42.1
RNAseq_82	MIMAT0024008	Cricetulus griseus	miR-9	cgr-miR-9	21	100	2e-06	42.1
RNAseq_82	MIMAT0019373	Petromyzon marinus	miR-9a-5p	pma-miR-9a-5p	21	100	2e-06	42.1
RNAseq_82	MIMAT0011737	Pristionchus pacificus	miR-9	ppc-miR-9	21	100	2e-06	42.1
RNAseq_82	MIMAT0009465	Branchiostoma floridae	miR-9-5p	bfl-miR-9-5p	21	100	2e-06	42.1
RNAseq_82	MIMAT0009653	Strongylocentrotus purpuratus	miR-9-5p	spu-miR-9-5p	21	100	2e-06	42.1
RNAseq_82	MIMAT0009389	Bos taurus	miR-9-5p	bta-miR-9-5p	21	100	2e-06	42.1
RNAseq_82	MIMAT0006792	Ornithorhynchus anatinus	miR-9-5p	oan-miR-9-5p	21	100	2e-06	42.1
RNAseq_82	MIMAT0003649	Xenopus tropicalis	miR-9-5p	xtr-miR-9-5p	21	100	2e-06	42.1
RNAseq_82	MIMAT0022783	Sarcophilus harrisii	miR-9	sha-miR-9	20	100	9e-06	40.1
RNAseq_82	MIMAT0010090	Tribolium castaneum	miR-9a-5p	tca-miR-9a-5p	20	100	9e-06	40.1
RNAseq_82	MIMAT0009610	Saccoglossus kowalevskii	miR-9	sko-miR-9	20	100	9e-06	40.1
RNAseq_82	MIMAT0011248	Schmidtea mediterranea	miR-9a-5p	sme-miR-9a-5p	22	95.45	0.0001	36.2
RNAseq_82	MIMAT0003555	Xenopus tropicalis	miR-9b-5p	xtr-miR-9b-5p	22	95.45	0.0001	36.2
RNAseq_82	MIMAT0025002	Heliconius melpomene	miR-9b	hme-miR-9b	21	95.24	0.0006	34.2
RNAseq_82	MIMAT0021472	Ascaris suum	miR-79-5p	asu-miR-79-5p	21	95.24	0.0006	34.2
RNAseq_141	MIMAT0014720	Acyrthosiphon pisum	miR-263b	api-miR-263b	23	100	2e-07	46.1
RNAseq_141	MIMAT0012650	Daphnia pulex	miR-263b	dpu-miR-263b	21	100	2e-06	42.1
RNAseq_141	MIMAT0023108	Tetranychus urticae	miR-263b-5p	tur-miR-263b-5p	20	100	9e-06	40.1
RNAseq_141	MIMAT0018419	Nasonia longicornis	miR-263b	nlo-miR-263b	20	100	9e-06	40.1
RNAseq_141	MIMAT0018395	Nasonia giraulti	miR-263b	ngi-miR-263b	20	100	9e-06	40.1
RNAseq_141	MIMAT0015703	Nasonia vitripennis	miR-263b	nvi-miR-263b	20	100	9e-06	40.1
RNAseq_141	MIMAT0010116	Apis mellifera	miR-263b	ame-miR-263b	20	100	9e-06	40.1
RNAseq_141	MIMAT0008378	Tribolium castaneum	miR-263b-5p	tca-miR-263b-5p	20	100	9e-06	40.1
RNAseq_141	MIMAT0024950	Heliconius melpomene	miR-263b	hme-miR-263b	22	95.45	0.0001	36.2
RNAseq_141	MIMAT0024484	Manduca sexta	miR-263b	mse-miR-263b	22	95.45	0.0001	36.2
RNAseq_141	MIMAT0014309	Aedes aegypti	miR-263b-5p	aae-miR-263b-5p	22	95.45	0.0001	36.2
RNAseq_153	MIMAT0024464	Manduca sexta	miR-317	mse-miR-317	22	100	6e-07	44.1
RNAseq_153	MIMAT0023061	Tetranychus urticae	miR-317-3p	tur-miR-317-3p	22	100	6e-07	44.1
RNAseq_153	MIMAT0018408	Nasonia giraulti	miR-317	ngi-miR-317	22	100	6e-07	44.1
RNAseq_153	MIMAT0015684	Nasonia vitripennis	miR-317	nvi-miR-317	22	100	6e-07	44.1
RNAseq_153	MIMAT0012661	Daphnia pulex	miR-317	dpu-miR-317	22	100	6e-07	44.1
RNAseq_153	MIMAT0008390	Tribolium castaneum	miR-317-3p	tca-miR-317-3p	22	100	6e-07	44.1
RNAseq_153	MIMAT0001488	Apis mellifera	miR-317	ame-miR-317	22	100	6e-07	44.1
RNAseq_153	MIMAT0009542	Capitella teleta	miR-317	cte-miR-317	21	100	2e-06	42.1
RNAseq_153	MIMAT0014732	Acyrthosiphon pisum	miR-317	api-miR-317	20	100	9e-06	40.1
RNAseq_153	MIMAT0014385	Culex quinquefasciatus	miR-317-3p	cqu-miR-317-3p	20	100	9e-06	40.1
RNAseq_153	MIMAT0014224	Aedes aegypti	miR-317	aae-miR-317	20	100	9e-06	40.1
RNAseq_153	MIMAT0009597	Lottia gigantea	miR-317	lgi-miR-317	20	100	9e-06	40.1
RNAseq_153	MIMAT0001522	Anopheles gambiae	miR-317	aga-miR-317	22	95.45	0.0001	36.2
RNAseq_201	MIMAT0012653	Daphnia pulex	miR-278	dpu-miR-278	21	100	2e-06	42.1
RNAseq_221	MIMAT0031570	Branchiostoma belcheri	miR-100-5p	bbe-miR-100-5p	21	100	2e-06	42.1
RNAseq_221	MIMAT0030454	Panagrellus redivivus	miR-100-5p	prd-miR-100-5p	21	100	2e-06	42.1
RNAseq_221	MIMAT0029385	Ictalurus punctatus	miR-100	ipu-miR-100	21	100	2e-06	42.1
RNAseq_221	MIMAT0024438	Manduca sexta	miR-100	mse-miR-100	21	100	2e-06	42.1
RNAseq_221	MIMAT0021709	Anolis carolinensis	miR-100	aca-miR-100	21	100	2e-06	42.1
RNAseq_221	MIMAT0021487	Ascaris suum	miR-100a-5p	asu-miR-100a-5p	21	100	2e-06	42.1
RNAseq_221	MIMAT0019437	Petromyzon marinus	miR-100a-5p	pma-miR-100a-5p	21	100	2e-06	42.1
RNAseq_221	MIMAT0015677	Nasonia vitripennis	miR-100	nvi-miR-100	21	100	2e-06	42.1
RNAseq_221	MIMAT0014687	Acyrthosiphon pisum	miR-100	api-miR-100	21	100	2e-06	42.1
RNAseq_221	MIMAT0014387	Culex quinquefasciatus	miR-100-5p	cqu-miR-100-5p	21	100	2e-06	42.1
RNAseq_221	MIMAT0014291	Aedes aegypti	miR-100	aae-miR-100	21	100	2e-06	42.1
RNAseq_221	MIMAT0014113	Brugia malayi	miR-100b	bma-miR-100b	21	100	2e-06	42.1
RNAseq_221	MIMAT0013911	Sus scrofa	miR-100	ssc-miR-100	21	100	2e-06	42.1
RNAseq_221	MIMAT0012980	Equus caballus	miR-100	eca-miR-100	21	100	2e-06	42.1
RNAseq_221	MIMAT0013596	Bombyx mori	miR-100	bmo-miR-100	21	100	2e-06	42.1
RNAseq_221	MIMAT0012683	Ixodes scapularis	miR-100	isc-miR-100	21	100	2e-06	42.1
RNAseq_221	MIMAT0012637	Daphnia pulex	miR-100	dpu-miR-100	21	100	2e-06	42.1
RNAseq_221	MIMAT0009623	Saccoglossus kowalevskii	miR-100	sko-miR-100	21	100	2e-06	42.1
RNAseq_221	MIMAT0009605	Nematostella vectensis	miR-100-5p	nve-miR-100-5p	21	100	2e-06	42.1
RNAseq_221	MIMAT0009577	Lottia gigantea	miR-100	lgi-miR-100	21	100	2e-06	42.1
RNAseq_221	MIMAT0009481	Branchiostoma floridae	miR-100-5p	bfl-miR-100-5p	21	100	2e-06	42.1
RNAseq_221	MIMAT0009215	Bos taurus	miR-100	bta-miR-100	21	100	2e-06	42.1
RNAseq_221	MIMAT0008369	Tribolium castaneum	miR-100-5p	tca-miR-100-5p	21	100	2e-06	42.1
RNAseq_221	MIMAT0007046	Ornithorhynchus anatinus	miR-100-5p	oan-miR-100-5p	21	100	2e-06	42.1
RNAseq_221	MIMAT0004420	Apis mellifera	miR-100	ame-miR-100	21	100	2e-06	42.1
RNAseq_221	MIMAT0003682	Xenopus tropicalis	miR-100	xtr-miR-100	21	100	2e-06	42.1
RNAseq_221	MIMAT0003064	Tetraodon nigroviridis	miR-100	tni-miR-100	21	100	2e-06	42.1
RNAseq_221	MIMAT0003063	Fugu rubripes	miR-100	fru-miR-100	21	100	2e-06	42.1
RNAseq_221	MIMAT0002424	Lagothrix lagotricha	miR-100	lla-miR-100	21	100	2e-06	42.1
RNAseq_221	MIMAT0002423	Saguinus labiatus	miR-100	sla-miR-100	21	100	2e-06	42.1
RNAseq_221	MIMAT0002422	Macaca mulatta	miR-100-5p	mml-miR-100-5p	21	100	2e-06	42.1
RNAseq_221	MIMAT0002421	Pan troglodytes	miR-100	ptr-miR-100	21	100	2e-06	42.1
RNAseq_221	MIMAT0002420	Pongo pygmaeus	miR-100	ppy-miR-100	21	100	2e-06	42.1
RNAseq_221	MIMAT0002419	Pan paniscus	miR-100	ppa-miR-100	21	100	2e-06	42.1
RNAseq_221	MIMAT0002418	Ateles geoffroyi	miR-100	age-miR-100	21	100	2e-06	42.1
RNAseq_221	MIMAT0002417	Gorilla gorilla	miR-100	ggo-miR-100	21	100	2e-06	42.1
RNAseq_221	MIMAT0001813	Danio rerio	miR-100	dre-miR-100	21	100	2e-06	42.1
RNAseq_221	MIMAT0001498	Anopheles gambiae	miR-100	aga-miR-100	21	100	2e-06	42.1
RNAseq_221	MIMAT0001178	Gallus gallus	miR-100-5p	gga-miR-100-5p	21	100	2e-06	42.1
RNAseq_221	MIMAT0000822	Rattus norvegicus	miR-100-5p	rno-miR-100-5p	21	100	2e-06	42.1
RNAseq_221	MIMAT0000655	Mus musculus	miR-100-5p	mmu-miR-100-5p	21	100	2e-06	42.1
RNAseq_221	MIMAT0000098	Homo sapiens	miR-100-5p	hsa-miR-100-5p	21	100	2e-06	42.1
RNAseq_221	MIMAT0026195	Cyprinus carpio	miR-100	ccr-miR-100	20	100	9e-06	40.1
RNAseq_221	MIMAT0023726	Cricetulus griseus	miR-100-5p	cgr-miR-100-5p	20	100	9e-06	40.1
RNAseq_221	MIMAT0022800	Sarcophilus harrisii	miR-100	sha-miR-100	20	100	9e-06	40.1
RNAseq_221	MIMAT0014511	Taeniopygia guttata	miR-100-5p	tgu-miR-100-5p	20	100	9e-06	40.1
RNAseq_221	MIMAT0004097	Monodelphis domestica	miR-100-5p	mdo-miR-100-5p	20	100	9e-06	40.1
RNAseq_221	MIMAT0029533	Ictalurus punctatus	miR-99b	ipu-miR-99b	22	95.45	0.0001	36.2
RNAseq_221	MIMAT0029532	Ictalurus punctatus	miR-99a	ipu-miR-99a	21	95.24	0.0006	34.2
RNAseq_221	MIMAT0021996	Anolis carolinensis	miR-99a-5p	aca-miR-99a-5p	21	95.24	0.0006	34.2
RNAseq_221	MIMAT0013896	Sus scrofa	miR-99a	ssc-miR-99a	21	95.24	0.0006	34.2
RNAseq_221	MIMAT0013184	Equus caballus	miR-99a	eca-miR-99a	21	95.24	0.0006	34.2
RNAseq_221	MIMAT0009059	Drosophila yakuba	miR-100	dya-miR-100	21	95.24	0.0006	34.2
RNAseq_221	MIMAT0009048	Drosophila willistoni	miR-100	dwi-miR-100	21	95.24	0.0006	34.2
RNAseq_221	MIMAT0008973	Drosophila virilis	miR-100	dvi-miR-100	21	95.24	0.0006	34.2
RNAseq_221	MIMAT0008872	Drosophila simulans	miR-100	dsi-miR-100	21	95.24	0.0006	34.2
RNAseq_221	MIMAT0008796	Drosophila sechellia	miR-100	dse-miR-100	21	95.24	0.0006	34.2
RNAseq_221	MIMAT0008637	Drosophila mojavensis	miR-100	dmo-miR-100	21	95.24	0.0006	34.2
RNAseq_221	MIMAT0008557	Drosophila grimshawi	miR-100	dgr-miR-100	21	95.24	0.0006	34.2
RNAseq_221	MIMAT0008488	Drosophila erecta	miR-100	der-miR-100	21	95.24	0.0006	34.2
RNAseq_221	MIMAT0008478	Drosophila ananassae	miR-100	dan-miR-100	21	95.24	0.0006	34.2
RNAseq_221	MIMAT0003582	Xenopus tropicalis	miR-99	xtr-miR-99	21	95.24	0.0006	34.2
RNAseq_221	MIMAT0002416	Pan paniscus	miR-99a	ppa-miR-99a	21	95.24	0.0006	34.2
RNAseq_221	MIMAT0002415	Macaca nemestrina	miR-99a	mne-miR-99a	21	95.24	0.0006	34.2
RNAseq_221	MIMAT0002414	Lagothrix lagotricha	miR-99a	lla-miR-99a	21	95.24	0.0006	34.2
RNAseq_221	MIMAT0002413	Pongo pygmaeus	miR-99a	ppy-miR-99a	21	95.24	0.0006	34.2
RNAseq_221	MIMAT0002412	Gorilla gorilla	miR-99a	ggo-miR-99a	21	95.24	0.0006	34.2
RNAseq_221	MIMAT0002411	Pan troglodytes	miR-99a	ptr-miR-99a	21	95.24	0.0006	34.2
RNAseq_221	MIMAT0002410	Macaca mulatta	miR-99a-5p	mml-miR-99a-5p	21	95.24	0.0006	34.2
RNAseq_221	MIMAT0001812	Danio rerio	miR-99	dre-miR-99	21	95.24	0.0006	34.2
RNAseq_221	MIMAT0001103	Gallus gallus	miR-99a-5p	gga-miR-99a-5p	21	95.24	0.0006	34.2
RNAseq_221	MIMAT0000820	Rattus norvegicus	miR-99a-5p	rno-miR-99a-5p	21	95.24	0.0006	34.2
RNAseq_221	MIMAT0000357	Drosophila melanogaster	miR-100-5p	dme-miR-100-5p	21	95.24	0.0006	34.2
RNAseq_221	MIMAT0000131	Mus musculus	miR-99a-5p	mmu-miR-99a-5p	21	95.24	0.0006	34.2
RNAseq_221	MIMAT0000097	Homo sapiens	miR-99a-5p	hsa-miR-99a-5p	21	95.24	0.0006	34.2
RNAseq_221	MIMAT0026327	Cyprinus carpio	miR-99	ccr-miR-99	20	95	0.002	32.2
RNAseq_221	MIMAT0024016	Cricetulus griseus	miR-99a-5p	cgr-miR-99a-5p	20	95	0.002	32.2
RNAseq_221	MIMAT0014524	Taeniopygia guttata	miR-99-5p	tgu-miR-99-5p	20	95	0.002	32.2
RNAseq_221	MIMAT0006668	Canis familiaris	miR-99a	cfa-miR-99a	20	95	0.002	32.2
RNAseq_221	MIMAT0007183	Ornithorhynchus anatinus	miR-99-5p	oan-miR-99-5p	20	95	0.002	32.2
RNAseq_221	MIMAT0003537	Bos taurus	miR-99a-5p	bta-miR-99a-5p	20	95	0.002	32.2
RNAseq_264	MIMAT0019366	Petromyzon marinus	miR-1b	pma-miR-1b	20	100	9e-06	40.1
RNAseq_264	MIMAT0013787	Bombyx mori	miR-1b-5p	bmo-miR-1b-5p	20	100	9e-06	40.1
RNAseq_283	MIMAT0021998	Anolis carolinensis	miR-99b-5p	aca-miR-99b-5p	20	100	9e-06	40.1
RNAseq_283	MIMAT0030064	Ovis aries	miR-99a	oar-miR-99a	20	95	0.002	32.2
RNAseq_283	MIMAT0019439	Petromyzon marinus	miR-100b	pma-miR-100b	20	95	0.002	32.2
RNAseq_283	MIMAT0021489	Ascaris suum	miR-100b-5p	asu-miR-100b-5p	22	90.91	0.035	28.2
RNAseq_377	MIMAT0024949	Heliconius melpomene	miR-263a	hme-miR-263a	22	100	6e-07	44.1
RNAseq_377	MIMAT0024468	Manduca sexta	miR-263a	mse-miR-263a	22	100	6e-07	44.1
RNAseq_377	MIMAT0014398	Culex quinquefasciatus	miR-263	cqu-miR-263	22	100	6e-07	44.1
RNAseq_377	MIMAT0014289	Aedes aegypti	miR-263a-5p	aae-miR-263a-5p	22	100	6e-07	44.1
RNAseq_377	MIMAT0010093	Tribolium castaneum	miR-263a-5p	tca-miR-263a-5p	22	100	6e-07	44.1
RNAseq_377	MIMAT0000319	Drosophila melanogaster	miR-263a-5p	dme-miR-263a-5p	22	100	6e-07	44.1
RNAseq_377	MIMAT0023112	Tetranychus urticae	miR-263a-5p	tur-miR-263a-5p	21	100	2e-06	42.1
RNAseq_377	MIMAT0012692	Ixodes scapularis	miR-263a	isc-miR-263a	21	100	2e-06	42.1
RNAseq_377	MIMAT0012649	Daphnia pulex	miR-263a	dpu-miR-263a	21	100	2e-06	42.1
RNAseq_377	MIMAT0009114	Drosophila yakuba	miR-263a	dya-miR-263a	21	100	2e-06	42.1
RNAseq_377	MIMAT0009039	Drosophila willistoni	miR-263a	dwi-miR-263a	21	100	2e-06	42.1
RNAseq_377	MIMAT0008919	Drosophila virilis	miR-263a	dvi-miR-263a	21	100	2e-06	42.1
RNAseq_377	MIMAT0008851	Drosophila simulans	miR-263a	dsi-miR-263a	21	100	2e-06	42.1
RNAseq_377	MIMAT0008768	Drosophila sechellia	miR-263a	dse-miR-263a	21	100	2e-06	42.1
RNAseq_377	MIMAT0008761	Drosophila persimilis	miR-263a	dpe-miR-263a	21	100	2e-06	42.1
RNAseq_377	MIMAT0008653	Drosophila mojavensis	miR-263a	dmo-miR-263a	21	100	2e-06	42.1
RNAseq_377	MIMAT0008621	Drosophila grimshawi	miR-263a	dgr-miR-263a	21	100	2e-06	42.1
RNAseq_377	MIMAT0008506	Drosophila erecta	miR-263a	der-miR-263a	21	100	2e-06	42.1
RNAseq_377	MIMAT0008443	Drosophila ananassae	miR-263a	dan-miR-263a	21	100	2e-06	42.1
RNAseq_377	MIMAT0004200	Bombyx mori	miR-263a-5p	bmo-miR-263a-5p	21	100	2e-06	42.1
RNAseq_377	MIMAT0001507	Anopheles gambiae	miR-263a	aga-miR-263a	21	100	2e-06	42.1
RNAseq_377	MIMAT0001479	Apis mellifera	miR-263a	ame-miR-263a	21	100	2e-06	42.1
RNAseq_377	MIMAT0001235	Drosophila pseudoobscura	miR-263a	dps-miR-263a	21	100	2e-06	42.1
RNAseq_377	MIMAT0014718	Acyrthosiphon pisum	miR-263a	api-miR-263a	22	95.45	0.0001	36.2
RNAseq_377	MIMAT0009584	Lottia gigantea	miR-183	lgi-miR-183	22	95.45	0.0001	36.2
RNAseq_391	MIMAT0031572	Branchiostoma belcheri	miR-10a-5p	bbe-miR-10a-5p	22	100	6e-07	44.1
RNAseq_391	MIMAT0029391	Ictalurus punctatus	miR-10a	ipu-miR-10a	22	100	6e-07	44.1
RNAseq_391	MIMAT0023735	Cricetulus griseus	miR-10a-5p	cgr-miR-10a-5p	22	100	6e-07	44.1
RNAseq_391	MIMAT0021717	Anolis carolinensis	miR-10a-5p	aca-miR-10a-5p	22	100	6e-07	44.1
RNAseq_391	MIMAT0013884	Sus scrofa	miR-10a-5p	ssc-miR-10a-5p	22	100	6e-07	44.1
RNAseq_391	MIMAT0013019	Equus caballus	miR-10a	eca-miR-10a	22	100	6e-07	44.1
RNAseq_391	MIMAT0012682	Ixodes scapularis	miR-10	isc-miR-10	22	100	6e-07	44.1
RNAseq_391	MIMAT0012636	Daphnia pulex	miR-10	dpu-miR-10	22	100	6e-07	44.1
RNAseq_391	MIMAT0010144	Locusta migratoria	miR-10-5p	lmi-miR-10-5p	22	100	6e-07	44.1
RNAseq_391	MIMAT0009611	Saccoglossus kowalevskii	miR-10	sko-miR-10	22	100	6e-07	44.1
RNAseq_391	MIMAT0009563	Lottia gigantea	miR-10	lgi-miR-10	22	100	6e-07	44.1
RNAseq_391	MIMAT0009466	Branchiostoma floridae	miR-10a-5p	bfl-miR-10a-5p	22	100	6e-07	44.1
RNAseq_391	MIMAT0008357	Tribolium castaneum	miR-10-5p	tca-miR-10-5p	22	100	6e-07	44.1
RNAseq_391	MIMAT0007944	Pan troglodytes	miR-10a	ptr-miR-10a	22	100	6e-07	44.1
RNAseq_391	MIMAT0006737	Canis familiaris	miR-10a	cfa-miR-10a	22	100	6e-07	44.1
RNAseq_391	MIMAT0006161	Macaca mulatta	miR-10a-5p	mml-miR-10a-5p	22	100	6e-07	44.1
RNAseq_391	MIMAT0007731	Gallus gallus	miR-10a-5p	gga-miR-10a-5p	22	100	6e-07	44.1
RNAseq_391	MIMAT0007122	Ornithorhynchus anatinus	miR-10a-5p	oan-miR-10a-5p	22	100	6e-07	44.1
RNAseq_391	MIMAT0004089	Monodelphis domestica	miR-10a-5p	mdo-miR-10a-5p	22	100	6e-07	44.1
RNAseq_391	MIMAT0003786	Bos taurus	miR-10a	bta-miR-10a	22	100	6e-07	44.1
RNAseq_391	MIMAT0003557	Xenopus tropicalis	miR-10a	xtr-miR-10a	22	100	6e-07	44.1
RNAseq_391	MIMAT0002490	Pan paniscus	miR-10a	ppa-miR-10a	22	100	6e-07	44.1
RNAseq_391	MIMAT0002489	Ateles geoffroyi	miR-10a	age-miR-10a	22	100	6e-07	44.1
RNAseq_391	MIMAT0002488	Saguinus labiatus	miR-10a	sla-miR-10a	22	100	6e-07	44.1
RNAseq_391	MIMAT0002487	Pongo pygmaeus	miR-10a	ppy-miR-10a	22	100	6e-07	44.1
RNAseq_391	MIMAT0002486	Gorilla gorilla	miR-10a	ggo-miR-10a	22	100	6e-07	44.1
RNAseq_391	MIMAT0001267	Danio rerio	miR-10a-5p	dre-miR-10a-5p	22	100	6e-07	44.1
RNAseq_391	MIMAT0000782	Rattus norvegicus	miR-10a-5p	rno-miR-10a-5p	22	100	6e-07	44.1
RNAseq_391	MIMAT0000648	Mus musculus	miR-10a-5p	mmu-miR-10a-5p	22	100	6e-07	44.1
RNAseq_391	MIMAT0000253	Homo sapiens	miR-10a-5p	hsa-miR-10a-5p	22	100	6e-07	44.1
RNAseq_391	MIMAT0030030	Ovis aries	miR-10a	oar-miR-10a	21	100	2e-06	42.1
RNAseq_391	MIMAT0024932	Heliconius melpomene	miR-10	hme-miR-10	21	100	2e-06	42.1
RNAseq_391	MIMAT0023026	Tetranychus urticae	miR-10-5p	tur-miR-10-5p	21	100	2e-06	42.1
RNAseq_391	MIMAT0018416	Nasonia longicornis	miR-10	nlo-miR-10	21	100	2e-06	42.1
RNAseq_391	MIMAT0015676	Nasonia vitripennis	miR-10	nvi-miR-10	21	100	2e-06	42.1
RNAseq_391	MIMAT0014404	Culex quinquefasciatus	miR-10-5p	cqu-miR-10-5p	21	100	2e-06	42.1
RNAseq_391	MIMAT0014277	Aedes aegypti	miR-10	aae-miR-10	21	100	2e-06	42.1
RNAseq_391	MIMAT0014128	Acyrthosiphon pisum	miR-10	api-miR-10	21	100	2e-06	42.1
RNAseq_391	MIMAT0009654	Strongylocentrotus purpuratus	miR-10	spu-miR-10	21	100	2e-06	42.1
RNAseq_391	MIMAT0009082	Drosophila yakuba	miR-10	dya-miR-10	21	100	2e-06	42.1
RNAseq_391	MIMAT0009033	Drosophila willistoni	miR-10	dwi-miR-10	21	100	2e-06	42.1
RNAseq_391	MIMAT0008960	Drosophila virilis	miR-10	dvi-miR-10	21	100	2e-06	42.1
RNAseq_391	MIMAT0008887	Drosophila simulans	miR-10	dsi-miR-10	21	100	2e-06	42.1
RNAseq_391	MIMAT0008784	Drosophila sechellia	miR-10	dse-miR-10	21	100	2e-06	42.1
RNAseq_391	MIMAT0008754	Drosophila persimilis	miR-10	dpe-miR-10	21	100	2e-06	42.1
RNAseq_391	MIMAT0008693	Drosophila mojavensis	miR-10	dmo-miR-10	21	100	2e-06	42.1
RNAseq_391	MIMAT0008601	Drosophila grimshawi	miR-10	dgr-miR-10	21	100	2e-06	42.1
RNAseq_391	MIMAT0008549	Drosophila erecta	miR-10	der-miR-10	21	100	2e-06	42.1
RNAseq_391	MIMAT0008476	Drosophila ananassae	miR-10	dan-miR-10	21	100	2e-06	42.1
RNAseq_391	MIMAT0004419	Apis mellifera	miR-10	ame-miR-10	21	100	2e-06	42.1
RNAseq_391	MIMAT0004195	Bombyx mori	miR-10-5p	bmo-miR-10-5p	21	100	2e-06	42.1
RNAseq_391	MIMAT0001497	Anopheles gambiae	miR-10	aga-miR-10	21	100	2e-06	42.1
RNAseq_391	MIMAT0001214	Drosophila pseudoobscura	miR-10	dps-miR-10	21	100	2e-06	42.1
RNAseq_391	MIMAT0000115	Drosophila melanogaster	miR-10-5p	dme-miR-10-5p	21	100	2e-06	42.1
RNAseq_391	MIMAT0029393	Ictalurus punctatus	miR-10c	ipu-miR-10c	22	95.45	0.0001	36.2
RNAseq_391	MIMAT0029392	Ictalurus punctatus	miR-10b	ipu-miR-10b	22	95.45	0.0001	36.2
RNAseq_391	MIMAT0026201	Cyprinus carpio	miR-10c	ccr-miR-10c	22	95.45	0.0001	36.2
RNAseq_391	MIMAT0026200	Cyprinus carpio	miR-10b	ccr-miR-10b	22	95.45	0.0001	36.2
RNAseq_391	MIMAT0023737	Cricetulus griseus	miR-10b-5p	cgr-miR-10b-5p	22	95.45	0.0001	36.2
RNAseq_391	MIMAT0022651	Oryzias latipes	miR-10b	ola-miR-10b	22	95.45	0.0001	36.2
RNAseq_391	MIMAT0021719	Anolis carolinensis	miR-10b-5p	aca-miR-10b-5p	22	95.45	0.0001	36.2
RNAseq_391	MIMAT0018618	Taeniopygia guttata	miR-10a-5p	tgu-miR-10a-5p	22	95.45	0.0001	36.2
RNAseq_391	MIMAT0015730	Pongo pygmaeus	miR-10b	ppy-miR-10b	22	95.45	0.0001	36.2
RNAseq_391	MIMAT0013885	Sus scrofa	miR-10b	ssc-miR-10b	22	95.45	0.0001	36.2
RNAseq_391	MIMAT0013090	Equus caballus	miR-10b	eca-miR-10b	22	95.45	0.0001	36.2
RNAseq_391	MIMAT0007945	Pan troglodytes	miR-10b	ptr-miR-10b	22	95.45	0.0001	36.2
RNAseq_391	MIMAT0006162	Macaca mulatta	miR-10b-5p	mml-miR-10b-5p	22	95.45	0.0001	36.2
RNAseq_391	MIMAT0007218	Ornithorhynchus anatinus	miR-10b-5p	oan-miR-10b-5p	22	95.45	0.0001	36.2
RNAseq_391	MIMAT0004090	Monodelphis domestica	miR-10b-5p	mdo-miR-10b-5p	22	95.45	0.0001	36.2
RNAseq_391	MIMAT0003839	Bos taurus	miR-10b	bta-miR-10b	22	95.45	0.0001	36.2
RNAseq_391	MIMAT0003558	Xenopus tropicalis	miR-10b	xtr-miR-10b	22	95.45	0.0001	36.2
RNAseq_391	MIMAT0003088	Tetraodon nigroviridis	miR-10c	tni-miR-10c	22	95.45	0.0001	36.2
RNAseq_391	MIMAT0003087	Fugu rubripes	miR-10c	fru-miR-10c	22	95.45	0.0001	36.2
RNAseq_391	MIMAT0002964	Tetraodon nigroviridis	miR-10b	tni-miR-10b	22	95.45	0.0001	36.2
RNAseq_391	MIMAT0002963	Fugu rubripes	miR-10b	fru-miR-10b	22	95.45	0.0001	36.2
RNAseq_391	MIMAT0002493	Pan paniscus	miR-10b	ppa-miR-10b	22	95.45	0.0001	36.2
RNAseq_391	MIMAT0002492	Macaca nemestrina	miR-10b	mne-miR-10b	22	95.45	0.0001	36.2
RNAseq_391	MIMAT0002491	Gorilla gorilla	miR-10b	ggo-miR-10b	22	95.45	0.0001	36.2
RNAseq_391	MIMAT0001770	Danio rerio	miR-10c	dre-miR-10c	22	95.45	0.0001	36.2
RNAseq_391	MIMAT0001268	Danio rerio	miR-10b	dre-miR-10b	22	95.45	0.0001	36.2
RNAseq_391	MIMAT0001148	Gallus gallus	miR-10b-5p	gga-miR-10b-5p	22	95.45	0.0001	36.2
RNAseq_391	MIMAT0000254	Homo sapiens	miR-10b-5p	hsa-miR-10b-5p	22	95.45	0.0001	36.2
RNAseq_391	MIMAT0000208	Mus musculus	miR-10b-5p	mmu-miR-10b-5p	22	95.45	0.0001	36.2
RNAseq_391	MIMAT0003973	Schmidtea mediterranea	miR-10b-5p	sme-miR-10b-5p	20	95	0.002	32.2
RNAseq_391	MIMAT0021721	Anolis carolinensis	miR-10c-5p	aca-miR-10c-5p	22	90.91	0.035	28.2
RNAseq_433	MIMAT0018432	Nasonia longicornis	miR-305	nlo-miR-305	23	100	2e-07	46.1
RNAseq_433	MIMAT0018403	Nasonia giraulti	miR-305	ngi-miR-305	23	100	2e-07	46.1
RNAseq_433	MIMAT0015686	Nasonia vitripennis	miR-305	nvi-miR-305	23	100	2e-07	46.1
RNAseq_433	MIMAT0014249	Aedes aegypti	miR-305-5p	aae-miR-305-5p	23	100	2e-07	46.1
RNAseq_433	MIMAT0009067	Drosophila yakuba	miR-305	dya-miR-305	23	100	2e-07	46.1
RNAseq_433	MIMAT0008997	Drosophila willistoni	miR-305	dwi-miR-305	23	100	2e-07	46.1
RNAseq_433	MIMAT0008940	Drosophila virilis	miR-305	dvi-miR-305	23	100	2e-07	46.1
RNAseq_433	MIMAT0008790	Drosophila sechellia	miR-305	dse-miR-305	23	100	2e-07	46.1
RNAseq_433	MIMAT0008755	Drosophila persimilis	miR-305	dpe-miR-305	23	100	2e-07	46.1
RNAseq_433	MIMAT0008646	Drosophila mojavensis	miR-305	dmo-miR-305	23	100	2e-07	46.1
RNAseq_433	MIMAT0008558	Drosophila grimshawi	miR-305	dgr-miR-305	23	100	2e-07	46.1
RNAseq_433	MIMAT0008527	Drosophila erecta	miR-305	der-miR-305	23	100	2e-07	46.1
RNAseq_433	MIMAT0008464	Drosophila ananassae	miR-305	dan-miR-305	23	100	2e-07	46.1
RNAseq_433	MIMAT0004207	Bombyx mori	miR-305-5p	bmo-miR-305-5p	23	100	2e-07	46.1
RNAseq_433	MIMAT0001518	Anopheles gambiae	miR-305	aga-miR-305	23	100	2e-07	46.1
RNAseq_433	MIMAT0001486	Apis mellifera	miR-305	ame-miR-305	23	100	2e-07	46.1
RNAseq_433	MIMAT0001255	Drosophila pseudoobscura	miR-305	dps-miR-305	23	100	2e-07	46.1
RNAseq_433	MIMAT0000391	Drosophila melanogaster	miR-305-5p	dme-miR-305-5p	23	100	2e-07	46.1
RNAseq_433	MIMAT0024974	Heliconius melpomene	miR-305	hme-miR-305	22	100	6e-07	44.1
RNAseq_433	MIMAT0023114	Tetranychus urticae	miR-305-5p	tur-miR-305-5p	22	100	6e-07	44.1
RNAseq_433	MIMAT0018920	Ixodes scapularis	miR-305	isc-miR-305	22	100	6e-07	44.1
RNAseq_433	MIMAT0014382	Culex quinquefasciatus	miR-305-5p	cqu-miR-305-5p	22	100	6e-07	44.1
RNAseq_433	MIMAT0008388	Tribolium castaneum	miR-305-5p	tca-miR-305-5p	21	100	2e-06	42.1
RNAseq_433	MIMAT0018924	Daphnia pulex	miR-305	dpu-miR-305	21	95.24	0.0006	34.2
RNAseq_471	MIMAT0024430	Manduca sexta	miR-275	mse-miR-275	23	100	2e-07	46.1
RNAseq_471	MIMAT0018429	Nasonia longicornis	miR-275	nlo-miR-275	23	100	2e-07	46.1
RNAseq_471	MIMAT0018386	Nasonia giraulti	miR-275	ngi-miR-275	23	100	2e-07	46.1
RNAseq_471	MIMAT0015685	Nasonia vitripennis	miR-275	nvi-miR-275	23	100	2e-07	46.1
RNAseq_471	MIMAT0012693	Ixodes scapularis	miR-275	isc-miR-275	23	100	2e-07	46.1
RNAseq_471	MIMAT0012651	Daphnia pulex	miR-275	dpu-miR-275	23	100	2e-07	46.1
RNAseq_471	MIMAT0009115	Drosophila yakuba	miR-275	dya-miR-275	23	100	2e-07	46.1
RNAseq_471	MIMAT0009045	Drosophila willistoni	miR-275	dwi-miR-275	23	100	2e-07	46.1
RNAseq_471	MIMAT0008970	Drosophila virilis	miR-275	dvi-miR-275	23	100	2e-07	46.1
RNAseq_471	MIMAT0008880	Drosophila simulans	miR-275	dsi-miR-275	23	100	2e-07	46.1
RNAseq_471	MIMAT0008820	Drosophila sechellia	miR-275	dse-miR-275	23	100	2e-07	46.1
RNAseq_471	MIMAT0008744	Drosophila persimilis	miR-275	dpe-miR-275	23	100	2e-07	46.1
RNAseq_471	MIMAT0008664	Drosophila mojavensis	miR-275	dmo-miR-275	23	100	2e-07	46.1
RNAseq_471	MIMAT0008625	Drosophila grimshawi	miR-275	dgr-miR-275	23	100	2e-07	46.1
RNAseq_471	MIMAT0008503	Drosophila erecta	miR-275	der-miR-275	23	100	2e-07	46.1
RNAseq_471	MIMAT0008451	Drosophila ananassae	miR-275	dan-miR-275	23	100	2e-07	46.1
RNAseq_471	MIMAT0008379	Tribolium castaneum	miR-275-3p	tca-miR-275-3p	23	100	2e-07	46.1
RNAseq_471	MIMAT0004424	Apis mellifera	miR-275	ame-miR-275	23	100	2e-07	46.1
RNAseq_471	MIMAT0004201	Bombyx mori	miR-275-3p	bmo-miR-275-3p	23	100	2e-07	46.1
RNAseq_471	MIMAT0001508	Anopheles gambiae	miR-275	aga-miR-275	23	100	2e-07	46.1
RNAseq_471	MIMAT0001238	Drosophila pseudoobscura	miR-275	dps-miR-275	23	100	2e-07	46.1
RNAseq_471	MIMAT0000333	Drosophila melanogaster	miR-275-3p	dme-miR-275-3p	23	100	2e-07	46.1
RNAseq_471	MIMAT0014721	Acyrthosiphon pisum	miR-275	api-miR-275	21	100	2e-06	42.1
RNAseq_471	MIMAT0014364	Culex quinquefasciatus	miR-275	cqu-miR-275	20	100	9e-06	40.1
RNAseq_471	MIMAT0014209	Aedes aegypti	miR-275-3p	aae-miR-275-3p	20	100	9e-06	40.1
RNAseq_791	MIMAT0031586	Branchiostoma belcheri	miR-133-5p	bbe-miR-133-5p	22	100	6e-07	44.1
RNAseq_791	MIMAT0029407	Ictalurus punctatus	miR-133a	ipu-miR-133a	22	100	6e-07	44.1
RNAseq_791	MIMAT0028281	Macaca mulatta	miR-133d-3p	mml-miR-133d-3p	22	100	6e-07	44.1
RNAseq_791	MIMAT0026215	Cyprinus carpio	miR-133a-3p	ccr-miR-133a-3p	22	100	6e-07	44.1
RNAseq_791	MIMAT0024938	Heliconius melpomene	miR-133	hme-miR-133	22	100	6e-07	44.1
RNAseq_791	MIMAT0024462	Manduca sexta	miR-133	mse-miR-133	22	100	6e-07	44.1
RNAseq_791	MIMAT0023081	Tetranychus urticae	miR-133-3p	tur-miR-133-3p	22	100	6e-07	44.1
RNAseq_791	MIMAT0018422	Nasonia longicornis	miR-133	nlo-miR-133	22	100	6e-07	44.1
RNAseq_791	MIMAT0018412	Nasonia giraulti	miR-133	ngi-miR-133	22	100	6e-07	44.1
RNAseq_791	MIMAT0015691	Nasonia vitripennis	miR-133	nvi-miR-133	22	100	6e-07	44.1
RNAseq_791	MIMAT0014972	Ovis aries	miR-133	oar-miR-133	22	100	6e-07	44.1
RNAseq_791	MIMAT0014437	Culex quinquefasciatus	miR-133	cqu-miR-133	22	100	6e-07	44.1
RNAseq_791	MIMAT0014275	Aedes aegypti	miR-133	aae-miR-133	22	100	6e-07	44.1
RNAseq_791	MIMAT0012686	Ixodes scapularis	miR-133	isc-miR-133	22	100	6e-07	44.1
RNAseq_791	MIMAT0012640	Daphnia pulex	miR-133	dpu-miR-133	22	100	6e-07	44.1
RNAseq_791	MIMAT0009834	Canis familiaris	miR-133a	cfa-miR-133a	22	100	6e-07	44.1
RNAseq_791	MIMAT0009627	Saccoglossus kowalevskii	miR-133	sko-miR-133	22	100	6e-07	44.1
RNAseq_791	MIMAT0009580	Lottia gigantea	miR-133-3p	lgi-miR-133-3p	22	100	6e-07	44.1
RNAseq_791	MIMAT0009526	Capitella teleta	miR-133	cte-miR-133	22	100	6e-07	44.1
RNAseq_791	MIMAT0009484	Branchiostoma floridae	miR-133	bfl-miR-133	22	100	6e-07	44.1
RNAseq_791	MIMAT0009072	Drosophila yakuba	miR-133	dya-miR-133	22	100	6e-07	44.1
RNAseq_791	MIMAT0009051	Drosophila willistoni	miR-133	dwi-miR-133	22	100	6e-07	44.1
RNAseq_791	MIMAT0008936	Drosophila virilis	miR-133	dvi-miR-133	22	100	6e-07	44.1
RNAseq_791	MIMAT0008900	Drosophila simulans	miR-133	dsi-miR-133	22	100	6e-07	44.1
RNAseq_791	MIMAT0008834	Drosophila sechellia	miR-133	dse-miR-133	22	100	6e-07	44.1
RNAseq_791	MIMAT0008712	Drosophila persimilis	miR-133	dpe-miR-133	22	100	6e-07	44.1
RNAseq_791	MIMAT0008678	Drosophila mojavensis	miR-133	dmo-miR-133	22	100	6e-07	44.1
RNAseq_791	MIMAT0008620	Drosophila grimshawi	miR-133	dgr-miR-133	22	100	6e-07	44.1
RNAseq_791	MIMAT0008490	Drosophila erecta	miR-133	der-miR-133	22	100	6e-07	44.1
RNAseq_791	MIMAT0008468	Drosophila ananassae	miR-133	dan-miR-133	22	100	6e-07	44.1
RNAseq_791	MIMAT0008372	Tribolium castaneum	miR-133-3p	tca-miR-133-3p	22	100	6e-07	44.1
RNAseq_791	MIMAT0007901	Bombyx mori	miR-133	bmo-miR-133	22	100	6e-07	44.1
RNAseq_791	MIMAT0006865	Ornithorhynchus anatinus	miR-133a-3p	oan-miR-133a-3p	22	100	6e-07	44.1
RNAseq_791	MIMAT0004107	Monodelphis domestica	miR-133a-3p	mdo-miR-133a-3p	22	100	6e-07	44.1
RNAseq_791	MIMAT0003708	Xenopus tropicalis	miR-133a	xtr-miR-133a	22	100	6e-07	44.1
RNAseq_791	MIMAT0002247	Macaca nemestrina	miR-133a	mne-miR-133a	22	100	6e-07	44.1
RNAseq_791	MIMAT0002246	Lagothrix lagotricha	miR-133a	lla-miR-133a	22	100	6e-07	44.1
RNAseq_791	MIMAT0002245	Saguinus labiatus	miR-133a	sla-miR-133a	22	100	6e-07	44.1
RNAseq_791	MIMAT0002241	Pan paniscus	miR-133a	ppa-miR-133a	22	100	6e-07	44.1
RNAseq_791	MIMAT0002240	Ateles geoffroyi	miR-133a	age-miR-133a	22	100	6e-07	44.1
RNAseq_791	MIMAT0002239	Gorilla gorilla	miR-133a	ggo-miR-133a	22	100	6e-07	44.1
RNAseq_791	MIMAT0001501	Anopheles gambiae	miR-133	aga-miR-133	22	100	6e-07	44.1
RNAseq_791	MIMAT0001475	Apis mellifera	miR-133	ame-miR-133	22	100	6e-07	44.1
RNAseq_791	MIMAT0001350	Xenopus laevis	miR-133a	xla-miR-133a	22	100	6e-07	44.1
RNAseq_791	MIMAT0001231	Drosophila pseudoobscura	miR-133	dps-miR-133	22	100	6e-07	44.1
RNAseq_791	MIMAT0001126	Gallus gallus	miR-133a-3p	gga-miR-133a-3p	22	100	6e-07	44.1
RNAseq_791	MIMAT0000340	Drosophila melanogaster	miR-133-3p	dme-miR-133-3p	22	100	6e-07	44.1
RNAseq_791	MIMAT0021749	Anolis carolinensis	miR-133a	aca-miR-133a	21	100	2e-06	42.1
RNAseq_791	MIMAT0017872	Rattus norvegicus	miR-133c	rno-miR-133c	21	100	2e-06	42.1
RNAseq_791	MIMAT0016973	Pongo pygmaeus	miR-133c	ppy-miR-133c	21	100	2e-06	42.1
RNAseq_791	MIMAT0012997	Equus caballus	miR-133a	eca-miR-133a	21	100	2e-06	42.1
RNAseq_791	MIMAT0010186	Sus scrofa	miR-133a-3p	ssc-miR-133a-3p	21	100	2e-06	42.1
RNAseq_791	MIMAT0009833	Canis familiaris	miR-133c	cfa-miR-133c	21	100	2e-06	42.1
RNAseq_791	MIMAT0009225	Bos taurus	miR-133a	bta-miR-133a	21	100	2e-06	42.1
RNAseq_791	MIMAT0006777	Macaca mulatta	miR-133c-3p	mml-miR-133c-3p	21	100	2e-06	42.1
RNAseq_791	MIMAT0006102	Ciona intestinalis	miR-133-3p	cin-miR-133-3p	21	100	2e-06	42.1
RNAseq_791	MIMAT0003595	Xenopus tropicalis	miR-133c	xtr-miR-133c	21	100	2e-06	42.1
RNAseq_791	MIMAT0003058	Tetraodon nigroviridis	miR-133	tni-miR-133	21	100	2e-06	42.1
RNAseq_791	MIMAT0003057	Fugu rubripes	miR-133	fru-miR-133	21	100	2e-06	42.1
RNAseq_791	MIMAT0002243	Pan troglodytes	miR-133a	ptr-miR-133a	21	100	2e-06	42.1
RNAseq_791	MIMAT0001830	Danio rerio	miR-133a-3p	dre-miR-133a-3p	21	100	2e-06	42.1
RNAseq_791	MIMAT0001176	Gallus gallus	miR-133c-3p	gga-miR-133c-3p	21	100	2e-06	42.1
RNAseq_791	MIMAT0000839	Rattus norvegicus	miR-133a-3p	rno-miR-133a-3p	21	100	2e-06	42.1
RNAseq_791	MIMAT0000427	Homo sapiens	miR-133a-3p	hsa-miR-133a-3p	21	100	2e-06	42.1
RNAseq_791	MIMAT0000145	Mus musculus	miR-133a-3p	mmu-miR-133a-3p	21	100	2e-06	42.1
RNAseq_791	MIMAT0029408	Ictalurus punctatus	miR-133b	ipu-miR-133b	20	100	9e-06	40.1
RNAseq_791	MIMAT0025433	Paralichthys olivaceus	miR-133-3p	pol-miR-133-3p	20	100	9e-06	40.1
RNAseq_791	MIMAT0021498	Ascaris suum	miR-133-3p	asu-miR-133-3p	20	100	9e-06	40.1
RNAseq_791	MIMAT0019462	Petromyzon marinus	miR-133b-3p	pma-miR-133b-3p	20	100	9e-06	40.1
RNAseq_791	MIMAT0019460	Petromyzon marinus	miR-133a	pma-miR-133a	20	100	9e-06	40.1
RNAseq_791	MIMAT0015756	Pongo pygmaeus	miR-133b	ppy-miR-133b	20	100	9e-06	40.1
RNAseq_791	MIMAT0014571	Taeniopygia guttata	miR-133-3p	tgu-miR-133-3p	20	100	9e-06	40.1
RNAseq_791	MIMAT0014117	Brugia malayi	miR-133	bma-miR-133	20	100	9e-06	40.1
RNAseq_791	MIMAT0013869	Sus scrofa	miR-133b	ssc-miR-133b	20	100	9e-06	40.1
RNAseq_791	MIMAT0013097	Equus caballus	miR-133b	eca-miR-133b	20	100	9e-06	40.1
RNAseq_791	MIMAT0009835	Canis familiaris	miR-133b	cfa-miR-133b	20	100	9e-06	40.1
RNAseq_791	MIMAT0009226	Bos taurus	miR-133b	bta-miR-133b	20	100	9e-06	40.1
RNAseq_791	MIMAT0008030	Pan troglodytes	miR-133b	ptr-miR-133b	20	100	9e-06	40.1
RNAseq_791	MIMAT0011137	Xenopus laevis	miR-133b	xla-miR-133b	20	100	9e-06	40.1
RNAseq_791	MIMAT0006189	Macaca mulatta	miR-133b-3p	mml-miR-133b-3p	20	100	9e-06	40.1
RNAseq_791	MIMAT0006128	Ciona savignyi	miR-133	csa-miR-133	20	100	9e-06	40.1
RNAseq_791	MIMAT0006997	Ornithorhynchus anatinus	miR-133b-3p	oan-miR-133b-3p	20	100	9e-06	40.1
RNAseq_791	MIMAT0003597	Xenopus tropicalis	miR-133b	xtr-miR-133b	20	100	9e-06	40.1
RNAseq_791	MIMAT0003126	Rattus norvegicus	miR-133b-3p	rno-miR-133b-3p	20	100	9e-06	40.1
RNAseq_791	MIMAT0001831	Danio rerio	miR-133b-3p	dre-miR-133b-3p	20	100	9e-06	40.1
RNAseq_791	MIMAT0001138	Gallus gallus	miR-133b	gga-miR-133b	20	100	9e-06	40.1
RNAseq_791	MIMAT0000770	Homo sapiens	miR-133b	hsa-miR-133b	20	100	9e-06	40.1
RNAseq_791	MIMAT0000769	Mus musculus	miR-133b-3p	mmu-miR-133b-3p	20	100	9e-06	40.1
RNAseq_791	MIMAT0011258	Schmidtea mediterranea	miR-133a-3p	sme-miR-133a-3p	22	95.45	0.0001	36.2
RNAseq_791	MIMAT0007150	Ornithorhynchus anatinus	miR-133c	oan-miR-133c	21	95.24	0.0006	34.2
RNAseq_791	MIMAT0029409	Ictalurus punctatus	miR-133c	ipu-miR-133c	20	95	0.002	32.2
RNAseq_791	MIMAT0001832	Danio rerio	miR-133c	dre-miR-133c	20	95	0.002	32.2
RNAseq_791	MIMAT0016264	Schistosoma japonicum	miR-133	sja-miR-133	22	90.91	0.035	28.2
RNAseq_834	MIMAT0014727	Acyrthosiphon pisum	miR-2a	api-miR-2a	24	100	4e-08	48.1
RNAseq_834	MIMAT0024972	Heliconius melpomene	miR-2b	hme-miR-2b	23	100	2e-07	46.1
RNAseq_834	MIMAT0024971	Heliconius melpomene	miR-2a	hme-miR-2a	23	100	2e-07	46.1
RNAseq_834	MIMAT0018427	Nasonia longicornis	miR-2	nlo-miR-2	23	100	2e-07	46.1
RNAseq_834	MIMAT0018393	Nasonia giraulti	miR-2	ngi-miR-2	23	100	2e-07	46.1
RNAseq_834	MIMAT0015663	Nasonia vitripennis	miR-2c	nvi-miR-2c	23	100	2e-07	46.1
RNAseq_834	MIMAT0014308	Aedes aegypti	miR-2c	aae-miR-2c	23	100	2e-07	46.1
RNAseq_834	MIMAT0014306	Aedes aegypti	miR-2b	aae-miR-2b	23	100	2e-07	46.1
RNAseq_834	MIMAT0012696	Ixodes scapularis	miR-2a	isc-miR-2a	23	100	2e-07	46.1
RNAseq_834	MIMAT0012657	Daphnia pulex	miR-2	dpu-miR-2	23	100	2e-07	46.1
RNAseq_834	MIMAT0009106	Drosophila yakuba	miR-2a	dya-miR-2a	23	100	2e-07	46.1
RNAseq_834	MIMAT0009006	Drosophila willistoni	miR-2a	dwi-miR-2a	23	100	2e-07	46.1
RNAseq_834	MIMAT0008909	Drosophila virilis	miR-2a	dvi-miR-2a	23	100	2e-07	46.1
RNAseq_834	MIMAT0008853	Drosophila simulans	miR-2a	dsi-miR-2a	23	100	2e-07	46.1
RNAseq_834	MIMAT0008819	Drosophila sechellia	miR-2a	dse-miR-2a	23	100	2e-07	46.1
RNAseq_834	MIMAT0008729	Drosophila persimilis	miR-2a	dpe-miR-2a	23	100	2e-07	46.1
RNAseq_834	MIMAT0008672	Drosophila mojavensis	miR-2a	dmo-miR-2a	23	100	2e-07	46.1
RNAseq_834	MIMAT0008607	Drosophila grimshawi	miR-2a	dgr-miR-2a	23	100	2e-07	46.1
RNAseq_834	MIMAT0008510	Drosophila erecta	miR-2a	der-miR-2a	23	100	2e-07	46.1
RNAseq_834	MIMAT0008414	Drosophila ananassae	miR-2a	dan-miR-2a	23	100	2e-07	46.1
RNAseq_834	MIMAT0019097	Tribolium castaneum	miR-2b-3p	tca-miR-2b-3p	23	100	2e-07	46.1
RNAseq_834	MIMAT0019095	Tribolium castaneum	miR-2a-3p	tca-miR-2a-3p	23	100	2e-07	46.1
RNAseq_834	MIMAT0008353	Tribolium castaneum	miR-2c-3p	tca-miR-2c-3p	23	100	2e-07	46.1
RNAseq_834	MIMAT0007894	Bombyx mori	miR-2a-3p	bmo-miR-2a-3p	23	100	2e-07	46.1
RNAseq_834	MIMAT0009202	Anopheles gambiae	miR-2	aga-miR-2	23	100	2e-07	46.1
RNAseq_834	MIMAT0001485	Apis mellifera	miR-2	ame-miR-2	23	100	2e-07	46.1
RNAseq_834	MIMAT0001200	Drosophila pseudoobscura	miR-2a	dps-miR-2a	23	100	2e-07	46.1
RNAseq_834	MIMAT0000106	Drosophila melanogaster	miR-2a-3p	dme-miR-2a-3p	23	100	2e-07	46.1
RNAseq_834	MIMAT0009558	Lottia gigantea	miR-2c	lgi-miR-2c	22	100	6e-07	44.1
RNAseq_834	MIMAT0024480	Manduca sexta	miR-2b	mse-miR-2b	21	100	2e-06	42.1
RNAseq_834	MIMAT0024479	Manduca sexta	miR-2a	mse-miR-2a	21	100	2e-06	42.1
RNAseq_834	MIMAT0023043	Tetranychus urticae	miR-2-3p	tur-miR-2-3p	21	100	2e-06	42.1
RNAseq_834	MIMAT0029723	Caenorhabditis brenneri	miR-2	cbn-miR-2	20	100	9e-06	40.1
RNAseq_834	MIMAT0029606	Caenorhabditis briggsae	miR-2	cbr-miR-2	20	100	9e-06	40.1
RNAseq_834	MIMAT0023415	Haemonchus contortus	miR-2	hco-miR-2	20	100	9e-06	40.1
RNAseq_834	MIMAT0021426	Ascaris suum	miR-2a-3p	asu-miR-2a-3p	20	100	9e-06	40.1
RNAseq_834	MIMAT0015667	Nasonia vitripennis	miR-2b	nvi-miR-2b	20	100	9e-06	40.1
RNAseq_834	MIMAT0014096	Brugia malayi	miR-2a	bma-miR-2a	20	100	9e-06	40.1
RNAseq_834	MIMAT0011574	Caenorhabditis remanei	miR-2-3p	crm-miR-2-3p	20	100	9e-06	40.1
RNAseq_834	MIMAT0009097	Drosophila yakuba	miR-2c	dya-miR-2c	20	100	9e-06	40.1
RNAseq_834	MIMAT0009035	Drosophila willistoni	miR-2c	dwi-miR-2c	20	100	9e-06	40.1
RNAseq_834	MIMAT0008910	Drosophila virilis	miR-2c	dvi-miR-2c	20	100	9e-06	40.1
RNAseq_834	MIMAT0008854	Drosophila simulans	miR-2c	dsi-miR-2c	20	100	9e-06	40.1
RNAseq_834	MIMAT0008777	Drosophila sechellia	miR-2c	dse-miR-2c	20	100	9e-06	40.1
RNAseq_834	MIMAT0008736	Drosophila persimilis	miR-2c	dpe-miR-2c	20	100	9e-06	40.1
RNAseq_834	MIMAT0008652	Drosophila mojavensis	miR-2c	dmo-miR-2c	20	100	9e-06	40.1
RNAseq_834	MIMAT0008626	Drosophila grimshawi	miR-2c	dgr-miR-2c	20	100	9e-06	40.1
RNAseq_834	MIMAT0008540	Drosophila erecta	miR-2c	der-miR-2c	20	100	9e-06	40.1
RNAseq_834	MIMAT0008442	Drosophila ananassae	miR-2c	dan-miR-2c	20	100	9e-06	40.1
RNAseq_834	MIMAT0001202	Drosophila pseudoobscura	miR-2c	dps-miR-2c	20	100	9e-06	40.1
RNAseq_834	MIMAT0000411	Drosophila melanogaster	miR-2c-3p	dme-miR-2c-3p	20	100	9e-06	40.1
RNAseq_834	MIMAT0000004	Caenorhabditis elegans	miR-2-3p	cel-miR-2-3p	20	100	9e-06	40.1
RNAseq_834	MIMAT0015666	Nasonia vitripennis	miR-2a	nvi-miR-2a	23	95.65	4e-05	38.2
RNAseq_834	MIMAT0014412	Culex quinquefasciatus	miR-2	cqu-miR-2	23	95.65	4e-05	38.2
RNAseq_834	MIMAT0014226	Aedes aegypti	miR-2a-3p	aae-miR-2a-3p	23	95.65	4e-05	38.2
RNAseq_834	MIMAT0012697	Ixodes scapularis	miR-2b	isc-miR-2b	23	95.65	4e-05	38.2
RNAseq_834	MIMAT0009075	Drosophila yakuba	miR-2b	dya-miR-2b	23	95.65	4e-05	38.2
RNAseq_834	MIMAT0009016	Drosophila willistoni	miR-2b	dwi-miR-2b	23	95.65	4e-05	38.2
RNAseq_834	MIMAT0008951	Drosophila virilis	miR-2b	dvi-miR-2b	23	95.65	4e-05	38.2
RNAseq_834	MIMAT0008858	Drosophila simulans	miR-2b	dsi-miR-2b	23	95.65	4e-05	38.2
RNAseq_834	MIMAT0008780	Drosophila sechellia	miR-2b	dse-miR-2b	23	95.65	4e-05	38.2
RNAseq_834	MIMAT0008738	Drosophila persimilis	miR-2b	dpe-miR-2b	23	95.65	4e-05	38.2
RNAseq_834	MIMAT0008650	Drosophila mojavensis	miR-2b	dmo-miR-2b	23	95.65	4e-05	38.2
RNAseq_834	MIMAT0008568	Drosophila grimshawi	miR-2b	dgr-miR-2b	23	95.65	4e-05	38.2
RNAseq_834	MIMAT0008535	Drosophila erecta	miR-2b	der-miR-2b	23	95.65	4e-05	38.2
RNAseq_834	MIMAT0008417	Drosophila ananassae	miR-2b	dan-miR-2b	23	95.65	4e-05	38.2
RNAseq_834	MIMAT0001201	Drosophila pseudoobscura	miR-2b	dps-miR-2b	23	95.65	4e-05	38.2
RNAseq_834	MIMAT0000107	Drosophila melanogaster	miR-2b-3p	dme-miR-2b-3p	23	95.65	4e-05	38.2
RNAseq_834	MIMAT0007895	Bombyx mori	miR-2b-3p	bmo-miR-2b-3p	22	95.45	0.0001	36.2
RNAseq_834	MIMAT0014713	Acyrthosiphon pisum	miR-13a	api-miR-13a	23	95.65	0.009	30.2
RNAseq_834	MIMAT0008359	Tribolium castaneum	miR-13a-3p	tca-miR-13a-3p	23	95.65	0.009	30.2
RNAseq_1092	MIMAT0028553	Monodelphis domestica	miR-137b-3p	mdo-miR-137b-3p	23	100	2e-07	46.1
RNAseq_1092	MIMAT0024939	Heliconius melpomene	miR-137	hme-miR-137	22	100	6e-07	44.1
RNAseq_1092	MIMAT0024458	Manduca sexta	miR-137	mse-miR-137	22	100	6e-07	44.1
RNAseq_1092	MIMAT0018423	Nasonia longicornis	miR-137	nlo-miR-137	22	100	6e-07	44.1
RNAseq_1092	MIMAT0018397	Nasonia giraulti	miR-137	ngi-miR-137	22	100	6e-07	44.1
RNAseq_1092	MIMAT0015660	Nasonia vitripennis	miR-137	nvi-miR-137	22	100	6e-07	44.1
RNAseq_1092	MIMAT0014413	Culex quinquefasciatus	miR-137	cqu-miR-137	22	100	6e-07	44.1
RNAseq_1092	MIMAT0014274	Aedes aegypti	miR-137	aae-miR-137	22	100	6e-07	44.1
RNAseq_1092	MIMAT0014126	Acyrthosiphon pisum	miR-137	api-miR-137	22	100	6e-07	44.1
RNAseq_1092	MIMAT0012494	Drosophila simulans	miR-137-3p	dsi-miR-137-3p	22	100	6e-07	44.1
RNAseq_1092	MIMAT0012238	Drosophila pseudoobscura	miR-137-3p	dps-miR-137-3p	22	100	6e-07	44.1
RNAseq_1092	MIMAT0010107	Anopheles gambiae	miR-137	aga-miR-137	22	100	6e-07	44.1
RNAseq_1092	MIMAT0009645	Strongylocentrotus purpuratus	miR-137	spu-miR-137	22	100	6e-07	44.1
RNAseq_1092	MIMAT0009628	Saccoglossus kowalevskii	miR-137	sko-miR-137	22	100	6e-07	44.1
RNAseq_1092	MIMAT0009527	Capitella teleta	miR-137	cte-miR-137	22	100	6e-07	44.1
RNAseq_1092	MIMAT0009152	Bombyx mori	miR-137	bmo-miR-137	22	100	6e-07	44.1
RNAseq_1092	MIMAT0008373	Tribolium castaneum	miR-137-3p	tca-miR-137-3p	22	100	6e-07	44.1
RNAseq_1092	MIMAT0005507	Drosophila melanogaster	miR-137-3p	dme-miR-137-3p	22	100	6e-07	44.1
RNAseq_1092	MIMAT0004421	Apis mellifera	miR-137	ame-miR-137	22	100	6e-07	44.1
RNAseq_1092	MIMAT0009581	Lottia gigantea	miR-137	lgi-miR-137	21	100	2e-06	42.1
RNAseq_1092	MIMAT0031590	Branchiostoma belcheri	miR-137-3p	bbe-miR-137-3p	20	100	9e-06	40.1
RNAseq_1092	MIMAT0023099	Tetranychus urticae	miR-137-3p	tur-miR-137-3p	20	100	9e-06	40.1
RNAseq_1092	MIMAT0020121	Xenoturbella bocki	miR-137	xbo-miR-137	20	100	9e-06	40.1
RNAseq_1092	MIMAT0012687	Ixodes scapularis	miR-137	isc-miR-137	20	100	9e-06	40.1
RNAseq_1092	MIMAT0012641	Daphnia pulex	miR-137	dpu-miR-137	20	100	9e-06	40.1
RNAseq_1092	MIMAT0009485	Branchiostoma floridae	miR-137	bfl-miR-137	20	100	9e-06	40.1
RNAseq_1092	MIMAT0021756	Anolis carolinensis	miR-137b-3p	aca-miR-137b-3p	23	95.65	4e-05	38.2
RNAseq_1092	MIMAT0019467	Petromyzon marinus	miR-137-3p	pma-miR-137-3p	23	95.65	4e-05	38.2
RNAseq_1092	MIMAT0006878	Ornithorhynchus anatinus	miR-137b-3p	oan-miR-137b-3p	23	95.65	4e-05	38.2
RNAseq_1092	MIMAT0002933	Tetraodon nigroviridis	miR-137	tni-miR-137	22	95.45	0.0001	36.2
RNAseq_1092	MIMAT0002932	Fugu rubripes	miR-137	fru-miR-137	22	95.45	0.0001	36.2
RNAseq_1092	MIMAT0022577	Oryzias latipes	miR-137	ola-miR-137	20	95	0.002	32.2
RNAseq_1277	MIMAT0024481	Manduca sexta	miR-71	mse-miR-71	23	100	2e-07	46.1
RNAseq_1277	MIMAT0023040	Tetranychus urticae	miR-71-5p	tur-miR-71-5p	23	100	2e-07	46.1
RNAseq_1277	MIMAT0014735	Acyrthosiphon pisum	miR-71	api-miR-71	23	100	2e-07	46.1
RNAseq_1277	MIMAT0012703	Ixodes scapularis	miR-71	isc-miR-71	23	100	2e-07	46.1
RNAseq_1277	MIMAT0012667	Daphnia pulex	miR-71	dpu-miR-71	23	100	2e-07	46.1
RNAseq_1277	MIMAT0009517	Capitella teleta	miR-71	cte-miR-71	23	100	2e-07	46.1
RNAseq_1277	MIMAT0031717	Branchiostoma belcheri	miR-71-5p	bbe-miR-71-5p	22	100	6e-07	44.1
RNAseq_1277	MIMAT0009660	Strongylocentrotus purpuratus	miR-71	spu-miR-71	22	100	6e-07	44.1
RNAseq_1277	MIMAT0009476	Branchiostoma floridae	miR-71-5p	bfl-miR-71-5p	22	100	6e-07	44.1
RNAseq_1277	MIMAT0008365	Tribolium castaneum	miR-71-5p	tca-miR-71-5p	22	100	6e-07	44.1
RNAseq_1277	MIMAT0003987	Schmidtea mediterranea	miR-71c-5p	sme-miR-71c-5p	22	100	6e-07	44.1
RNAseq_1277	MIMAT0030460	Panagrellus redivivus	miR-71-5p	prd-miR-71-5p	21	100	2e-06	42.1
RNAseq_1277	MIMAT0023358	Haemonchus contortus	miR-71	hco-miR-71	21	100	2e-06	42.1
RNAseq_1277	MIMAT0021466	Ascaris suum	miR-71-5p	asu-miR-71-5p	21	100	2e-06	42.1
RNAseq_1277	MIMAT0014400	Culex quinquefasciatus	miR-71-5p	cqu-miR-71-5p	21	100	2e-06	42.1
RNAseq_1277	MIMAT0014220	Aedes aegypti	miR-71-5p	aae-miR-71-5p	21	100	2e-06	42.1
RNAseq_1277	MIMAT0011618	Caenorhabditis remanei	miR-71-5p	crm-miR-71-5p	21	100	2e-06	42.1
RNAseq_1277	MIMAT0000043	Caenorhabditis elegans	miR-71-5p	cel-miR-71-5p	21	100	2e-06	42.1
RNAseq_1277	MIMAT0009571	Lottia gigantea	miR-71	lgi-miR-71	23	95.65	4e-05	38.2
RNAseq_1277	MIMAT0003984	Schmidtea mediterranea	miR-71a-5p	sme-miR-71a-5p	22	95.45	0.0001	36.2
RNAseq_1277	MIMAT0009617	Saccoglossus kowalevskii	miR-71	sko-miR-71	22	90.91	0.035	28.2
RNAseq_1344	MIMAT0031714	Branchiostoma belcheri	miR-7-5p	bbe-miR-7-5p	23	100	2e-07	46.1
RNAseq_1344	MIMAT0029526	Ictalurus punctatus	miR-7a	ipu-miR-7a	23	100	2e-07	46.1
RNAseq_1344	MIMAT0026319	Cyprinus carpio	miR-7a	ccr-miR-7a	23	100	2e-07	46.1
RNAseq_1344	MIMAT0024426	Manduca sexta	miR-7	mse-miR-7	23	100	2e-07	46.1
RNAseq_1344	MIMAT0022641	Oryzias latipes	miR-7	ola-miR-7	23	100	2e-07	46.1
RNAseq_1344	MIMAT0023036	Tetranychus urticae	miR-7-5p	tur-miR-7-5p	23	100	2e-07	46.1
RNAseq_1344	MIMAT0021983	Anolis carolinensis	miR-7-5p	aca-miR-7-5p	23	100	2e-07	46.1
RNAseq_1344	MIMAT0022741	Homo sapiens	miR-3529-3p	hsa-miR-3529-3p	23	100	2e-07	46.1
RNAseq_1344	MIMAT0019370	Petromyzon marinus	miR-7a-5p	pma-miR-7a-5p	23	100	2e-07	46.1
RNAseq_1344	MIMAT0020368	Cricetulus griseus	miR-7a	cgr-miR-7a	23	100	2e-07	46.1
RNAseq_1344	MIMAT0018436	Nasonia longicornis	miR-7	nlo-miR-7	23	100	2e-07	46.1
RNAseq_1344	MIMAT0015659	Nasonia vitripennis	miR-7	nvi-miR-7	23	100	2e-07	46.1
RNAseq_1344	MIMAT0014734	Acyrthosiphon pisum	miR-7	api-miR-7	23	100	2e-07	46.1
RNAseq_1344	MIMAT0014510	Taeniopygia guttata	miR-7-5p	tgu-miR-7-5p	23	100	2e-07	46.1
RNAseq_1344	MIMAT0014423	Culex quinquefasciatus	miR-7	cqu-miR-7	23	100	2e-07	46.1
RNAseq_1344	MIMAT0014290	Aedes aegypti	miR-7	aae-miR-7	23	100	2e-07	46.1
RNAseq_1344	MIMAT0012905	Equus caballus	miR-7	eca-miR-7	23	100	2e-07	46.1
RNAseq_1344	MIMAT0012702	Ixodes scapularis	miR-7	isc-miR-7	23	100	2e-07	46.1
RNAseq_1344	MIMAT0012666	Daphnia pulex	miR-7	dpu-miR-7	23	100	2e-07	46.1
RNAseq_1344	MIMAT0009651	Strongylocentrotus purpuratus	miR-7	spu-miR-7	23	100	2e-07	46.1
RNAseq_1344	MIMAT0009608	Saccoglossus kowalevskii	miR-7-5p	sko-miR-7-5p	23	100	2e-07	46.1
RNAseq_1344	MIMAT0009560	Lottia gigantea	miR-7	lgi-miR-7	23	100	2e-07	46.1
RNAseq_1344	MIMAT0009464	Branchiostoma floridae	miR-7	bfl-miR-7	23	100	2e-07	46.1
RNAseq_1344	MIMAT0009119	Drosophila yakuba	miR-7	dya-miR-7	23	100	2e-07	46.1
RNAseq_1344	MIMAT0009009	Drosophila willistoni	miR-7	dwi-miR-7	23	100	2e-07	46.1
RNAseq_1344	MIMAT0008931	Drosophila virilis	miR-7	dvi-miR-7	23	100	2e-07	46.1
RNAseq_1344	MIMAT0008901	Drosophila simulans	miR-7	dsi-miR-7	23	100	2e-07	46.1
RNAseq_1344	MIMAT0008771	Drosophila sechellia	miR-7	dse-miR-7	23	100	2e-07	46.1
RNAseq_1344	MIMAT0008742	Drosophila persimilis	miR-7	dpe-miR-7	23	100	2e-07	46.1
RNAseq_1344	MIMAT0008692	Drosophila mojavensis	miR-7	dmo-miR-7	23	100	2e-07	46.1
RNAseq_1344	MIMAT0008622	Drosophila grimshawi	miR-7	dgr-miR-7	23	100	2e-07	46.1
RNAseq_1344	MIMAT0008537	Drosophila erecta	miR-7	der-miR-7	23	100	2e-07	46.1
RNAseq_1344	MIMAT0008410	Drosophila ananassae	miR-7	dan-miR-7	23	100	2e-07	46.1
RNAseq_1344	MIMAT0008355	Tribolium castaneum	miR-7-5p	tca-miR-7-5p	23	100	2e-07	46.1
RNAseq_1344	MIMAT0006634	Canis familiaris	miR-7	cfa-miR-7	23	100	2e-07	46.1
RNAseq_1344	MIMAT0006159	Macaca mulatta	miR-7	mml-miR-7	23	100	2e-07	46.1
RNAseq_1344	MIMAT0006120	Ciona savignyi	miR-7	csa-miR-7	23	100	2e-07	46.1
RNAseq_1344	MIMAT0006986	Ornithorhynchus anatinus	miR-7-5p	oan-miR-7-5p	23	100	2e-07	46.1
RNAseq_1344	MIMAT0003843	Bos taurus	miR-7	bta-miR-7	23	100	2e-07	46.1
RNAseq_1344	MIMAT0004192	Bombyx mori	miR-7-5p	bmo-miR-7-5p	23	100	2e-07	46.1
RNAseq_1344	MIMAT0003010	Tetraodon nigroviridis	miR-7	tni-miR-7	23	100	2e-07	46.1
RNAseq_1344	MIMAT0002485	Pan troglodytes	miR-7	ptr-miR-7	23	100	2e-07	46.1
RNAseq_1344	MIMAT0002141	Sus scrofa	miR-7	ssc-miR-7	23	100	2e-07	46.1
RNAseq_1344	MIMAT0001523	Anopheles gambiae	miR-7	aga-miR-7	23	100	2e-07	46.1
RNAseq_1344	MIMAT0001489	Apis mellifera	miR-7	ame-miR-7	23	100	2e-07	46.1
RNAseq_1344	MIMAT0001266	Danio rerio	miR-7a	dre-miR-7a	23	100	2e-07	46.1
RNAseq_1344	MIMAT0001209	Drosophila pseudoobscura	miR-7	dps-miR-7	23	100	2e-07	46.1
RNAseq_1344	MIMAT0000677	Mus musculus	miR-7a-5p	mmu-miR-7a-5p	23	100	2e-07	46.1
RNAseq_1344	MIMAT0000606	Rattus norvegicus	miR-7a-5p	rno-miR-7a-5p	23	100	2e-07	46.1
RNAseq_1344	MIMAT0000252	Homo sapiens	miR-7-5p	hsa-miR-7-5p	23	100	2e-07	46.1
RNAseq_1344	MIMAT0000112	Drosophila melanogaster	miR-7-5p	dme-miR-7-5p	23	100	2e-07	46.1
RNAseq_1344	MIMAT0024984	Heliconius melpomene	miR-7	hme-miR-7	22	100	6e-07	44.1
RNAseq_1344	MIMAT0006091	Ciona intestinalis	miR-7-5p	cin-miR-7-5p	22	100	6e-07	44.1
RNAseq_1344	MIMAT0006078	Oikopleura dioica	miR-7	odi-miR-7	22	100	6e-07	44.1
RNAseq_1344	MIMAT0004086	Monodelphis domestica	miR-7	mdo-miR-7	22	100	6e-07	44.1
RNAseq_1344	MIMAT0003552	Xenopus tropicalis	miR-7	xtr-miR-7	22	100	6e-07	44.1
RNAseq_1344	MIMAT0001157	Gallus gallus	miR-7	gga-miR-7	22	100	6e-07	44.1
RNAseq_1344	MIMAT0003009	Fugu rubripes	miR-7	fru-miR-7	21	100	2e-06	42.1
RNAseq_1344	MIMAT0002484	Pan paniscus	miR-7	ppa-miR-7	21	100	2e-06	42.1
RNAseq_1344	MIMAT0002483	Macaca nemestrina	miR-7	mne-miR-7	21	100	2e-06	42.1
RNAseq_1344	MIMAT0002482	Lagothrix lagotricha	miR-7	lla-miR-7	21	100	2e-06	42.1
RNAseq_1344	MIMAT0002481	Saguinus labiatus	miR-7	sla-miR-7	21	100	2e-06	42.1
RNAseq_1344	MIMAT0002480	Pongo pygmaeus	miR-7	ppy-miR-7	21	100	2e-06	42.1
RNAseq_1344	MIMAT0002479	Gorilla gorilla	miR-7	ggo-miR-7	21	100	2e-06	42.1
RNAseq_1344	MIMAT0029527	Ictalurus punctatus	miR-7b	ipu-miR-7b	23	95.65	4e-05	38.2
RNAseq_1344	MIMAT0026320	Cyprinus carpio	miR-7b	ccr-miR-7b	23	95.65	4e-05	38.2
RNAseq_1344	MIMAT0024004	Cricetulus griseus	miR-7b	cgr-miR-7b	23	95.65	4e-05	38.2
RNAseq_1344	MIMAT0021429	Ascaris suum	miR-7-5p	asu-miR-7-5p	23	95.65	4e-05	38.2
RNAseq_1344	MIMAT0014099	Brugia malayi	miR-7	bma-miR-7	23	95.65	4e-05	38.2
RNAseq_1344	MIMAT0011253	Schmidtea mediterranea	miR-7d-5p	sme-miR-7d-5p	23	95.65	4e-05	38.2
RNAseq_1344	MIMAT0009506	Capitella teleta	miR-7	cte-miR-7	23	95.65	4e-05	38.2
RNAseq_1344	MIMAT0000780	Rattus norvegicus	miR-7b	rno-miR-7b	23	95.65	4e-05	38.2
RNAseq_1344	MIMAT0000678	Mus musculus	miR-7b-5p	mmu-miR-7b-5p	23	95.65	4e-05	38.2
RNAseq_1344	MIMAT0001265	Danio rerio	miR-7b	dre-miR-7b	21	95.24	0.0006	34.2
RNAseq_1376	MIMAT0030494	Panagrellus redivivus	miR-34-5p	prd-miR-34-5p	22	100	6e-07	44.1
RNAseq_1376	MIMAT0024983	Heliconius melpomene	miR-34	hme-miR-34	22	100	6e-07	44.1
RNAseq_1376	MIMAT0024475	Manduca sexta	miR-34	mse-miR-34	22	100	6e-07	44.1
RNAseq_1376	MIMAT0021437	Ascaris suum	miR-34-5p	asu-miR-34-5p	22	100	6e-07	44.1
RNAseq_1376	MIMAT0015682	Nasonia vitripennis	miR-34	nvi-miR-34	22	100	6e-07	44.1
RNAseq_1376	MIMAT0014245	Aedes aegypti	miR-34-5p	aae-miR-34-5p	22	100	6e-07	44.1
RNAseq_1376	MIMAT0014101	Brugia malayi	miR-34	bma-miR-34	22	100	6e-07	44.1
RNAseq_1376	MIMAT0012663	Daphnia pulex	miR-34	dpu-miR-34	22	100	6e-07	44.1
RNAseq_1376	MIMAT0009616	Saccoglossus kowalevskii	miR-34-5p	sko-miR-34-5p	22	100	6e-07	44.1
RNAseq_1376	MIMAT0009516	Capitella teleta	miR-34	cte-miR-34	22	100	6e-07	44.1
RNAseq_1376	MIMAT0009081	Drosophila yakuba	miR-34	dya-miR-34	22	100	6e-07	44.1
RNAseq_1376	MIMAT0008983	Drosophila willistoni	miR-34	dwi-miR-34	22	100	6e-07	44.1
RNAseq_1376	MIMAT0008955	Drosophila virilis	miR-34	dvi-miR-34	22	100	6e-07	44.1
RNAseq_1376	MIMAT0008840	Drosophila simulans	miR-34	dsi-miR-34	22	100	6e-07	44.1
RNAseq_1376	MIMAT0008787	Drosophila sechellia	miR-34	dse-miR-34	22	100	6e-07	44.1
RNAseq_1376	MIMAT0008715	Drosophila persimilis	miR-34	dpe-miR-34	22	100	6e-07	44.1
RNAseq_1376	MIMAT0008656	Drosophila mojavensis	miR-34	dmo-miR-34	22	100	6e-07	44.1
RNAseq_1376	MIMAT0008619	Drosophila grimshawi	miR-34	dgr-miR-34	22	100	6e-07	44.1
RNAseq_1376	MIMAT0008508	Drosophila erecta	miR-34	der-miR-34	22	100	6e-07	44.1
RNAseq_1376	MIMAT0008439	Drosophila ananassae	miR-34	dan-miR-34	22	100	6e-07	44.1
RNAseq_1376	MIMAT0004197	Bombyx mori	miR-34-5p	bmo-miR-34-5p	22	100	6e-07	44.1
RNAseq_1376	MIMAT0001223	Drosophila pseudoobscura	miR-34	dps-miR-34	22	100	6e-07	44.1
RNAseq_1376	MIMAT0000350	Drosophila melanogaster	miR-34-5p	dme-miR-34-5p	22	100	6e-07	44.1
RNAseq_1376	MIMAT0023096	Tetranychus urticae	miR-34-5p	tur-miR-34-5p	21	100	2e-06	42.1
RNAseq_1376	MIMAT0018435	Nasonia longicornis	miR-34	nlo-miR-34	21	100	2e-06	42.1
RNAseq_1376	MIMAT0018390	Nasonia giraulti	miR-34	ngi-miR-34	21	100	2e-06	42.1
RNAseq_1376	MIMAT0011538	Caenorhabditis remanei	miR-34	crm-miR-34	21	100	2e-06	42.1
RNAseq_1376	MIMAT0000466	Caenorhabditis briggsae	miR-34	cbr-miR-34	21	100	2e-06	42.1
RNAseq_1376	MIMAT0000005	Caenorhabditis elegans	miR-34-5p	cel-miR-34-5p	21	100	2e-06	42.1
RNAseq_1376	MIMAT0009569	Lottia gigantea	miR-34	lgi-miR-34	20	100	9e-06	40.1
RNAseq_1376	MIMAT0008364	Tribolium castaneum	miR-34-5p	tca-miR-34-5p	20	100	9e-06	40.1
RNAseq_1376	MIMAT0005526	Anopheles gambiae	miR-34	aga-miR-34	20	100	9e-06	40.1
RNAseq_1376	MIMAT0004430	Apis mellifera	miR-34	ame-miR-34	22	95.45	0.0001	36.2
RNAseq_1376	MIMAT0009659	Strongylocentrotus purpuratus	miR-34	spu-miR-34	21	95.24	0.0006	34.2
RNAseq_1635	MIMAT0024456	Manduca sexta	miR-8	mse-miR-8	23	100	2e-07	46.1
RNAseq_1635	MIMAT0018437	Nasonia longicornis	miR-8	nlo-miR-8	23	100	2e-07	46.1
RNAseq_1635	MIMAT0015698	Nasonia vitripennis	miR-8	nvi-miR-8	23	100	2e-07	46.1
RNAseq_1635	MIMAT0014215	Aedes aegypti	miR-8-3p	aae-miR-8-3p	23	100	2e-07	46.1
RNAseq_1635	MIMAT0012706	Ixodes scapularis	miR-8	isc-miR-8	23	100	2e-07	46.1
RNAseq_1635	MIMAT0012669	Daphnia pulex	miR-8	dpu-miR-8	23	100	2e-07	46.1
RNAseq_1635	MIMAT0009561	Lottia gigantea	miR-8	lgi-miR-8	23	100	2e-07	46.1
RNAseq_1635	MIMAT0009507	Capitella teleta	miR-8	cte-miR-8	23	100	2e-07	46.1
RNAseq_1635	MIMAT0009066	Drosophila yakuba	miR-8	dya-miR-8	23	100	2e-07	46.1
RNAseq_1635	MIMAT0009013	Drosophila willistoni	miR-8	dwi-miR-8	23	100	2e-07	46.1
RNAseq_1635	MIMAT0008954	Drosophila virilis	miR-8	dvi-miR-8	23	100	2e-07	46.1
RNAseq_1635	MIMAT0008889	Drosophila simulans	miR-8	dsi-miR-8	23	100	2e-07	46.1
RNAseq_1635	MIMAT0008772	Drosophila sechellia	miR-8	dse-miR-8	23	100	2e-07	46.1
RNAseq_1635	MIMAT0008710	Drosophila persimilis	miR-8	dpe-miR-8	23	100	2e-07	46.1
RNAseq_1635	MIMAT0008647	Drosophila mojavensis	miR-8	dmo-miR-8	23	100	2e-07	46.1
RNAseq_1635	MIMAT0008593	Drosophila grimshawi	miR-8	dgr-miR-8	23	100	2e-07	46.1
RNAseq_1635	MIMAT0008499	Drosophila erecta	miR-8	der-miR-8	23	100	2e-07	46.1
RNAseq_1635	MIMAT0008408	Drosophila ananassae	miR-8	dan-miR-8	23	100	2e-07	46.1
RNAseq_1635	MIMAT0008356	Tribolium castaneum	miR-8-3p	tca-miR-8-3p	23	100	2e-07	46.1
RNAseq_1635	MIMAT0004193	Bombyx mori	miR-8-3p	bmo-miR-8-3p	23	100	2e-07	46.1
RNAseq_1635	MIMAT0001525	Anopheles gambiae	miR-8	aga-miR-8	23	100	2e-07	46.1
RNAseq_1635	MIMAT0001490	Apis mellifera	miR-8	ame-miR-8	23	100	2e-07	46.1
RNAseq_1635	MIMAT0001210	Drosophila pseudoobscura	miR-8	dps-miR-8	23	100	2e-07	46.1
RNAseq_1635	MIMAT0000113	Drosophila melanogaster	miR-8-3p	dme-miR-8-3p	23	100	2e-07	46.1
RNAseq_1635	MIMAT0024988	Heliconius melpomene	miR-8	hme-miR-8	22	100	6e-07	44.1
RNAseq_1635	MIMAT0014409	Culex quinquefasciatus	miR-8-3p	cqu-miR-8-3p	22	100	6e-07	44.1
RNAseq_1635	MIMAT0014737	Acyrthosiphon pisum	miR-8	api-miR-8	23	95.65	4e-05	38.2
RNAseq_1635	MIMAT0010149	Locusta migratoria	miR-8-3p	lmi-miR-8-3p	23	95.65	4e-05	38.2
RNAseq_1635	MIMAT0025046	Schistosoma mansoni	miR-8-3p	sma-miR-8-3p	21	95.24	0.0006	34.2
RNAseq_1635	MIMAT0023379	Haemonchus contortus	miR-236	hco-miR-236	21	95.24	0.0006	34.2
RNAseq_1635	MIMAT0016252	Schistosoma japonicum	miR-8-3p	sja-miR-8-3p	21	95.24	0.0006	34.2
RNAseq_1635	MIMAT0003972	Schmidtea mediterranea	miR-8a-3p	sme-miR-8a-3p	21	95.24	0.0006	34.2
RNAseq_1787	MIMAT0022813	Sarcophilus harrisii	miR-21	sha-miR-21	23	100	2e-07	46.1
RNAseq_1787	MIMAT0014966	Ovis aries	miR-21	oar-miR-21	23	100	2e-07	46.1
RNAseq_1787	MIMAT0003528	Bos taurus	miR-21-5p	bta-miR-21-5p	23	100	2e-07	46.1
RNAseq_1787	MIMAT0021865	Anolis carolinensis	miR-21-5p	aca-miR-21-5p	22	100	6e-07	44.1
RNAseq_1787	MIMAT0014527	Taeniopygia guttata	miR-21-5p	tgu-miR-21-5p	22	100	6e-07	44.1
RNAseq_1787	MIMAT0013029	Equus caballus	miR-21	eca-miR-21	22	100	6e-07	44.1
RNAseq_1787	MIMAT0006741	Canis familiaris	miR-21	cfa-miR-21	22	100	6e-07	44.1
RNAseq_1787	MIMAT0007160	Ornithorhynchus anatinus	miR-21-5p	oan-miR-21-5p	22	100	6e-07	44.1
RNAseq_1787	MIMAT0004417	Cricetulus griseus	miR-21-5p	cgr-miR-21-5p	22	100	6e-07	44.1
RNAseq_1787	MIMAT0004091	Monodelphis domestica	miR-21-5p	mdo-miR-21-5p	22	100	6e-07	44.1
RNAseq_1787	MIMAT0003774	Gallus gallus	miR-21-5p	gga-miR-21-5p	22	100	6e-07	44.1
RNAseq_1787	MIMAT0002326	Pan paniscus	miR-21	ppa-miR-21	22	100	6e-07	44.1
RNAseq_1787	MIMAT0002325	Ateles geoffroyi	miR-21	age-miR-21	22	100	6e-07	44.1
RNAseq_1787	MIMAT0002324	Macaca nemestrina	miR-21	mne-miR-21	22	100	6e-07	44.1
RNAseq_1787	MIMAT0002323	Pongo pygmaeus	miR-21	ppy-miR-21	22	100	6e-07	44.1
RNAseq_1787	MIMAT0002322	Gorilla gorilla	miR-21	ggo-miR-21	22	100	6e-07	44.1
RNAseq_1787	MIMAT0002321	Pan troglodytes	miR-21	ptr-miR-21	22	100	6e-07	44.1
RNAseq_1787	MIMAT0002320	Macaca mulatta	miR-21-5p	mml-miR-21-5p	22	100	6e-07	44.1
RNAseq_1787	MIMAT0002165	Sus scrofa	miR-21	ssc-miR-21	22	100	6e-07	44.1
RNAseq_1787	MIMAT0000790	Rattus norvegicus	miR-21-5p	rno-miR-21-5p	22	100	6e-07	44.1
RNAseq_1787	MIMAT0000530	Mus musculus	miR-21a-5p	mmu-miR-21a-5p	22	100	6e-07	44.1
RNAseq_1787	MIMAT0000076	Homo sapiens	miR-21-5p	hsa-miR-21-5p	22	100	6e-07	44.1
RNAseq_1787	MIMAT0030359	Hippoglossus hippoglossus	miR-21	hhi-miR-21	21	95.24	0.0006	34.2
RNAseq_1787	MIMAT0029463	Ictalurus punctatus	miR-21	ipu-miR-21	21	95.24	0.0006	34.2
RNAseq_1787	MIMAT0026267	Cyprinus carpio	miR-21	ccr-miR-21	21	95.24	0.0006	34.2
RNAseq_1787	MIMAT0025424	Paralichthys olivaceus	miR-21-5p	pol-miR-21-5p	21	95.24	0.0006	34.2
RNAseq_1787	MIMAT0022619	Oryzias latipes	miR-21	ola-miR-21	21	95.24	0.0006	34.2
RNAseq_1787	MIMAT0003000	Tetraodon nigroviridis	miR-21	tni-miR-21	21	95.24	0.0006	34.2
RNAseq_1787	MIMAT0002999	Fugu rubripes	miR-21	fru-miR-21	21	95.24	0.0006	34.2
RNAseq_1787	MIMAT0001787	Danio rerio	miR-21	dre-miR-21	21	95.24	0.0006	34.2
RNAseq_1794	MIMAT0024459	Manduca sexta	miR-iab-4-5p	mse-miR-iab-4-5p	21	100	2e-06	42.1
RNAseq_1794	MIMAT0018411	Nasonia giraulti	miR-iab-4	ngi-miR-iab-4	21	100	2e-06	42.1
RNAseq_1794	MIMAT0014357	Culex quinquefasciatus	miR-iab-4	cqu-miR-iab-4	21	100	2e-06	42.1
RNAseq_1794	MIMAT0014278	Aedes aegypti	miR-iab-4-5p	aae-miR-iab-4-5p	21	100	2e-06	42.1
RNAseq_1794	MIMAT0012677	Daphnia pulex	miR-iab-4-5p	dpu-miR-iab-4-5p	21	100	2e-06	42.1
RNAseq_1794	MIMAT0009162	Bombyx mori	miR-iab-4-5p	bmo-miR-iab-4-5p	21	100	2e-06	42.1
RNAseq_1794	MIMAT0009089	Drosophila yakuba	miR-iab-4-5p	dya-miR-iab-4-5p	21	100	2e-06	42.1
RNAseq_1794	MIMAT0009004	Drosophila willistoni	miR-iab-4-5p	dwi-miR-iab-4-5p	21	100	2e-06	42.1
RNAseq_1794	MIMAT0008963	Drosophila virilis	miR-iab-4-5p	dvi-miR-iab-4-5p	21	100	2e-06	42.1
RNAseq_1794	MIMAT0008855	Drosophila simulans	miR-iab-4-5p	dsi-miR-iab-4-5p	21	100	2e-06	42.1
RNAseq_1794	MIMAT0008832	Drosophila sechellia	miR-iab-4-5p	dse-miR-iab-4-5p	21	100	2e-06	42.1
RNAseq_1794	MIMAT0008740	Drosophila persimilis	miR-iab-4-5p	dpe-miR-iab-4-5p	21	100	2e-06	42.1
RNAseq_1794	MIMAT0008680	Drosophila mojavensis	miR-iab-4-5p	dmo-miR-iab-4-5p	21	100	2e-06	42.1
RNAseq_1794	MIMAT0008578	Drosophila grimshawi	miR-iab-4-5p	dgr-miR-iab-4-5p	21	100	2e-06	42.1
RNAseq_1794	MIMAT0008523	Drosophila erecta	miR-iab-4-5p	der-miR-iab-4-5p	21	100	2e-06	42.1
RNAseq_1794	MIMAT0008440	Drosophila ananassae	miR-iab-4-5p	dan-miR-iab-4-5p	21	100	2e-06	42.1
RNAseq_1794	MIMAT0008393	Tribolium castaneum	miR-iab-4-5p	tca-miR-iab-4-5p	21	100	2e-06	42.1
RNAseq_1794	MIMAT0001531	Anopheles gambiae	miR-iab-4	aga-miR-iab-4	21	100	2e-06	42.1
RNAseq_1794	MIMAT0001493	Apis mellifera	miR-iab-4	ame-miR-iab-4	21	100	2e-06	42.1
RNAseq_1794	MIMAT0001205	Drosophila pseudoobscura	miR-iab-4-5p	dps-miR-iab-4-5p	21	100	2e-06	42.1
RNAseq_1794	MIMAT0000412	Drosophila melanogaster	miR-iab-4-5p	dme-miR-iab-4-5p	21	100	2e-06	42.1
RNAseq_1794	MIMAT0012505	Drosophila simulans	miR-iab-8-3p	dsi-miR-iab-8-3p	20	100	9e-06	40.1
RNAseq_1794	MIMAT0012285	Drosophila pseudoobscura	miR-iab-8-3p	dps-miR-iab-8-3p	20	100	9e-06	40.1
RNAseq_1794	MIMAT0014129	Acyrthosiphon pisum	miR-iab-4	api-miR-iab-4	21	95.24	0.0006	34.2
RNAseq_1855	MIMAT0013613	Bombyx mori	miR-1175-3p	bmo-miR-1175-3p	22	95.45	0.0001	36.2
RNAseq_1855	MIMAT0009603	Lottia gigantea	miR-1175-3p	lgi-miR-1175-3p	21	95.24	0.0006	34.2
RNAseq_1855	MIMAT0009550	Capitella teleta	miR-1175-3p	cte-miR-1175-3p	21	95.24	0.0006	34.2
RNAseq_2196	MIMAT0014657	Taeniopygia guttata	miR-30d-5p	tgu-miR-30d-5p	24	95.83	9e-06	40.1
RNAseq_2196	MIMAT0013871	Sus scrofa	miR-30d	ssc-miR-30d	24	95.83	9e-06	40.1
RNAseq_2196	MIMAT0006616	Canis familiaris	miR-30d	cfa-miR-30d	24	95.83	9e-06	40.1
RNAseq_2196	MIMAT0003533	Bos taurus	miR-30d	bta-miR-30d	24	95.83	9e-06	40.1
RNAseq_2196	MIMAT0019427	Petromyzon marinus	miR-30d	pma-miR-30d	24	91.67	0.002	32.2
RNAseq_2196	MIMAT0019424	Petromyzon marinus	miR-30b	pma-miR-30b	24	91.67	0.002	32.2
RNAseq_2196	MIMAT0003841	Bos taurus	miR-30a-5p	bta-miR-30a-5p	24	91.67	0.002	32.2
RNAseq_2287	MIMAT0012644	Daphnia pulex	miR-283	dpu-miR-283	20	100	9e-06	40.1
RNAseq_2287	MIMAT0024469	Manduca sexta	miR-283	mse-miR-283	23	95.65	4e-05	38.2
RNAseq_2287	MIMAT0014379	Culex quinquefasciatus	miR-283	cqu-miR-283	22	95.45	0.0001	36.2
RNAseq_2287	MIMAT0014279	Aedes aegypti	miR-283	aae-miR-283	22	95.45	0.0001	36.2
RNAseq_2287	MIMAT0000347	Drosophila melanogaster	miR-283-5p	dme-miR-283-5p	22	95.45	0.0001	36.2
RNAseq_2303	MIMAT0007584	Gallus gallus	miR-1692	gga-miR-1692	20	100	9e-06	40.1
RNAseq_2859	MIMAT0012704	Ixodes scapularis	miR-750	isc-miR-750	23	95.65	4e-05	38.2
RNAseq_2859	MIMAT0009547	Capitella teleta	miR-750	cte-miR-750	23	95.65	4e-05	38.2
RNAseq_2859	MIMAT0018615	Apis mellifera	miR-750	ame-miR-750	22	95.45	0.0001	36.2
RNAseq_2859	MIMAT0009600	Lottia gigantea	miR-750	lgi-miR-750	22	95.45	0.0001	36.2
RNAseq_2859	MIMAT0024457	Manduca sexta	miR-750	mse-miR-750	23	95.65	0.009	30.2
RNAseq_3131	MIMAT0012659	Daphnia pulex	miR-31	dpu-miR-31	23	100	2e-07	46.1
RNAseq_3131	MIMAT0018434	Nasonia longicornis	miR-31a	nlo-miR-31a	22	100	6e-07	44.1
RNAseq_3131	MIMAT0018387	Nasonia giraulti	miR-31a	ngi-miR-31a	22	100	6e-07	44.1
RNAseq_3131	MIMAT0015661	Nasonia vitripennis	miR-31a	nvi-miR-31a	22	100	6e-07	44.1
RNAseq_3131	MIMAT0009103	Drosophila yakuba	miR-31a	dya-miR-31a	22	100	6e-07	44.1
RNAseq_3131	MIMAT0009044	Drosophila willistoni	miR-31a	dwi-miR-31a	22	100	6e-07	44.1
RNAseq_3131	MIMAT0008967	Drosophila virilis	miR-31a	dvi-miR-31a	22	100	6e-07	44.1
RNAseq_3131	MIMAT0008886	Drosophila simulans	miR-31a	dsi-miR-31a	22	100	6e-07	44.1
RNAseq_3131	MIMAT0008825	Drosophila sechellia	miR-31a	dse-miR-31a	22	100	6e-07	44.1
RNAseq_3131	MIMAT0008723	Drosophila persimilis	miR-31a	dpe-miR-31a	22	100	6e-07	44.1
RNAseq_3131	MIMAT0008677	Drosophila mojavensis	miR-31a	dmo-miR-31a	22	100	6e-07	44.1
RNAseq_3131	MIMAT0008585	Drosophila grimshawi	miR-31a	dgr-miR-31a	22	100	6e-07	44.1
RNAseq_3131	MIMAT0008519	Drosophila erecta	miR-31a	der-miR-31a	22	100	6e-07	44.1
RNAseq_3131	MIMAT0008477	Drosophila ananassae	miR-31a	dan-miR-31a	22	100	6e-07	44.1
RNAseq_3131	MIMAT0004428	Apis mellifera	miR-31a	ame-miR-31a	22	100	6e-07	44.1
RNAseq_3131	MIMAT0001220	Drosophila pseudoobscura	miR-31a	dps-miR-31a	22	100	6e-07	44.1
RNAseq_3131	MIMAT0000400	Drosophila melanogaster	miR-31a-5p	dme-miR-31a-5p	22	100	6e-07	44.1
RNAseq_3131	MIMAT0008362	Tribolium castaneum	miR-31-5p	tca-miR-31-5p	21	100	2e-06	42.1
RNAseq_3131	MIMAT0023498	Haemonchus contortus	miR-72	hco-miR-72	23	95.65	4e-05	38.2
RNAseq_3131	MIMAT0021468	Ascaris suum	miR-72-5p	asu-miR-72-5p	23	95.65	4e-05	38.2
RNAseq_3131	MIMAT0014107	Brugia malayi	miR-72	bma-miR-72	23	95.65	4e-05	38.2
RNAseq_3131	MIMAT0000044	Caenorhabditis elegans	miR-72-5p	cel-miR-72-5p	23	95.65	4e-05	38.2
RNAseq_3131	MIMAT0030478	Panagrellus redivivus	miR-72-5p	prd-miR-72-5p	22	95.45	0.0001	36.2
RNAseq_3131	MIMAT0029714	Caenorhabditis brenneri	miR-72a	cbn-miR-72a	22	95.45	0.0001	36.2
RNAseq_3131	MIMAT0014615	Taeniopygia guttata	miR-31	tgu-miR-31	22	95.45	0.0001	36.2
RNAseq_3131	MIMAT0014425	Culex quinquefasciatus	miR-31-5p	cqu-miR-31-5p	22	95.45	0.0001	36.2
RNAseq_3131	MIMAT0014276	Aedes aegypti	miR-31	aae-miR-31	22	95.45	0.0001	36.2
RNAseq_3131	MIMAT0011661	Pristionchus pacificus	miR-72	ppc-miR-72	22	95.45	0.0001	36.2
RNAseq_3131	MIMAT0011567	Caenorhabditis remanei	miR-72-5p	crm-miR-72-5p	22	95.45	0.0001	36.2
RNAseq_3131	MIMAT0009614	Saccoglossus kowalevskii	miR-31	sko-miR-31	22	95.45	0.0001	36.2
RNAseq_3131	MIMAT0008752	Drosophila persimilis	miR-31b	dpe-miR-31b	22	95.45	0.0001	36.2
RNAseq_3131	MIMAT0007111	Ornithorhynchus anatinus	miR-31-5p	oan-miR-31-5p	22	95.45	0.0001	36.2
RNAseq_3131	MIMAT0004094	Monodelphis domestica	miR-31-5p	mdo-miR-31-5p	22	95.45	0.0001	36.2
RNAseq_3131	MIMAT0003679	Xenopus tropicalis	miR-31a	xtr-miR-31a	22	95.45	0.0001	36.2
RNAseq_3131	MIMAT0001221	Drosophila pseudoobscura	miR-31b	dps-miR-31b	22	95.45	0.0001	36.2
RNAseq_3131	MIMAT0001189	Gallus gallus	miR-31-5p	gga-miR-31-5p	22	95.45	0.0001	36.2
RNAseq_3131	MIMAT0021930	Anolis carolinensis	miR-31-5p	aca-miR-31-5p	21	95.24	0.0006	34.2
RNAseq_3131	MIMAT0009657	Strongylocentrotus purpuratus	miR-31	spu-miR-31	21	95.24	0.0006	34.2
RNAseq_3131	MIMAT0009566	Lottia gigantea	miR-31	lgi-miR-31	21	95.24	0.0006	34.2
RNAseq_3131	MIMAT0009515	Capitella teleta	miR-31	cte-miR-31	21	95.24	0.0006	34.2
RNAseq_3131	MIMAT0009104	Drosophila yakuba	miR-31b	dya-miR-31b	21	95.24	0.0006	34.2
RNAseq_3131	MIMAT0009037	Drosophila willistoni	miR-31b	dwi-miR-31b	21	95.24	0.0006	34.2
RNAseq_3131	MIMAT0008972	Drosophila virilis	miR-31b	dvi-miR-31b	21	95.24	0.0006	34.2
RNAseq_3131	MIMAT0008878	Drosophila simulans	miR-31b	dsi-miR-31b	21	95.24	0.0006	34.2
RNAseq_3131	MIMAT0008823	Drosophila sechellia	miR-31b	dse-miR-31b	21	95.24	0.0006	34.2
RNAseq_3131	MIMAT0008639	Drosophila mojavensis	miR-31b	dmo-miR-31b	21	95.24	0.0006	34.2
RNAseq_3131	MIMAT0008612	Drosophila grimshawi	miR-31b	dgr-miR-31b	21	95.24	0.0006	34.2
RNAseq_3131	MIMAT0008481	Drosophila erecta	miR-31b	der-miR-31b	21	95.24	0.0006	34.2
RNAseq_3131	MIMAT0008469	Drosophila ananassae	miR-31b	dan-miR-31b	21	95.24	0.0006	34.2
RNAseq_3131	MIMAT0004213	Bombyx mori	miR-31-5p	bmo-miR-31-5p	21	95.24	0.0006	34.2
RNAseq_3131	MIMAT0000389	Drosophila melanogaster	miR-31b-5p	dme-miR-31b-5p	21	95.24	0.0006	34.2
RNAseq_3131	MIMAT0003980	Schmidtea mediterranea	miR-31b-5p	sme-miR-31b-5p	23	91.3	0.009	30.2
RNAseq_3131	MIMAT0003979	Schmidtea mediterranea	miR-31a-5p	sme-miR-31a-5p	23	91.3	0.009	30.2
RNAseq_3324	MIMAT0009679	Capitella teleta	miR-216b	cte-miR-216b	21	95.24	0.0006	34.2
RNAseq_3538	MIMAT0018420	Nasonia longicornis	miR-12	nlo-miR-12	23	100	2e-07	46.1
RNAseq_3538	MIMAT0015670	Nasonia vitripennis	miR-12	nvi-miR-12	23	100	2e-07	46.1
RNAseq_3538	MIMAT0014395	Culex quinquefasciatus	miR-12-3p	cqu-miR-12-3p	23	100	2e-07	46.1
RNAseq_3538	MIMAT0014253	Aedes aegypti	miR-12-5p	aae-miR-12-5p	23	100	2e-07	46.1
RNAseq_3538	MIMAT0012684	Ixodes scapularis	miR-12	isc-miR-12	23	100	2e-07	46.1
RNAseq_3538	MIMAT0012638	Daphnia pulex	miR-12	dpu-miR-12	23	100	2e-07	46.1
RNAseq_3538	MIMAT0009017	Drosophila willistoni	miR-12	dwi-miR-12	23	100	2e-07	46.1
RNAseq_3538	MIMAT0008911	Drosophila virilis	miR-12	dvi-miR-12	23	100	2e-07	46.1
RNAseq_3538	MIMAT0008852	Drosophila simulans	miR-12	dsi-miR-12	23	100	2e-07	46.1
RNAseq_3538	MIMAT0008766	Drosophila sechellia	miR-12	dse-miR-12	23	100	2e-07	46.1
RNAseq_3538	MIMAT0008762	Drosophila persimilis	miR-12	dpe-miR-12	23	100	2e-07	46.1
RNAseq_3538	MIMAT0008630	Drosophila mojavensis	miR-12	dmo-miR-12	23	100	2e-07	46.1
RNAseq_3538	MIMAT0008560	Drosophila grimshawi	miR-12	dgr-miR-12	23	100	2e-07	46.1
RNAseq_3538	MIMAT0008531	Drosophila erecta	miR-12	der-miR-12	23	100	2e-07	46.1
RNAseq_3538	MIMAT0008418	Drosophila ananassae	miR-12	dan-miR-12	23	100	2e-07	46.1
RNAseq_3538	MIMAT0005527	Anopheles gambiae	miR-12	aga-miR-12	23	100	2e-07	46.1
RNAseq_3538	MIMAT0001472	Apis mellifera	miR-12	ame-miR-12	23	100	2e-07	46.1
RNAseq_3538	MIMAT0001216	Drosophila pseudoobscura	miR-12	dps-miR-12	23	100	2e-07	46.1
RNAseq_3538	MIMAT0000117	Drosophila melanogaster	miR-12-5p	dme-miR-12-5p	23	100	2e-07	46.1
RNAseq_3538	MIMAT0009564	Lottia gigantea	miR-12	lgi-miR-12	21	100	2e-06	42.1
RNAseq_3538	MIMAT0009512	Capitella teleta	miR-12	cte-miR-12	21	100	2e-06	42.1
RNAseq_3538	MIMAT0008358	Tribolium castaneum	miR-12-5p	tca-miR-12-5p	21	100	2e-06	42.1
RNAseq_3538	MIMAT0023102	Tetranychus urticae	miR-12a-5p	tur-miR-12a-5p	20	100	9e-06	40.1
RNAseq_3538	MIMAT0024936	Heliconius melpomene	miR-12	hme-miR-12	23	95.65	4e-05	38.2
RNAseq_3538	MIMAT0024466	Manduca sexta	miR-12	mse-miR-12	23	95.65	4e-05	38.2
RNAseq_3538	MIMAT0009151	Bombyx mori	miR-12	bmo-miR-12	23	95.65	4e-05	38.2
RNAseq_3610	MIMAT0012674	Daphnia pulex	miR-965	dpu-miR-965	22	100	6e-07	44.1
RNAseq_3610	MIMAT0018916	Strigamia maritima	miR-965	smr-miR-965	21	100	2e-06	42.1
RNAseq_3610	MIMAT0024996	Heliconius melpomene	miR-965	hme-miR-965	21	95.24	0.0006	34.2
RNAseq_3610	MIMAT0024428	Manduca sexta	miR-965	mse-miR-965	21	95.24	0.0006	34.2
RNAseq_3610	MIMAT0014744	Acyrthosiphon pisum	miR-965	api-miR-965	21	95.24	0.0006	34.2
RNAseq_3610	MIMAT0012472	Drosophila simulans	miR-965-3p	dsi-miR-965-3p	21	95.24	0.0006	34.2
RNAseq_3610	MIMAT0012250	Drosophila pseudoobscura	miR-965-3p	dps-miR-965-3p	21	95.24	0.0006	34.2
RNAseq_3610	MIMAT0010126	Bombyx mori	miR-965-3p	bmo-miR-965-3p	21	95.24	0.0006	34.2
RNAseq_3610	MIMAT0010095	Tribolium castaneum	miR-965-3p	tca-miR-965-3p	21	95.24	0.0006	34.2
RNAseq_3610	MIMAT0005480	Drosophila melanogaster	miR-965-3p	dme-miR-965-3p	21	95.24	0.0006	34.2
RNAseq_3953	MIMAT0018923	Daphnia pulex	miR-279b	dpu-miR-279b	22	100	6e-07	44.1
RNAseq_4186	MIMAT0023087	Tetranychus urticae	miR-92-3p	tur-miR-92-3p	22	100	6e-07	44.1
RNAseq_4186	MIMAT0009621	Saccoglossus kowalevskii	miR-92c	sko-miR-92c	22	100	6e-07	44.1
RNAseq_4186	MIMAT0030603	Panagrellus redivivus	miR-235-3p	prd-miR-235-3p	21	100	2e-06	42.1
RNAseq_4186	MIMAT0021486	Ascaris suum	miR-92-3p	asu-miR-92-3p	21	100	2e-06	42.1
RNAseq_4186	MIMAT0020118	Xenoturbella bocki	miR-92a	xbo-miR-92a	21	100	2e-06	42.1
RNAseq_4186	MIMAT0009664	Strongylocentrotus purpuratus	miR-92c	spu-miR-92c	21	100	2e-06	42.1
RNAseq_4186	MIMAT0031722	Branchiostoma belcheri	miR-92b-3p	bbe-miR-92b-3p	20	100	9e-06	40.1
RNAseq_4186	MIMAT0029530	Ictalurus punctatus	miR-92b	ipu-miR-92b	20	100	9e-06	40.1
RNAseq_4186	MIMAT0028519	Monodelphis domestica	miR-92b-3p	mdo-miR-92b-3p	20	100	9e-06	40.1
RNAseq_4186	MIMAT0026324	Cyprinus carpio	miR-92b	ccr-miR-92b	20	100	9e-06	40.1
RNAseq_4186	MIMAT0024028	Pan troglodytes	miR-92b	ptr-miR-92b	20	100	9e-06	40.1
RNAseq_4186	MIMAT0024012	Cricetulus griseus	miR-92b-3p	cgr-miR-92b-3p	20	100	9e-06	40.1
RNAseq_4186	MIMAT0019435	Petromyzon marinus	miR-92a	pma-miR-92a	20	100	9e-06	40.1
RNAseq_4186	MIMAT0015744	Pongo pygmaeus	miR-92b	ppy-miR-92b	20	100	9e-06	40.1
RNAseq_4186	MIMAT0014111	Brugia malayi	miR-92	bma-miR-92	20	100	9e-06	40.1
RNAseq_4186	MIMAT0013909	Sus scrofa	miR-92b-3p	ssc-miR-92b-3p	20	100	9e-06	40.1
RNAseq_4186	MIMAT0012966	Equus caballus	miR-92b	eca-miR-92b	20	100	9e-06	40.1
RNAseq_4186	MIMAT0012672	Daphnia pulex	miR-92	dpu-miR-92	20	100	9e-06	40.1
RNAseq_4186	MIMAT0009479	Branchiostoma floridae	miR-92b-3p	bfl-miR-92b-3p	20	100	9e-06	40.1
RNAseq_4186	MIMAT0009384	Bos taurus	miR-92b	bta-miR-92b	20	100	9e-06	40.1
RNAseq_4186	MIMAT0006703	Canis familiaris	miR-92b	cfa-miR-92b	20	100	9e-06	40.1
RNAseq_4186	MIMAT0006177	Macaca mulatta	miR-92b-3p	mml-miR-92b-3p	20	100	9e-06	40.1
RNAseq_4186	MIMAT0006080	Oikopleura dioica	miR-92a	odi-miR-92a	20	100	9e-06	40.1
RNAseq_4186	MIMAT0005340	Rattus norvegicus	miR-92b-3p	rno-miR-92b-3p	20	100	9e-06	40.1
RNAseq_4186	MIMAT0004899	Mus musculus	miR-92b-3p	mmu-miR-92b-3p	20	100	9e-06	40.1
RNAseq_4186	MIMAT0003658	Xenopus tropicalis	miR-92b	xtr-miR-92b	20	100	9e-06	40.1
RNAseq_4186	MIMAT0003218	Homo sapiens	miR-92b-3p	hsa-miR-92b-3p	20	100	9e-06	40.1
RNAseq_4186	MIMAT0001809	Danio rerio	miR-92b	dre-miR-92b	20	100	9e-06	40.1
RNAseq_4186	MIMAT0029529	Ictalurus punctatus	miR-92a	ipu-miR-92a	22	95.45	0.0001	36.2
RNAseq_4186	MIMAT0026323	Cyprinus carpio	miR-92a	ccr-miR-92a	22	95.45	0.0001	36.2
RNAseq_4186	MIMAT0024010	Cricetulus griseus	miR-92a-3p	cgr-miR-92a-3p	22	95.45	0.0001	36.2
RNAseq_4186	MIMAT0021993	Anolis carolinensis	miR-92a	aca-miR-92a	22	95.45	0.0001	36.2
RNAseq_4186	MIMAT0014574	Taeniopygia guttata	miR-92-3p	tgu-miR-92-3p	22	95.45	0.0001	36.2
RNAseq_4186	MIMAT0013908	Sus scrofa	miR-92a	ssc-miR-92a	22	95.45	0.0001	36.2
RNAseq_4186	MIMAT0013089	Equus caballus	miR-92a	eca-miR-92a	22	95.45	0.0001	36.2
RNAseq_4186	MIMAT0006653	Canis familiaris	miR-92a	cfa-miR-92a	22	95.45	0.0001	36.2
RNAseq_4186	MIMAT0006858	Ornithorhynchus anatinus	miR-92a-3p	oan-miR-92a-3p	22	95.45	0.0001	36.2
RNAseq_4186	MIMAT0004171	Monodelphis domestica	miR-92a-3p	mdo-miR-92a-3p	22	95.45	0.0001	36.2
RNAseq_4186	MIMAT0009383	Bos taurus	miR-92a	bta-miR-92a	22	95.45	0.0001	36.2
RNAseq_4186	MIMAT0002925	Tetraodon nigroviridis	miR-92	tni-miR-92	22	95.45	0.0001	36.2
RNAseq_4186	MIMAT0002924	Fugu rubripes	miR-92	fru-miR-92	22	95.45	0.0001	36.2
RNAseq_4186	MIMAT0002803	Macaca nemestrina	miR-92	mne-miR-92	22	95.45	0.0001	36.2
RNAseq_4186	MIMAT0002720	Lagothrix lagotricha	miR-92	lla-miR-92	22	95.45	0.0001	36.2
RNAseq_4186	MIMAT0002713	Saguinus labiatus	miR-92	sla-miR-92	22	95.45	0.0001	36.2
RNAseq_4186	MIMAT0002706	Macaca mulatta	miR-92a-3p	mml-miR-92a-3p	22	95.45	0.0001	36.2
RNAseq_4186	MIMAT0002699	Pan troglodytes	miR-92	ptr-miR-92	22	95.45	0.0001	36.2
RNAseq_4186	MIMAT0002692	Pongo pygmaeus	miR-92	ppy-miR-92	22	95.45	0.0001	36.2
RNAseq_4186	MIMAT0002685	Pan paniscus	miR-92	ppa-miR-92	22	95.45	0.0001	36.2
RNAseq_4186	MIMAT0002678	Ateles geoffroyi	miR-92	age-miR-92	22	95.45	0.0001	36.2
RNAseq_4186	MIMAT0002671	Lemur catta	miR-92	lca-miR-92	22	95.45	0.0001	36.2
RNAseq_4186	MIMAT0002664	Gorilla gorilla	miR-92	ggo-miR-92	22	95.45	0.0001	36.2
RNAseq_4186	MIMAT0001808	Danio rerio	miR-92a	dre-miR-92a	22	95.45	0.0001	36.2
RNAseq_4186	MIMAT0000092	Homo sapiens	miR-92a-3p	hsa-miR-92a-3p	22	95.45	0.0001	36.2
RNAseq_4186	MIMAT0029757	Caenorhabditis brenneri	miR-235	cbn-miR-235	21	95.24	0.0006	34.2
RNAseq_4186	MIMAT0023388	Haemonchus contortus	miR-235	hco-miR-235	21	95.24	0.0006	34.2
RNAseq_4186	MIMAT0022534	Oryzias latipes	miR-92a	ola-miR-92a	21	95.24	0.0006	34.2
RNAseq_4186	MIMAT0011558	Caenorhabditis remanei	miR-235-3p	crm-miR-235-3p	21	95.24	0.0006	34.2
RNAseq_4186	MIMAT0009663	Strongylocentrotus purpuratus	miR-92b-3p	spu-miR-92b-3p	21	95.24	0.0006	34.2
RNAseq_4186	MIMAT0009620	Saccoglossus kowalevskii	miR-92b	sko-miR-92b	21	95.24	0.0006	34.2
RNAseq_4186	MIMAT0011149	Xenopus laevis	miR-92a	xla-miR-92a	21	95.24	0.0006	34.2
RNAseq_4186	MIMAT0003580	Xenopus tropicalis	miR-92a	xtr-miR-92a	21	95.24	0.0006	34.2
RNAseq_4186	MIMAT0001109	Gallus gallus	miR-92-3p	gga-miR-92-3p	21	95.24	0.0006	34.2
RNAseq_4186	MIMAT0000816	Rattus norvegicus	miR-92a-3p	rno-miR-92a-3p	21	95.24	0.0006	34.2
RNAseq_4186	MIMAT0000539	Mus musculus	miR-92a-3p	mmu-miR-92a-3p	21	95.24	0.0006	34.2
RNAseq_4186	MIMAT0024120	Gorilla gorilla	miR-92b	ggo-miR-92b	20	95	0.002	32.2
RNAseq_4186	MIMAT0014322	Aedes aegypti	miR-92b-3p	aae-miR-92b-3p	20	95	0.002	32.2
RNAseq_4186	MIMAT0010117	Apis mellifera	miR-92b	ame-miR-92b	20	95	0.002	32.2
RNAseq_4186	MIMAT0009574	Lottia gigantea	miR-92	lgi-miR-92	20	95	0.002	32.2
RNAseq_4186	MIMAT0009522	Capitella teleta	miR-92c	cte-miR-92c	20	95	0.002	32.2
RNAseq_4186	MIMAT0009120	Drosophila yakuba	miR-92b	dya-miR-92b	20	95	0.002	32.2
RNAseq_4186	MIMAT0008991	Drosophila willistoni	miR-92b	dwi-miR-92b	20	95	0.002	32.2
RNAseq_4186	MIMAT0008962	Drosophila virilis	miR-92b	dvi-miR-92b	20	95	0.002	32.2
RNAseq_4186	MIMAT0008879	Drosophila simulans	miR-92b	dsi-miR-92b	20	95	0.002	32.2
RNAseq_4186	MIMAT0008774	Drosophila sechellia	miR-92b	dse-miR-92b	20	95	0.002	32.2
RNAseq_4186	MIMAT0008756	Drosophila persimilis	miR-92b	dpe-miR-92b	20	95	0.002	32.2
RNAseq_4186	MIMAT0008658	Drosophila mojavensis	miR-92b	dmo-miR-92b	20	95	0.002	32.2
RNAseq_4186	MIMAT0008624	Drosophila grimshawi	miR-92b	dgr-miR-92b	20	95	0.002	32.2
RNAseq_4186	MIMAT0008543	Drosophila erecta	miR-92b	der-miR-92b	20	95	0.002	32.2
RNAseq_4186	MIMAT0008405	Drosophila ananassae	miR-92b	dan-miR-92b	20	95	0.002	32.2
RNAseq_4186	MIMAT0008368	Tribolium castaneum	miR-92b-3p	tca-miR-92b-3p	20	95	0.002	32.2
RNAseq_4186	MIMAT0001528	Anopheles gambiae	miR-92b	aga-miR-92b	20	95	0.002	32.2
RNAseq_4186	MIMAT0001227	Drosophila pseudoobscura	miR-92b	dps-miR-92b	20	95	0.002	32.2
RNAseq_4186	MIMAT0000358	Drosophila melanogaster	miR-92b-3p	dme-miR-92b-3p	20	95	0.002	32.2
RNAseq_4195	MIMAT0012647	Daphnia pulex	miR-252a	dpu-miR-252a	21	100	2e-06	42.1
RNAseq_4195	MIMAT0024948	Heliconius melpomene	miR-252	hme-miR-252	21	95.24	0.0006	34.2
RNAseq_4195	MIMAT0024465	Manduca sexta	miR-252	mse-miR-252	21	95.24	0.0006	34.2
RNAseq_4195	MIMAT0018428	Nasonia longicornis	miR-252	nlo-miR-252	21	95.24	0.0006	34.2
RNAseq_4195	MIMAT0015701	Nasonia vitripennis	miR-252	nvi-miR-252	21	95.24	0.0006	34.2
RNAseq_4195	MIMAT0014373	Culex quinquefasciatus	miR-252-5p	cqu-miR-252-5p	21	95.24	0.0006	34.2
RNAseq_4195	MIMAT0014216	Aedes aegypti	miR-252-5p	aae-miR-252-5p	21	95.24	0.0006	34.2
RNAseq_4195	MIMAT0012465	Drosophila simulans	miR-252-5p	dsi-miR-252-5p	21	95.24	0.0006	34.2
RNAseq_4195	MIMAT0012261	Drosophila pseudoobscura	miR-252-5p	dps-miR-252-5p	21	95.24	0.0006	34.2
RNAseq_4195	MIMAT0010124	Bombyx mori	miR-252-5p	bmo-miR-252-5p	21	95.24	0.0006	34.2
RNAseq_4195	MIMAT0010113	Apis mellifera	miR-252a	ame-miR-252a	21	95.24	0.0006	34.2
RNAseq_4195	MIMAT0009638	Saccoglossus kowalevskii	miR-252a	sko-miR-252a	21	95.24	0.0006	34.2
RNAseq_4195	MIMAT0009536	Capitella teleta	miR-252a	cte-miR-252a	21	95.24	0.0006	34.2
RNAseq_4195	MIMAT0005516	Drosophila melanogaster	miR-252-5p	dme-miR-252-5p	21	95.24	0.0006	34.2
RNAseq_4195	MIMAT0018410	Nasonia giraulti	miR-252	ngi-miR-252	20	95	0.002	32.2
RNAseq_4506	MIMAT0018967	Homo sapiens	miR-4448	hsa-miR-4448	20	95	0.002	32.2
RNAseq_4547	MIMAT0024420	Manduca sexta	miR-210	mse-miR-210	21	100	2e-06	42.1
RNAseq_4547	MIMAT0010143	Locusta migratoria	miR-210-3p	lmi-miR-210-3p	21	100	2e-06	42.1
RNAseq_4547	MIMAT0000355	Drosophila melanogaster	miR-210-3p	dme-miR-210-3p	21	100	2e-06	42.1
RNAseq_4547	MIMAT0021868	Anolis carolinensis	miR-210-3p	aca-miR-210-3p	20	100	9e-06	40.1
RNAseq_4547	MIMAT0018399	Nasonia giraulti	miR-210	ngi-miR-210	20	100	9e-06	40.1
RNAseq_4547	MIMAT0015695	Nasonia vitripennis	miR-210	nvi-miR-210	20	100	9e-06	40.1
RNAseq_4547	MIMAT0009095	Drosophila yakuba	miR-210	dya-miR-210	20	100	9e-06	40.1
RNAseq_4547	MIMAT0009020	Drosophila willistoni	miR-210	dwi-miR-210	20	100	9e-06	40.1
RNAseq_4547	MIMAT0008928	Drosophila virilis	miR-210	dvi-miR-210	20	100	9e-06	40.1
RNAseq_4547	MIMAT0008849	Drosophila simulans	miR-210	dsi-miR-210	20	100	9e-06	40.1
RNAseq_4547	MIMAT0008776	Drosophila sechellia	miR-210	dse-miR-210	20	100	9e-06	40.1
RNAseq_4547	MIMAT0008704	Drosophila persimilis	miR-210	dpe-miR-210	20	100	9e-06	40.1
RNAseq_4547	MIMAT0008667	Drosophila mojavensis	miR-210	dmo-miR-210	20	100	9e-06	40.1
RNAseq_4547	MIMAT0008613	Drosophila grimshawi	miR-210	dgr-miR-210	20	100	9e-06	40.1
RNAseq_4547	MIMAT0008546	Drosophila erecta	miR-210	der-miR-210	20	100	9e-06	40.1
RNAseq_4547	MIMAT0008433	Drosophila ananassae	miR-210	dan-miR-210	20	100	9e-06	40.1
RNAseq_4547	MIMAT0008376	Tribolium castaneum	miR-210-3p	tca-miR-210-3p	20	100	9e-06	40.1
RNAseq_4547	MIMAT0003624	Xenopus tropicalis	miR-210	xtr-miR-210	20	100	9e-06	40.1
RNAseq_4547	MIMAT0003096	Tetraodon nigroviridis	miR-210	tni-miR-210	20	100	9e-06	40.1
RNAseq_4547	MIMAT0003095	Fugu rubripes	miR-210	fru-miR-210	20	100	9e-06	40.1
RNAseq_4547	MIMAT0001477	Apis mellifera	miR-210	ame-miR-210	20	100	9e-06	40.1
RNAseq_4547	MIMAT0001281	Danio rerio	miR-210-3p	dre-miR-210-3p	20	100	9e-06	40.1
RNAseq_4547	MIMAT0001233	Drosophila pseudoobscura	miR-210a	dps-miR-210a	20	100	9e-06	40.1
RNAseq_4547	MIMAT0014397	Culex quinquefasciatus	miR-210-3p	cqu-miR-210-3p	21	95.24	0.0006	34.2
RNAseq_4547	MIMAT0014716	Acyrthosiphon pisum	miR-210	api-miR-210	20	95	0.002	32.2
RNAseq_4547	MIMAT0001505	Anopheles gambiae	miR-210	aga-miR-210	20	95	0.002	32.2
RNAseq_4830	MIMAT0031581	Branchiostoma belcheri	miR-125b-3p	bbe-miR-125b-3p	21	100	2e-06	42.1
RNAseq_4830	MIMAT0031579	Branchiostoma belcheri	miR-125a-5p	bbe-miR-125a-5p	21	100	2e-06	42.1
RNAseq_4830	MIMAT0029398	Ictalurus punctatus	miR-125b	ipu-miR-125b	21	100	2e-06	42.1
RNAseq_4830	MIMAT0026204	Cyprinus carpio	miR-125b	ccr-miR-125b	21	100	2e-06	42.1
RNAseq_4830	MIMAT0023743	Cricetulus griseus	miR-125b-5p	cgr-miR-125b-5p	21	100	2e-06	42.1
RNAseq_4830	MIMAT0022802	Sarcophilus harrisii	miR-125a	sha-miR-125a	21	100	2e-06	42.1
RNAseq_4830	MIMAT0022627	Oryzias latipes	miR-125b	ola-miR-125b	21	100	2e-06	42.1
RNAseq_4830	MIMAT0022615	Oryzias latipes	miR-125c	ola-miR-125c	21	100	2e-06	42.1
RNAseq_4830	MIMAT0021729	Anolis carolinensis	miR-125b	aca-miR-125b	21	100	2e-06	42.1
RNAseq_4830	MIMAT0019446	Petromyzon marinus	miR-125-5p	pma-miR-125-5p	21	100	2e-06	42.1
RNAseq_4830	MIMAT0018421	Nasonia longicornis	miR-125	nlo-miR-125	21	100	2e-06	42.1
RNAseq_4830	MIMAT0017887	Rattus norvegicus	miR-3588	rno-miR-3588	21	100	2e-06	42.1
RNAseq_4830	MIMAT0015679	Nasonia vitripennis	miR-125	nvi-miR-125	21	100	2e-06	42.1
RNAseq_4830	MIMAT0014971	Ovis aries	miR-125b	oar-miR-125b	21	100	2e-06	42.1
RNAseq_4830	MIMAT0014505	Taeniopygia guttata	miR-125-5p	tgu-miR-125-5p	21	100	2e-06	42.1
RNAseq_4830	MIMAT0014355	Culex quinquefasciatus	miR-125-5p	cqu-miR-125-5p	21	100	2e-06	42.1
RNAseq_4830	MIMAT0014258	Aedes aegypti	miR-125-5p	aae-miR-125-5p	21	100	2e-06	42.1
RNAseq_4830	MIMAT0012981	Equus caballus	miR-125b-5p	eca-miR-125b-5p	21	100	2e-06	42.1
RNAseq_4830	MIMAT0010007	Branchiostoma floridae	miR-125b	bfl-miR-125b	21	100	2e-06	42.1
RNAseq_4830	MIMAT0009667	Strongylocentrotus purpuratus	miR-125-5p	spu-miR-125-5p	21	100	2e-06	42.1
RNAseq_4830	MIMAT0009626	Saccoglossus kowalevskii	miR-125a	sko-miR-125a	21	100	2e-06	42.1
RNAseq_4830	MIMAT0009525	Capitella teleta	miR-125	cte-miR-125	21	100	2e-06	42.1
RNAseq_4830	MIMAT0009483	Branchiostoma floridae	miR-125a-5p	bfl-miR-125a-5p	21	100	2e-06	42.1
RNAseq_4830	MIMAT0009096	Drosophila yakuba	miR-125	dya-miR-125	21	100	2e-06	42.1
RNAseq_4830	MIMAT0009032	Drosophila willistoni	miR-125	dwi-miR-125	21	100	2e-06	42.1
RNAseq_4830	MIMAT0008917	Drosophila virilis	miR-125	dvi-miR-125	21	100	2e-06	42.1
RNAseq_4830	MIMAT0008846	Drosophila simulans	miR-125	dsi-miR-125	21	100	2e-06	42.1
RNAseq_4830	MIMAT0008826	Drosophila sechellia	miR-125	dse-miR-125	21	100	2e-06	42.1
RNAseq_4830	MIMAT0008725	Drosophila persimilis	miR-125	dpe-miR-125	21	100	2e-06	42.1
RNAseq_4830	MIMAT0008669	Drosophila mojavensis	miR-125	dmo-miR-125	21	100	2e-06	42.1
RNAseq_4830	MIMAT0008610	Drosophila grimshawi	miR-125	dgr-miR-125	21	100	2e-06	42.1
RNAseq_4830	MIMAT0008526	Drosophila erecta	miR-125	der-miR-125	21	100	2e-06	42.1
RNAseq_4830	MIMAT0008473	Drosophila ananassae	miR-125	dan-miR-125	21	100	2e-06	42.1
RNAseq_4830	MIMAT0008371	Tribolium castaneum	miR-125-5p	tca-miR-125-5p	21	100	2e-06	42.1
RNAseq_4830	MIMAT0006670	Canis familiaris	miR-125b	cfa-miR-125b	21	100	2e-06	42.1
RNAseq_4830	MIMAT0007048	Ornithorhynchus anatinus	miR-125-5p	oan-miR-125-5p	21	100	2e-06	42.1
RNAseq_4830	MIMAT0004103	Monodelphis domestica	miR-125b-5p	mdo-miR-125b-5p	21	100	2e-06	42.1
RNAseq_4830	MIMAT0003586	Xenopus tropicalis	miR-125b	xtr-miR-125b	21	100	2e-06	42.1
RNAseq_4830	MIMAT0003539	Bos taurus	miR-125b	bta-miR-125b	21	100	2e-06	42.1
RNAseq_4830	MIMAT0003062	Tetraodon nigroviridis	miR-125b	tni-miR-125b	21	100	2e-06	42.1
RNAseq_4830	MIMAT0003061	Fugu rubripes	miR-125b	fru-miR-125b	21	100	2e-06	42.1
RNAseq_4830	MIMAT0002280	Lemur catta	miR-125b	lca-miR-125b	21	100	2e-06	42.1
RNAseq_4830	MIMAT0002228	Macaca nemestrina	miR-125b	mne-miR-125b	21	100	2e-06	42.1
RNAseq_4830	MIMAT0002227	Lagothrix lagotricha	miR-125b	lla-miR-125b	21	100	2e-06	42.1
RNAseq_4830	MIMAT0002226	Saguinus labiatus	miR-125b	sla-miR-125b	21	100	2e-06	42.1
RNAseq_4830	MIMAT0002225	Macaca mulatta	miR-125b-5p	mml-miR-125b-5p	21	100	2e-06	42.1
RNAseq_4830	MIMAT0002224	Pan troglodytes	miR-125b	ptr-miR-125b	21	100	2e-06	42.1
RNAseq_4830	MIMAT0002223	Pongo pygmaeus	miR-125b	ppy-miR-125b	21	100	2e-06	42.1
RNAseq_4830	MIMAT0002222	Pan paniscus	miR-125b	ppa-miR-125b	21	100	2e-06	42.1
RNAseq_4830	MIMAT0002221	Ateles geoffroyi	miR-125b	age-miR-125b	21	100	2e-06	42.1
RNAseq_4830	MIMAT0002220	Gorilla gorilla	miR-125b	ggo-miR-125b	21	100	2e-06	42.1
RNAseq_4830	MIMAT0002120	Sus scrofa	miR-125b	ssc-miR-125b	21	100	2e-06	42.1
RNAseq_4830	MIMAT0001821	Danio rerio	miR-125b	dre-miR-125b	21	100	2e-06	42.1
RNAseq_4830	MIMAT0001500	Anopheles gambiae	miR-125	aga-miR-125	21	100	2e-06	42.1
RNAseq_4830	MIMAT0001230	Drosophila pseudoobscura	miR-125	dps-miR-125	21	100	2e-06	42.1
RNAseq_4830	MIMAT0001105	Gallus gallus	miR-125b-5p	gga-miR-125b-5p	21	100	2e-06	42.1
RNAseq_4830	MIMAT0000830	Rattus norvegicus	miR-125b-5p	rno-miR-125b-5p	21	100	2e-06	42.1
RNAseq_4830	MIMAT0000423	Homo sapiens	miR-125b-5p	hsa-miR-125b-5p	21	100	2e-06	42.1
RNAseq_4830	MIMAT0000397	Drosophila melanogaster	miR-125-5p	dme-miR-125-5p	21	100	2e-06	42.1
RNAseq_4830	MIMAT0000136	Mus musculus	miR-125b-5p	mmu-miR-125b-5p	21	100	2e-06	42.1
RNAseq_4830	MIMAT0001474	Apis mellifera	miR-125	ame-miR-125	20	100	9e-06	40.1
RNAseq_5022	MIMAT0012656	Daphnia pulex	miR-285	dpu-miR-285	22	100	6e-07	44.1
RNAseq_5670	MIMAT0024944	Heliconius melpomene	miR-190	hme-miR-190	21	100	2e-06	42.1
RNAseq_5670	MIMAT0024424	Manduca sexta	miR-190	mse-miR-190	21	100	2e-06	42.1
RNAseq_5670	MIMAT0023084	Tetranychus urticae	miR-190-5p	tur-miR-190-5p	21	100	2e-06	42.1
RNAseq_5670	MIMAT0015673	Nasonia vitripennis	miR-190	nvi-miR-190	21	100	2e-06	42.1
RNAseq_5670	MIMAT0014402	Culex quinquefasciatus	miR-190	cqu-miR-190	21	100	2e-06	42.1
RNAseq_5670	MIMAT0014243	Aedes aegypti	miR-190	aae-miR-190	21	100	2e-06	42.1
RNAseq_5670	MIMAT0014127	Acyrthosiphon pisum	miR-190	api-miR-190	21	100	2e-06	42.1
RNAseq_5670	MIMAT0012449	Drosophila simulans	miR-190-5p	dsi-miR-190-5p	21	100	2e-06	42.1
RNAseq_5670	MIMAT0012227	Drosophila pseudoobscura	miR-190-5p	dps-miR-190-5p	21	100	2e-06	42.1
RNAseq_5670	MIMAT0010100	Anopheles gambiae	miR-190	aga-miR-190	21	100	2e-06	42.1
RNAseq_5670	MIMAT0009153	Bombyx mori	miR-190-5p	bmo-miR-190-5p	21	100	2e-06	42.1
RNAseq_5670	MIMAT0008375	Tribolium castaneum	miR-190-5p	tca-miR-190-5p	21	100	2e-06	42.1
RNAseq_5670	MIMAT0005467	Drosophila melanogaster	miR-190-5p	dme-miR-190-5p	21	100	2e-06	42.1
RNAseq_5670	MIMAT0004440	Apis mellifera	miR-190	ame-miR-190	21	100	2e-06	42.1
RNAseq_5670	MIMAT0009586	Lottia gigantea	miR-190	lgi-miR-190	21	95.24	0.0006	34.2
RNAseq_5670	MIMAT0014104	Brugia malayi	miR-50	bma-miR-50	20	95	0.002	32.2
RNAseq_5670	MIMAT0000475	Caenorhabditis briggsae	miR-50	cbr-miR-50	20	95	0.002	32.2
RNAseq_5843	MIMAT0024999	Heliconius melpomene	miR-981	hme-miR-981	22	100	6e-07	44.1
RNAseq_5843	MIMAT0024433	Manduca sexta	miR-981	mse-miR-981	22	100	6e-07	44.1
RNAseq_5843	MIMAT0014386	Culex quinquefasciatus	miR-981	cqu-miR-981	22	100	6e-07	44.1
RNAseq_5843	MIMAT0014267	Aedes aegypti	miR-981	aae-miR-981	22	100	6e-07	44.1
RNAseq_5843	MIMAT0012675	Daphnia pulex	miR-981	dpu-miR-981	22	100	6e-07	44.1
RNAseq_5843	MIMAT0012220	Drosophila pseudoobscura	miR-981-3p	dps-miR-981-3p	22	100	6e-07	44.1
RNAseq_5843	MIMAT0010098	Tribolium castaneum	miR-981	tca-miR-981	22	100	6e-07	44.1
RNAseq_5843	MIMAT0005497	Drosophila melanogaster	miR-981-3p	dme-miR-981-3p	22	100	6e-07	44.1
RNAseq_5843	MIMAT0012486	Drosophila simulans	miR-981-3p	dsi-miR-981-3p	21	100	2e-06	42.1
RNAseq_5843	MIMAT0009601	Lottia gigantea	miR-981	lgi-miR-981	21	100	2e-06	42.1
RNAseq_5843	MIMAT0007857	Anopheles gambiae	miR-981	aga-miR-981	20	100	9e-06	40.1
RNAseq_5843	MIMAT0010121	Apis mellifera	miR-981	ame-miR-981	22	95.45	0.0001	36.2
RNAseq_5843	MIMAT0020068	Strongylocentrotus purpuratus	miR-981	spu-miR-981	21	95.24	0.0006	34.2
RNAseq_6451	MIMAT0022791	Sarcophilus harrisii	miR-716b	sha-miR-716b	20	100	9e-06	40.1
RNAseq_6995	MIMAT0012646	Daphnia pulex	miR-745	dpu-miR-745	22	100	6e-07	44.1
RNAseq_6995	MIMAT0009546	Capitella teleta	miR-745b	cte-miR-745b	20	95	0.002	32.2
RNAseq_7193	MIMAT0030474	Panagrellus redivivus	let-7-5p	prd-let-7-5p	23	95.65	4e-05	38.2
RNAseq_7894	MIMAT0031578	Branchiostoma belcheri	miR-124-3p	bbe-miR-124-3p	21	100	2e-06	42.1
RNAseq_7894	MIMAT0030787	Panagrellus redivivus	miR-124-3p	prd-miR-124-3p	21	100	2e-06	42.1
RNAseq_7894	MIMAT0029752	Caenorhabditis brenneri	miR-124	cbn-miR-124	21	100	2e-06	42.1
RNAseq_7894	MIMAT0025431	Paralichthys olivaceus	miR-124-3p	pol-miR-124-3p	21	100	2e-06	42.1
RNAseq_7894	MIMAT0024937	Heliconius melpomene	miR-124	hme-miR-124	21	100	2e-06	42.1
RNAseq_7894	MIMAT0024474	Manduca sexta	miR-124	mse-miR-124	21	100	2e-06	42.1
RNAseq_7894	MIMAT0023740	Cricetulus griseus	miR-124	cgr-miR-124	21	100	2e-06	42.1
RNAseq_7894	MIMAT0023338	Haemonchus contortus	miR-124	hco-miR-124	21	100	2e-06	42.1
RNAseq_7894	MIMAT0022573	Oryzias latipes	miR-124-3p	ola-miR-124-3p	21	100	2e-06	42.1
RNAseq_7894	MIMAT0023089	Tetranychus urticae	miR-124-3p	tur-miR-124-3p	21	100	2e-06	42.1
RNAseq_7894	MIMAT0021725	Anolis carolinensis	miR-124a	aca-miR-124a	21	100	2e-06	42.1
RNAseq_7894	MIMAT0021496	Ascaris suum	miR-124-3p	asu-miR-124-3p	21	100	2e-06	42.1
RNAseq_7894	MIMAT0020266	Echinococcus multilocularis	miR-124a	emu-miR-124a	21	100	2e-06	42.1
RNAseq_7894	MIMAT0020240	Echinococcus granulosus	miR-124a	egr-miR-124a	21	100	2e-06	42.1
RNAseq_7894	MIMAT0020120	Xenoturbella bocki	miR-124	xbo-miR-124	21	100	2e-06	42.1
RNAseq_7894	MIMAT0019445	Petromyzon marinus	miR-124-3p	pma-miR-124-3p	21	100	2e-06	42.1
RNAseq_7894	MIMAT0015688	Nasonia vitripennis	miR-124	nvi-miR-124	21	100	2e-06	42.1
RNAseq_7894	MIMAT0014712	Acyrthosiphon pisum	miR-124	api-miR-124	21	100	2e-06	42.1
RNAseq_7894	MIMAT0014507	Taeniopygia guttata	miR-124-3p	tgu-miR-124-3p	21	100	2e-06	42.1
RNAseq_7894	MIMAT0014116	Brugia malayi	miR-124	bma-miR-124	21	100	2e-06	42.1
RNAseq_7894	MIMAT0012685	Ixodes scapularis	miR-124	isc-miR-124	21	100	2e-06	42.1
RNAseq_7894	MIMAT0012639	Daphnia pulex	miR-124	dpu-miR-124	21	100	2e-06	42.1
RNAseq_7894	MIMAT0009666	Strongylocentrotus purpuratus	miR-124	spu-miR-124	21	100	2e-06	42.1
RNAseq_7894	MIMAT0009625	Saccoglossus kowalevskii	miR-124-3p	sko-miR-124-3p	21	100	2e-06	42.1
RNAseq_7894	MIMAT0009578	Lottia gigantea	miR-124	lgi-miR-124	21	100	2e-06	42.1
RNAseq_7894	MIMAT0009555	Capitella teleta	miR-124	cte-miR-124	21	100	2e-06	42.1
RNAseq_7894	MIMAT0009482	Branchiostoma floridae	miR-124-3p	bfl-miR-124-3p	21	100	2e-06	42.1
RNAseq_7894	MIMAT0013774	Bos taurus	miR-124b	bta-miR-124b	21	100	2e-06	42.1
RNAseq_7894	MIMAT0009105	Drosophila yakuba	miR-124	dya-miR-124	21	100	2e-06	42.1
RNAseq_7894	MIMAT0009027	Drosophila willistoni	miR-124	dwi-miR-124	21	100	2e-06	42.1
RNAseq_7894	MIMAT0008939	Drosophila virilis	miR-124	dvi-miR-124	21	100	2e-06	42.1
RNAseq_7894	MIMAT0008847	Drosophila simulans	miR-124	dsi-miR-124	21	100	2e-06	42.1
RNAseq_7894	MIMAT0008839	Drosophila sechellia	miR-124	dse-miR-124	21	100	2e-06	42.1
RNAseq_7894	MIMAT0008731	Drosophila persimilis	miR-124	dpe-miR-124	21	100	2e-06	42.1
RNAseq_7894	MIMAT0008688	Drosophila mojavensis	miR-124	dmo-miR-124	21	100	2e-06	42.1
RNAseq_7894	MIMAT0008615	Drosophila grimshawi	miR-124	dgr-miR-124	21	100	2e-06	42.1
RNAseq_7894	MIMAT0008547	Drosophila erecta	miR-124	der-miR-124	21	100	2e-06	42.1
RNAseq_7894	MIMAT0008431	Drosophila ananassae	miR-124	dan-miR-124	21	100	2e-06	42.1
RNAseq_7894	MIMAT0008370	Tribolium castaneum	miR-124-3p	tca-miR-124-3p	21	100	2e-06	42.1
RNAseq_7894	MIMAT0006657	Canis familiaris	miR-124	cfa-miR-124	21	100	2e-06	42.1
RNAseq_7894	MIMAT0006126	Ciona savignyi	miR-124	csa-miR-124	21	100	2e-06	42.1
RNAseq_7894	MIMAT0006100	Ciona intestinalis	miR-124-3p	cin-miR-124-3p	21	100	2e-06	42.1
RNAseq_7894	MIMAT0007114	Ornithorhynchus anatinus	miR-124a-1-3p	oan-miR-124a-1-3p	21	100	2e-06	42.1
RNAseq_7894	MIMAT0004102	Monodelphis domestica	miR-124a-3p	mdo-miR-124a-3p	21	100	2e-06	42.1
RNAseq_7894	MIMAT0003995	Schmidtea mediterranea	miR-124c-3p	sme-miR-124c-3p	21	100	2e-06	42.1
RNAseq_7894	MIMAT0003811	Bos taurus	miR-124a	bta-miR-124a	21	100	2e-06	42.1
RNAseq_7894	MIMAT0004198	Bombyx mori	miR-124	bmo-miR-124	21	100	2e-06	42.1
RNAseq_7894	MIMAT0003683	Xenopus tropicalis	miR-124	xtr-miR-124	21	100	2e-06	42.1
RNAseq_7894	MIMAT0002897	Tetraodon nigroviridis	miR-124	tni-miR-124	21	100	2e-06	42.1
RNAseq_7894	MIMAT0002896	Fugu rubripes	miR-124	fru-miR-124	21	100	2e-06	42.1
RNAseq_7894	MIMAT0002471	Lagothrix lagotricha	miR-124a	lla-miR-124a	21	100	2e-06	42.1
RNAseq_7894	MIMAT0002470	Macaca mulatta	miR-124a-3p	mml-miR-124a-3p	21	100	2e-06	42.1
RNAseq_7894	MIMAT0002469	Pan troglodytes	miR-124a	ptr-miR-124a	21	100	2e-06	42.1
RNAseq_7894	MIMAT0002468	Pongo pygmaeus	miR-124a	ppy-miR-124a	21	100	2e-06	42.1
RNAseq_7894	MIMAT0002467	Pan paniscus	miR-124a	ppa-miR-124a	21	100	2e-06	42.1
RNAseq_7894	MIMAT0002466	Ateles geoffroyi	miR-124a	age-miR-124a	21	100	2e-06	42.1
RNAseq_7894	MIMAT0002465	Gorilla gorilla	miR-124a	ggo-miR-124a	21	100	2e-06	42.1
RNAseq_7894	MIMAT0002156	Sus scrofa	miR-124a	ssc-miR-124a	21	100	2e-06	42.1
RNAseq_7894	MIMAT0001819	Danio rerio	miR-124	dre-miR-124	21	100	2e-06	42.1
RNAseq_7894	MIMAT0001499	Anopheles gambiae	miR-124	aga-miR-124	21	100	2e-06	42.1
RNAseq_7894	MIMAT0001473	Apis mellifera	miR-124	ame-miR-124	21	100	2e-06	42.1
RNAseq_7894	MIMAT0001229	Drosophila pseudoobscura	miR-124	dps-miR-124	21	100	2e-06	42.1
RNAseq_7894	MIMAT0001128	Gallus gallus	miR-124a-3p	gga-miR-124a-3p	21	100	2e-06	42.1
RNAseq_7894	MIMAT0000494	Caenorhabditis briggsae	miR-124	cbr-miR-124	21	100	2e-06	42.1
RNAseq_7894	MIMAT0000351	Drosophila melanogaster	miR-124-3p	dme-miR-124-3p	21	100	2e-06	42.1
RNAseq_7894	MIMAT0000282	Caenorhabditis elegans	miR-124-3p	cel-miR-124-3p	21	100	2e-06	42.1
RNAseq_7894	MIMAT0029396	Ictalurus punctatus	miR-124a	ipu-miR-124a	20	100	9e-06	40.1
RNAseq_7894	MIMAT0015747	Pongo pygmaeus	miR-124	ppy-miR-124	20	100	9e-06	40.1
RNAseq_7894	MIMAT0012906	Equus caballus	miR-124	eca-miR-124	20	100	9e-06	40.1
RNAseq_7894	MIMAT0011645	Pristionchus pacificus	miR-124	ppc-miR-124	20	100	9e-06	40.1
RNAseq_7894	MIMAT0011541	Caenorhabditis remanei	miR-124	crm-miR-124	20	100	9e-06	40.1
RNAseq_7894	MIMAT0000828	Rattus norvegicus	miR-124-3p	rno-miR-124-3p	20	100	9e-06	40.1
RNAseq_7894	MIMAT0000422	Homo sapiens	miR-124-3p	hsa-miR-124-3p	20	100	9e-06	40.1
RNAseq_7894	MIMAT0000134	Mus musculus	miR-124-3p	mmu-miR-124-3p	20	100	9e-06	40.1
RNAseq_8606	MIMAT0018570	Apis mellifera	miR-3791	ame-miR-3791	21	95.24	0.0006	34.2
RNAseq_8606	MIMAT0015707	Nasonia vitripennis	miR-3478	nvi-miR-3478	21	95.24	0.0006	34.2
RNAseq_8772	MIMAT0024299	Gorilla gorilla	miR-200b	ggo-miR-200b	22	100	6e-07	44.1
RNAseq_8772	MIMAT0023842	Cricetulus griseus	miR-200b	cgr-miR-200b	22	100	6e-07	44.1
RNAseq_8772	MIMAT0000875	Rattus norvegicus	miR-200b-3p	rno-miR-200b-3p	22	100	6e-07	44.1
RNAseq_8772	MIMAT0031607	Branchiostoma belcheri	miR-200a-5p	bbe-miR-200a-5p	21	100	2e-06	42.1
RNAseq_8772	MIMAT0029454	Ictalurus punctatus	miR-200b	ipu-miR-200b	21	100	2e-06	42.1
RNAseq_8772	MIMAT0026259	Cyprinus carpio	miR-200b	ccr-miR-200b	21	100	2e-06	42.1
RNAseq_8772	MIMAT0021847	Anolis carolinensis	miR-200b-3p	aca-miR-200b-3p	21	100	2e-06	42.1
RNAseq_8772	MIMAT0014592	Taeniopygia guttata	miR-200b-3p	tgu-miR-200b-3p	21	100	2e-06	42.1
RNAseq_8772	MIMAT0012910	Equus caballus	miR-200b	eca-miR-200b	21	100	2e-06	42.1
RNAseq_8772	MIMAT0009491	Branchiostoma floridae	miR-200a	bfl-miR-200a	21	100	2e-06	42.1
RNAseq_8772	MIMAT0006133	Ciona savignyi	miR-200	csa-miR-200	21	100	2e-06	42.1
RNAseq_8772	MIMAT0006938	Ornithorhynchus anatinus	miR-200b-3p	oan-miR-200b-3p	21	100	2e-06	42.1
RNAseq_8772	MIMAT0004156	Monodelphis domestica	miR-200b-3p	mdo-miR-200b-3p	21	100	2e-06	42.1
RNAseq_8772	MIMAT0003694	Xenopus tropicalis	miR-200b	xtr-miR-200b	21	100	2e-06	42.1
RNAseq_8772	MIMAT0002984	Tetraodon nigroviridis	miR-200b	tni-miR-200b	21	100	2e-06	42.1
RNAseq_8772	MIMAT0002983	Fugu rubripes	miR-200b	fru-miR-200b	21	100	2e-06	42.1
RNAseq_8772	MIMAT0001862	Danio rerio	miR-200b	dre-miR-200b	21	100	2e-06	42.1
RNAseq_8772	MIMAT0001172	Gallus gallus	miR-200b-3p	gga-miR-200b-3p	21	100	2e-06	42.1
RNAseq_8772	MIMAT0000318	Homo sapiens	miR-200b-3p	hsa-miR-200b-3p	21	100	2e-06	42.1
RNAseq_8772	MIMAT0000233	Mus musculus	miR-200b-3p	mmu-miR-200b-3p	21	100	2e-06	42.1
RNAseq_8772	MIMAT0030043	Ovis aries	miR-200b	oar-miR-200b	20	100	9e-06	40.1
RNAseq_8772	MIMAT0029455	Ictalurus punctatus	miR-200c	ipu-miR-200c	20	100	9e-06	40.1
RNAseq_8772	MIMAT0022572	Oryzias latipes	miR-200b	ola-miR-200b	20	100	9e-06	40.1
RNAseq_8772	MIMAT0019510	Petromyzon marinus	miR-200b-3p	pma-miR-200b-3p	20	100	9e-06	40.1
RNAseq_8772	MIMAT0003842	Bos taurus	miR-200b	bta-miR-200b	20	100	9e-06	40.1
RNAseq_8772	MIMAT0001863	Danio rerio	miR-200c	dre-miR-200c	20	100	9e-06	40.1
RNAseq_8772	MIMAT0031609	Branchiostoma belcheri	miR-200b-5p	bbe-miR-200b-5p	20	95	0.002	32.2
RNAseq_8772	MIMAT0009609	Saccoglossus kowalevskii	miR-200	sko-miR-200	20	95	0.002	32.2
RNAseq_8772	MIMAT0009492	Branchiostoma floridae	miR-200b	bfl-miR-200b	20	95	0.002	32.2
RNAseq_10211	MIMAT0016393	Ciona intestinalis	miR-1-3p	cin-miR-1-3p	20	95	0.002	32.2
RNAseq_10623	MIMAT0031666	Branchiostoma belcheri	miR-31-5p	bbe-miR-31-5p	22	95.45	0.0001	36.2
RNAseq_10623	MIMAT0022649	Oryzias latipes	miR-31	ola-miR-31	22	95.45	0.0001	36.2
RNAseq_10623	MIMAT0009473	Branchiostoma floridae	miR-31-5p	bfl-miR-31-5p	22	95.45	0.0001	36.2
RNAseq_10623	MIMAT0006599	Canis familiaris	miR-31	cfa-miR-31	23	91.3	0.009	30,2RNAseq_11622
RNAseq_11622	MIMAT0029399	Ictalurus punctatus	miR-125c	ipu-miR-125c	22	95.45	0.0001	36.2
RNAseq_11622	MIMAT0026205	Cyprinus carpio	miR-125c	ccr-miR-125c	22	95.45	0.0001	36.2
RNAseq_11622	MIMAT0001822	Danio rerio	miR-125c	dre-miR-125c	22	95.45	0.0001	36.2
RNAseq_12211	MIMAT0012049	Bos taurus	miR-2462	bta-miR-2462	21	95.24	0.0006	34.2
RNAseq_12597	MIMAT0031676	Branchiostoma belcheri	miR-375-3p	bbe-miR-375-3p	22	100	6e-07	44.1
RNAseq_12597	MIMAT0026295	Cyprinus carpio	miR-375	ccr-miR-375	22	100	6e-07	44.1
RNAseq_12597	MIMAT0021951	Anolis carolinensis	miR-375-3p	aca-miR-375-3p	22	100	6e-07	44.1
RNAseq_12597	MIMAT0019543	Petromyzon marinus	miR-375a-3p	pma-miR-375a-3p	22	100	6e-07	44.1
RNAseq_12597	MIMAT0014572	Taeniopygia guttata	miR-375	tgu-miR-375	22	100	6e-07	44.1
RNAseq_12597	MIMAT0009676	Lottia gigantea	miR-375	lgi-miR-375	22	100	6e-07	44.1
RNAseq_12597	MIMAT0005565	Xenopus tropicalis	miR-375	xtr-miR-375	22	100	6e-07	44.1
RNAseq_12597	MIMAT0003362	Gallus gallus	miR-375	gga-miR-375	22	100	6e-07	44.1
RNAseq_12597	MIMAT0003070	Tetraodon nigroviridis	miR-375	tni-miR-375	22	100	6e-07	44.1
RNAseq_12597	MIMAT0003069	Fugu rubripes	miR-375	fru-miR-375	22	100	6e-07	44.1
RNAseq_12597	MIMAT0001876	Danio rerio	miR-375	dre-miR-375	22	100	6e-07	44.1
RNAseq_12597	MIMAT0029508	Ictalurus punctatus	miR-375	ipu-miR-375	21	100	2e-06	42.1
RNAseq_12597	MIMAT0019545	Petromyzon marinus	miR-375b-3p	pma-miR-375b-3p	21	100	2e-06	42.1
RNAseq_12597	MIMAT0024189	Gorilla gorilla	miR-375	ggo-miR-375	20	100	9e-06	40.1
RNAseq_12597	MIMAT0015863	Pongo pygmaeus	miR-375	ppy-miR-375	20	100	9e-06	40.1
RNAseq_12597	MIMAT0009871	Canis familiaris	miR-375	cfa-miR-375	20	100	9e-06	40.1
RNAseq_12597	MIMAT0009501	Branchiostoma floridae	miR-375	bfl-miR-375	20	100	9e-06	40.1
RNAseq_12597	MIMAT0009303	Bos taurus	miR-375	bta-miR-375	20	100	9e-06	40.1
RNAseq_12597	MIMAT0008125	Pan troglodytes	miR-375	ptr-miR-375	20	100	9e-06	40.1
RNAseq_12597	MIMAT0006302	Macaca mulatta	miR-375	mml-miR-375	20	100	9e-06	40.1
RNAseq_12597	MIMAT0005307	Rattus norvegicus	miR-375-3p	rno-miR-375-3p	20	100	9e-06	40.1
RNAseq_12597	MIMAT0004138	Monodelphis domestica	miR-375	mdo-miR-375	20	100	9e-06	40.1
RNAseq_12597	MIMAT0000739	Mus musculus	miR-375-3p	mmu-miR-375-3p	20	100	9e-06	40.1
RNAseq_12597	MIMAT0000728	Homo sapiens	miR-375	hsa-miR-375	20	100	9e-06	40.1
RNAseq_12597	MIMAT0009544	Capitella teleta	miR-375	cte-miR-375	22	95.45	0.0001	36.2
RNAseq_12929	MIMAT0030657	Panagrellus redivivus	miR-87-3p	prd-miR-87-3p	21	100	2e-06	42.1
RNAseq_12929	MIMAT0029721	Caenorhabditis brenneri	miR-87	cbn-miR-87	21	100	2e-06	42.1
RNAseq_12929	MIMAT0023347	Haemonchus contortus	miR-87a	hco-miR-87a	21	100	2e-06	42.1
RNAseq_12929	MIMAT0023067	Tetranychus urticae	miR-87-3p	tur-miR-87-3p	21	100	2e-06	42.1
RNAseq_12929	MIMAT0014739	Acyrthosiphon pisum	miR-87a	api-miR-87a	21	100	2e-06	42.1
RNAseq_12929	MIMAT0012707	Ixodes scapularis	miR-87	isc-miR-87	21	100	2e-06	42.1
RNAseq_12929	MIMAT0011644	Pristionchus pacificus	miR-87	ppc-miR-87	21	100	2e-06	42.1
RNAseq_12929	MIMAT0011582	Caenorhabditis remanei	miR-87-3p	crm-miR-87-3p	21	100	2e-06	42.1
RNAseq_12929	MIMAT0009518	Capitella teleta	miR-87a	cte-miR-87a	21	100	2e-06	42.1
RNAseq_12929	MIMAT0008366	Tribolium castaneum	miR-87a-3p	tca-miR-87a-3p	21	100	2e-06	42.1
RNAseq_12929	MIMAT0000060	Caenorhabditis elegans	miR-87-3p	cel-miR-87-3p	21	100	2e-06	42.1
RNAseq_12929	MIMAT0021484	Ascaris suum	miR-87b-3p	asu-miR-87b-3p	20	100	9e-06	40.1
RNAseq_12929	MIMAT0020264	Echinococcus multilocularis	miR-87	emu-miR-87	20	100	9e-06	40.1
RNAseq_12929	MIMAT0020239	Echinococcus granulosus	miR-87-3p	egr-miR-87-3p	20	100	9e-06	40.1
RNAseq_12929	MIMAT0014109	Brugia malayi	miR-87a	bma-miR-87a	20	100	9e-06	40.1
RNAseq_12929	MIMAT0009573	Lottia gigantea	miR-87	lgi-miR-87	20	100	9e-06	40.1
RNAseq_12929	MIMAT0009519	Capitella teleta	miR-87b	cte-miR-87b	20	100	9e-06	40.1
RNAseq_12929	MIMAT0004434	Apis mellifera	miR-87	ame-miR-87	20	100	9e-06	40.1
RNAseq_12929	MIMAT0000492	Caenorhabditis briggsae	miR-87	cbr-miR-87	20	100	9e-06	40.1
RNAseq_12929	MIMAT0024989	Heliconius melpomene	miR-87	hme-miR-87	22	95.45	0.0001	36.2
RNAseq_12929	MIMAT0024435	Manduca sexta	miR-87	mse-miR-87	22	95.45	0.0001	36.2
RNAseq_12929	MIMAT0018769	Tribolium castaneum	miR-87b-3p	tca-miR-87b-3p	22	95.45	0.0001	36.2
RNAseq_12929	MIMAT0014738	Acyrthosiphon pisum	miR-87b	api-miR-87b	22	95.45	0.0001	36.2
RNAseq_12929	MIMAT0014439	Culex quinquefasciatus	miR-87	cqu-miR-87	22	95.45	0.0001	36.2
RNAseq_12929	MIMAT0014252	Aedes aegypti	miR-87	aae-miR-87	22	95.45	0.0001	36.2
RNAseq_12929	MIMAT0023349	Haemonchus contortus	miR-87b	hco-miR-87b	21	95.24	0.0006	34.2
RNAseq_12929	MIMAT0007900	Bombyx mori	miR-87	bmo-miR-87	21	95.24	0.0006	34.2
RNAseq_12929	MIMAT0021482	Ascaris suum	miR-87a-3p	asu-miR-87a-3p	20	95	0.002	32.2
RNAseq_12929	MIMAT0014110	Brugia malayi	miR-87b	bma-miR-87b	20	95	0.002	32.2
RNAseq_12929	MIMAT0009053	Drosophila yakuba	miR-87	dya-miR-87	20	95	0.002	32.2
RNAseq_12929	MIMAT0008982	Drosophila willistoni	miR-87	dwi-miR-87	20	95	0.002	32.2
RNAseq_12929	MIMAT0008974	Drosophila virilis	miR-87	dvi-miR-87	20	95	0.002	32.2
RNAseq_12929	MIMAT0008844	Drosophila simulans	miR-87	dsi-miR-87	20	95	0.002	32.2
RNAseq_12929	MIMAT0008773	Drosophila sechellia	miR-87	dse-miR-87	20	95	0.002	32.2
RNAseq_12929	MIMAT0008733	Drosophila persimilis	miR-87	dpe-miR-87	20	95	0.002	32.2
RNAseq_12929	MIMAT0008662	Drosophila mojavensis	miR-87	dmo-miR-87	20	95	0.002	32.2
RNAseq_12929	MIMAT0008608	Drosophila grimshawi	miR-87	dgr-miR-87	20	95	0.002	32.2
RNAseq_12929	MIMAT0008544	Drosophila erecta	miR-87	der-miR-87	20	95	0.002	32.2
RNAseq_12929	MIMAT0008411	Drosophila ananassae	miR-87	dan-miR-87	20	95	0.002	32.2
RNAseq_12929	MIMAT0001225	Drosophila pseudoobscura	miR-87	dps-miR-87	20	95	0.002	32.2
RNAseq_12929	MIMAT0000361	Drosophila melanogaster	miR-87-3p	dme-miR-87-3p	20	95	0.002	32.2
RNAseq_14749	MIMAT0012709	Ixodes scapularis	miR-993	isc-miR-993	22	100	6e-07	44.1
RNAseq_14749	MIMAT0012676	Daphnia pulex	miR-993	dpu-miR-993	22	100	6e-07	44.1
RNAseq_14749	MIMAT0025000	Heliconius melpomene	miR-993	hme-miR-993	22	95.45	0.0001	36.2
RNAseq_14749	MIMAT0018441	Nasonia longicornis	miR-993	nlo-miR-993	22	95.45	0.0001	36.2
RNAseq_14749	MIMAT0018409	Nasonia giraulti	miR-993	ngi-miR-993	22	95.45	0.0001	36.2
RNAseq_14749	MIMAT0015704	Nasonia vitripennis	miR-993	nvi-miR-993	22	95.45	0.0001	36.2
RNAseq_14749	MIMAT0014135	Acyrthosiphon pisum	miR-993	api-miR-993	22	95.45	0.0001	36.2
RNAseq_14749	MIMAT0012462	Drosophila simulans	miR-993-3p	dsi-miR-993-3p	22	95.45	0.0001	36.2
RNAseq_14749	MIMAT0012264	Drosophila pseudoobscura	miR-993-3p	dps-miR-993-3p	22	95.45	0.0001	36.2
RNAseq_14749	MIMAT0010129	Bombyx mori	miR-993a-3p	bmo-miR-993a-3p	22	95.45	0.0001	36.2
RNAseq_14749	MIMAT0010123	Apis mellifera	miR-993	ame-miR-993	22	95.45	0.0001	36.2
RNAseq_14749	MIMAT0010094	Tribolium castaneum	miR-993-3p	tca-miR-993-3p	22	95.45	0.0001	36.2
RNAseq_14749	MIMAT0005512	Drosophila melanogaster	miR-993-3p	dme-miR-993-3p	22	95.45	0.0001	36.2
RNAseq_14749	MIMAT0010128	Bombyx mori	miR-993b-3p	bmo-miR-993b-3p	20	95	0.002	32.2
RNAseq_21135	MIMAT0030721	Panagrellus redivivus	miR-1-3p	prd-miR-1-3p	22	100	6e-07	44.1
RNAseq_21135	MIMAT0023401	Haemonchus contortus	miR-1	hco-miR-1	22	100	6e-07	44.1
RNAseq_21135	MIMAT0009502	Capitella teleta	miR-1	cte-miR-1	22	100	6e-07	44.1
RNAseq_21135	MIMAT0031592	Branchiostoma belcheri	miR-1-5p	bbe-miR-1-5p	21	100	2e-06	42.1
RNAseq_21135	MIMAT0030347	Hippoglossus hippoglossus	miR-1	hhi-miR-1	21	100	2e-06	42.1
RNAseq_21135	MIMAT0029710	Caenorhabditis brenneri	miR-1	cbn-miR-1	21	100	2e-06	42.1
RNAseq_21135	MIMAT0026194	Cyprinus carpio	miR-1	ccr-miR-1	21	100	2e-06	42.1
RNAseq_21135	MIMAT0025413	Paralichthys olivaceus	miR-1-3p	pol-miR-1-3p	21	100	2e-06	42.1
RNAseq_21135	MIMAT0024078	Gorilla gorilla	miR-1	ggo-miR-1	21	100	2e-06	42.1
RNAseq_21135	MIMAT0022558	Oryzias latipes	miR-1-3p	ola-miR-1-3p	21	100	2e-06	42.1
RNAseq_21135	MIMAT0021840	Anolis carolinensis	miR-1a-3p	aca-miR-1a-3p	21	100	2e-06	42.1
RNAseq_21135	MIMAT0021424	Ascaris suum	miR-1-3p	asu-miR-1-3p	21	100	2e-06	42.1
RNAseq_21135	MIMAT0019368	Petromyzon marinus	miR-1c-3p	pma-miR-1c-3p	21	100	2e-06	42.1
RNAseq_21135	MIMAT0015720	Pongo pygmaeus	miR-1	ppy-miR-1	21	100	2e-06	42.1
RNAseq_21135	MIMAT0014562	Taeniopygia guttata	miR-1-3p	tgu-miR-1-3p	21	100	2e-06	42.1
RNAseq_21135	MIMAT0012994	Equus caballus	miR-1	eca-miR-1	21	100	2e-06	42.1
RNAseq_21135	MIMAT0010187	Sus scrofa	miR-1	ssc-miR-1	21	100	2e-06	42.1
RNAseq_21135	MIMAT0009650	Strongylocentrotus purpuratus	miR-1	spu-miR-1	21	100	2e-06	42.1
RNAseq_21135	MIMAT0009557	Lottia gigantea	miR-1	lgi-miR-1	21	100	2e-06	42.1
RNAseq_21135	MIMAT0009463	Branchiostoma floridae	miR-1-3p	bfl-miR-1-3p	21	100	2e-06	42.1
RNAseq_21135	MIMAT0009214	Bos taurus	miR-1	bta-miR-1	21	100	2e-06	42.1
RNAseq_21135	MIMAT0007946	Pan troglodytes	miR-1	ptr-miR-1	21	100	2e-06	42.1
RNAseq_21135	MIMAT0006656	Canis familiaris	miR-1	cfa-miR-1	21	100	2e-06	42.1
RNAseq_21135	MIMAT0006150	Macaca mulatta	miR-1-3p	mml-miR-1-3p	21	100	2e-06	42.1
RNAseq_21135	MIMAT0006863	Ornithorhynchus anatinus	miR-1a-3p	oan-miR-1a-3p	21	100	2e-06	42.1
RNAseq_21135	MIMAT0005835	Mus musculus	miR-1b-5p	mmu-miR-1b-5p	21	100	2e-06	42.1
RNAseq_21135	MIMAT0004085	Monodelphis domestica	miR-1-3p	mdo-miR-1-3p	21	100	2e-06	42.1
RNAseq_21135	MIMAT0003551	Xenopus tropicalis	miR-1a	xtr-miR-1a	21	100	2e-06	42.1
RNAseq_21135	MIMAT0003072	Tetraodon nigroviridis	miR-1	tni-miR-1	21	100	2e-06	42.1
RNAseq_21135	MIMAT0003071	Fugu rubripes	miR-1	fru-miR-1	21	100	2e-06	42.1
RNAseq_21135	MIMAT0002621	Pan paniscus	miR-1	ppa-miR-1	21	100	2e-06	42.1
RNAseq_21135	MIMAT0001768	Danio rerio	miR-1	dre-miR-1	21	100	2e-06	42.1
RNAseq_21135	MIMAT0001127	Gallus gallus	miR-1a-3p	gga-miR-1a-3p	21	100	2e-06	42.1
RNAseq_21135	MIMAT0000465	Caenorhabditis briggsae	miR-1	cbr-miR-1	21	100	2e-06	42.1
RNAseq_21135	MIMAT0000416	Homo sapiens	miR-1	hsa-miR-1	21	100	2e-06	42.1
RNAseq_21135	MIMAT0000123	Mus musculus	miR-1a-3p	mmu-miR-1a-3p	21	100	2e-06	42.1
RNAseq_21135	MIMAT0000003	Caenorhabditis elegans	miR-1-3p	cel-miR-1-3p	21	100	2e-06	42.1
RNAseq_21135	MIMAT0011639	Pristionchus pacificus	miR-1	ppc-miR-1	20	100	9e-06	40.1
RNAseq_21135	MIMAT0011566	Caenorhabditis remanei	miR-1-3p	crm-miR-1-3p	20	100	9e-06	40.1
RNAseq_21135	MIMAT0006073	Oikopleura dioica	miR-1c	odi-miR-1c	20	100	9e-06	40.1
RNAseq_21135	MIMAT0023725	Cricetulus griseus	miR-1	cgr-miR-1	21	95.24	0.0006	34.2
RNAseq_21135	MIMAT0021843	Anolis carolinensis	miR-1b-3p	aca-miR-1b-3p	21	95.24	0.0006	34.2
RNAseq_21135	MIMAT0017851	Rattus norvegicus	miR-3571	rno-miR-3571	21	95.24	0.0006	34.2
RNAseq_21135	MIMAT0011135	Xenopus laevis	miR-1b	xla-miR-1b	21	95.24	0.0006	34.2
RNAseq_21135	MIMAT0003648	Xenopus tropicalis	miR-1b	xtr-miR-1b	21	95.24	0.0006	34.2
RNAseq_21135	MIMAT0003125	Rattus norvegicus	miR-1-3p	rno-miR-1-3p	21	95.24	0.0006	34.2
RNAseq_21135	MIMAT0001175	Gallus gallus	miR-1b-3p	gga-miR-1b-3p	21	95.24	0.0006	34.2
RNAseq_26104	MIMAT0012705	Ixodes scapularis	miR-79	isc-miR-79	23	95.65	4e-05	38.2
RNAseq_26104	MIMAT0012668	Daphnia pulex	miR-9-3p	dpu-miR-9-3p	23	95.65	4e-05	38.2
RNAseq_26104	MIMAT0010147	Locusta migratoria	miR-9a-3p	lmi-miR-9a-3p	23	95.65	4e-05	38.2
RNAseq_27246	MIMAT0029692	Caenorhabditis brenneri	miR-81	cbn-miR-81	21	95.24	0.0006	34.2
RNAseq_27246	MIMAT0011570	Caenorhabditis remanei	miR-81-3p	crm-miR-81-3p	21	95.24	0.0006	34.2
RNAseq_27246	MIMAT0000488	Caenorhabditis briggsae	miR-81	cbr-miR-81	21	95.24	0.0006	34.2
RNAseq_27246	MIMAT0000054	Caenorhabditis elegans	miR-81-3p	cel-miR-81-3p	21	95.24	0.0006	34.2
RNAseq_28036	MIMAT0012126	Schmidtea mediterranea	miR-755-3p	sme-miR-755-3p	22	95.45	0.0001	36.2
RNAseq_29097	MIMAT0031568	Branchiostoma belcheri	let-7a-5p	bbe-let-7a-5p	20	100	9e-06	40.1
RNAseq_29097	MIMAT0030022	Ovis aries	let-7a	oar-let-7a	20	100	9e-06	40.1
RNAseq_29097	MIMAT0029682	Caenorhabditis brenneri	let-7	cbn-let-7	20	100	9e-06	40.1
RNAseq_29097	MIMAT0029374	Ictalurus punctatus	let-7a	ipu-let-7a	20	100	9e-06	40.1
RNAseq_29097	MIMAT0026189	Cyprinus carpio	let-7a	ccr-let-7a	20	100	9e-06	40.1
RNAseq_29097	MIMAT0024931	Heliconius melpomene	let-7	hme-let-7	20	100	9e-06	40.1
RNAseq_29097	MIMAT0024437	Manduca sexta	let-7a	mse-let-7a	20	100	9e-06	40.1
RNAseq_29097	MIMAT0024074	Gorilla gorilla	let-7a	ggo-let-7a	20	100	9e-06	40.1
RNAseq_29097	MIMAT0023716	Cricetulus griseus	let-7a	cgr-let-7a	20	100	9e-06	40.1
RNAseq_29097	MIMAT0022801	Sarcophilus harrisii	let-7a	sha-let-7a	20	100	9e-06	40.1
RNAseq_29097	MIMAT0022566	Oryzias latipes	let-7a	ola-let-7a	20	100	9e-06	40.1
RNAseq_29097	MIMAT0022549	Oryzias latipes	let-7a-5p	ola-let-7a-5p	20	100	9e-06	40.1
RNAseq_29097	MIMAT0021692	Anolis carolinensis	let-7a-5p	aca-let-7a-5p	20	100	9e-06	40.1
RNAseq_29097	MIMAT0021417	Ascaris suum	let-7-5p	asu-let-7-5p	20	100	9e-06	40.1
RNAseq_29097	MIMAT0019564	Petromyzon marinus	let-7a	pma-let-7a	20	100	9e-06	40.1
RNAseq_29097	MIMAT0018413	Nasonia giraulti	let-7	ngi-let-7	20	100	9e-06	40.1
RNAseq_29097	MIMAT0017886	Rattus norvegicus	miR-3596a	rno-miR-3596a	20	100	9e-06	40.1
RNAseq_29097	MIMAT0015721	Pongo pygmaeus	let-7a	ppy-let-7a	20	100	9e-06	40.1
RNAseq_29097	MIMAT0015678	Nasonia vitripennis	let-7	nvi-let-7	20	100	9e-06	40.1
RNAseq_29097	MIMAT0014519	Taeniopygia guttata	let-7a-5p	tgu-let-7a-5p	20	100	9e-06	40.1
RNAseq_29097	MIMAT0014094	Brugia malayi	let-7	bma-let-7	20	100	9e-06	40.1
RNAseq_29097	MIMAT0013865	Sus scrofa	let-7a	ssc-let-7a	20	100	9e-06	40.1
RNAseq_29097	MIMAT0012979	Equus caballus	let-7a	eca-let-7a	20	100	9e-06	40.1
RNAseq_29097	MIMAT0012680	Ixodes scapularis	let-7	isc-let-7	20	100	9e-06	40.1
RNAseq_29097	MIMAT0011657	Pristionchus pacificus	let-7	ppc-let-7	20	100	9e-06	40.1
RNAseq_29097	MIMAT0011519	Caenorhabditis remanei	let-7	crm-let-7	20	100	9e-06	40.1
RNAseq_29097	MIMAT0010006	Branchiostoma floridae	let-7b	bfl-let-7b	20	100	9e-06	40.1
RNAseq_29097	MIMAT0009644	Saccoglossus kowalevskii	let-7	sko-let-7	20	100	9e-06	40.1
RNAseq_29097	MIMAT0009604	Lottia gigantea	let-7	lgi-let-7	20	100	9e-06	40.1
RNAseq_29097	MIMAT0009552	Capitella teleta	let-7	cte-let-7	20	100	9e-06	40.1
RNAseq_29097	MIMAT0009462	Branchiostoma floridae	let-7a-5p	bfl-let-7a-5p	20	100	9e-06	40.1
RNAseq_29097	MIMAT0009098	Drosophila yakuba	let-7	dya-let-7	20	100	9e-06	40.1
RNAseq_29097	MIMAT0008996	Drosophila willistoni	let-7	dwi-let-7	20	100	9e-06	40.1
RNAseq_29097	MIMAT0008980	Drosophila virilis	let-7	dvi-let-7	20	100	9e-06	40.1
RNAseq_29097	MIMAT0008876	Drosophila simulans	let-7	dsi-let-7	20	100	9e-06	40.1
RNAseq_29097	MIMAT0008837	Drosophila sechellia	let-7	dse-let-7	20	100	9e-06	40.1
RNAseq_29097	MIMAT0008699	Drosophila persimilis	let-7	dpe-let-7	20	100	9e-06	40.1
RNAseq_29097	MIMAT0008686	Drosophila mojavensis	let-7	dmo-let-7	20	100	9e-06	40.1
RNAseq_29097	MIMAT0008596	Drosophila grimshawi	let-7	dgr-let-7	20	100	9e-06	40.1
RNAseq_29097	MIMAT0008486	Drosophila erecta	let-7	der-let-7	20	100	9e-06	40.1
RNAseq_29097	MIMAT0008467	Drosophila ananassae	let-7	dan-let-7	20	100	9e-06	40.1
RNAseq_29097	MIMAT0008354	Tribolium castaneum	let-7-5p	tca-let-7-5p	20	100	9e-06	40.1
RNAseq_29097	MIMAT0007936	Pan troglodytes	let-7a	ptr-let-7a	20	100	9e-06	40.1
RNAseq_29097	MIMAT0006594	Canis familiaris	let-7a	cfa-let-7a	20	100	9e-06	40.1
RNAseq_29097	MIMAT0006151	Macaca mulatta	let-7a-5p	mml-let-7a-5p	20	100	9e-06	40.1
RNAseq_29097	MIMAT0004418	Apis mellifera	let-7	ame-let-7	20	100	9e-06	40.1
RNAseq_29097	MIMAT0004141	Monodelphis domestica	let-7a-5p	mdo-let-7a-5p	20	100	9e-06	40.1
RNAseq_29097	MIMAT0003844	Bos taurus	let-7a-5p	bta-let-7a-5p	20	100	9e-06	40.1
RNAseq_29097	MIMAT0004190	Bombyx mori	let-7-5p	bmo-let-7-5p	20	100	9e-06	40.1
RNAseq_29097	MIMAT0003667	Xenopus tropicalis	let-7a	xtr-let-7a	20	100	9e-06	40.1
RNAseq_29097	MIMAT0002929	Tetraodon nigroviridis	let-7a	tni-let-7a	20	100	9e-06	40.1
RNAseq_29097	MIMAT0002928	Fugu rubripes	let-7a	fru-let-7a	20	100	9e-06	40.1
RNAseq_29097	MIMAT0001759	Danio rerio	let-7a	dre-let-7a	20	100	9e-06	40.1
RNAseq_29097	MIMAT0001198	Drosophila pseudoobscura	let-7	dps-let-7	20	100	9e-06	40.1
RNAseq_29097	MIMAT0001181	Gallus gallus	let-7j-5p	gga-let-7j-5p	20	100	9e-06	40.1
RNAseq_29097	MIMAT0001101	Gallus gallus	let-7a-5p	gga-let-7a-5p	20	100	9e-06	40.1
RNAseq_29097	MIMAT0000774	Rattus norvegicus	let-7a-5p	rno-let-7a-5p	20	100	9e-06	40.1
RNAseq_29097	MIMAT0000521	Mus musculus	let-7a-5p	mmu-let-7a-5p	20	100	9e-06	40.1
RNAseq_29097	MIMAT0000463	Caenorhabditis briggsae	let-7	cbr-let-7	20	100	9e-06	40.1
RNAseq_29097	MIMAT0000396	Drosophila melanogaster	let-7-5p	dme-let-7-5p	20	100	9e-06	40.1
RNAseq_29097	MIMAT0000062	Homo sapiens	let-7a-5p	hsa-let-7a-5p	20	100	9e-06	40.1
RNAseq_29097	MIMAT0000001	Caenorhabditis elegans	let-7-5p	cel-let-7-5p	20	100	9e-06	40.1
RNAseq_29097	MIMAT0030024	Ovis aries	let-7f	oar-let-7f	20	95	0.002	32.2
RNAseq_29097	MIMAT0029380	Ictalurus punctatus	let-7g	ipu-let-7g	20	95	0.002	32.2
RNAseq_29097	MIMAT0029379	Ictalurus punctatus	let-7f	ipu-let-7f	20	95	0.002	32.2
RNAseq_29097	MIMAT0031134	Artibeus jamaicensis	miR-3596	aja-miR-3596	20	95	0.002	32.2
RNAseq_29097	MIMAT0026191	Cyprinus carpio	let-7g	ccr-let-7g	20	95	0.002	32.2
RNAseq_29097	MIMAT0024079	Gorilla gorilla	let-7e	ggo-let-7e	20	95	0.002	32.2
RNAseq_29097	MIMAT0024073	Gorilla gorilla	let-7f	ggo-let-7f	20	95	0.002	32.2
RNAseq_29097	MIMAT0023721	Cricetulus griseus	let-7f	cgr-let-7f	20	95	0.002	32.2
RNAseq_29097	MIMAT0022563	Oryzias latipes	let-7g	ola-let-7g	20	95	0.002	32.2
RNAseq_29097	MIMAT0021703	Anolis carolinensis	let-7f-5p	aca-let-7f-5p	20	95	0.002	32.2
RNAseq_29097	MIMAT0017877	Rattus norvegicus	miR-3596c	rno-miR-3596c	20	95	0.002	32.2
RNAseq_29097	MIMAT0017823	Rattus norvegicus	miR-3596d	rno-miR-3596d	20	95	0.002	32.2
RNAseq_29097	MIMAT0015726	Pongo pygmaeus	let-7f	ppy-let-7f	20	95	0.002	32.2
RNAseq_29097	MIMAT0015725	Pongo pygmaeus	let-7e	ppy-let-7e	20	95	0.002	32.2
RNAseq_29097	MIMAT0014530	Taeniopygia guttata	let-7f-5p	tgu-let-7f-5p	20	95	0.002	32.2
RNAseq_29097	MIMAT0013866	Sus scrofa	let-7e	ssc-let-7e	20	95	0.002	32.2
RNAseq_29097	MIMAT0013111	Equus caballus	let-7f	eca-let-7f	20	95	0.002	32.2
RNAseq_29097	MIMAT0013007	Equus caballus	let-7e	eca-let-7e	20	95	0.002	32.2
RNAseq_29097	MIMAT0009649	Strongylocentrotus purpuratus	let-7	spu-let-7	20	95	0.002	32.2
RNAseq_29097	MIMAT0007941	Pan troglodytes	let-7f	ptr-let-7f	20	95	0.002	32.2
RNAseq_29097	MIMAT0007940	Pan troglodytes	let-7e	ptr-let-7e	20	95	0.002	32.2
RNAseq_29097	MIMAT0006610	Canis familiaris	let-7f	cfa-let-7f	20	95	0.002	32.2
RNAseq_29097	MIMAT0006608	Canis familiaris	let-7e	cfa-let-7e	20	95	0.002	32.2
RNAseq_29097	MIMAT0006156	Macaca mulatta	let-7f-5p	mml-let-7f-5p	20	95	0.002	32.2
RNAseq_29097	MIMAT0006155	Macaca mulatta	let-7e-5p	mml-let-7e-5p	20	95	0.002	32.2
RNAseq_29097	MIMAT0007179	Ornithorhynchus anatinus	let-7f-5p	oan-let-7f-5p	20	95	0.002	32.2
RNAseq_29097	MIMAT0004333	Bos taurus	let-7e	bta-let-7e	20	95	0.002	32.2
RNAseq_29097	MIMAT0004161	Monodelphis domestica	let-7f-5p	mdo-let-7f-5p	20	95	0.002	32.2
RNAseq_29097	MIMAT0003645	Xenopus tropicalis	let-7f	xtr-let-7f	20	95	0.002	32.2
RNAseq_29097	MIMAT0003519	Bos taurus	let-7f	bta-let-7f	20	95	0.002	32.2
RNAseq_29097	MIMAT0003098	Tetraodon nigroviridis	let-7g	tni-let-7g	20	95	0.002	32.2
RNAseq_29097	MIMAT0003097	Fugu rubripes	let-7g	fru-let-7g	20	95	0.002	32.2
RNAseq_29097	MIMAT0002152	Sus scrofa	let-7f	ssc-let-7f	20	95	0.002	32.2
RNAseq_29097	MIMAT0001765	Danio rerio	let-7g	dre-let-7g	20	95	0.002	32.2
RNAseq_29097	MIMAT0001764	Danio rerio	let-7f	dre-let-7f	20	95	0.002	32.2
RNAseq_29097	MIMAT0001162	Gallus gallus	let-7f-5p	gga-let-7f-5p	20	95	0.002	32.2
RNAseq_29097	MIMAT0000778	Rattus norvegicus	let-7f-5p	rno-let-7f-5p	20	95	0.002	32.2
RNAseq_29097	MIMAT0000777	Rattus norvegicus	let-7e-5p	rno-let-7e-5p	20	95	0.002	32.2
RNAseq_29097	MIMAT0000525	Mus musculus	let-7f-5p	mmu-let-7f-5p	20	95	0.002	32.2
RNAseq_29097	MIMAT0000524	Mus musculus	let-7e-5p	mmu-let-7e-5p	20	95	0.002	32.2
RNAseq_29097	MIMAT0000067	Homo sapiens	let-7f-5p	hsa-let-7f-5p	20	95	0.002	32.2
RNAseq_29097	MIMAT0000066	Homo sapiens	let-7e-5p	hsa-let-7e-5p	20	95	0.002	32.2
RNAseq_29612	MIMAT0015477	Bombyx mori	miR-3290	bmo-miR-3290	20	95	0.002	32.2
RNAseq_30832	MIMAT0030579	Panagrellus redivivus	miR-61-3p	prd-miR-61-3p	20	95	0.002	32.2
RNAseq_30832	MIMAT0021512	Ascaris suum	miR-279a-3p	asu-miR-279a-3p	20	95	0.002	32.2
RNAseq_30832	MIMAT0011736	Pristionchus pacificus	miR-279	ppc-miR-279	20	95	0.002	32.2
RNAseq_31722	MIMAT0014408	Culex quinquefasciatus	miR-8-5p	cqu-miR-8-5p	22	100	6e-07	44.1
RNAseq_31722	MIMAT0014214	Aedes aegypti	miR-8-5p	aae-miR-8-5p	22	100	6e-07	44.1
RNAseq_31722	MIMAT0010148	Locusta migratoria	miR-8-5p	lmi-miR-8-5p	22	100	6e-07	44.1
RNAseq_31722	MIMAT0019100	Tribolium castaneum	miR-8-5p	tca-miR-8-5p	22	100	6e-07	44.1
RNAseq_31722	MIMAT0015224	Bombyx mori	miR-8-5p	bmo-miR-8-5p	22	100	6e-07	44.1
RNAseq_31722	MIMAT0020791	Drosophila melanogaster	miR-8-5p	dme-miR-8-5p	22	100	6e-07	44.1
RNAseq_36410	MIMAT0031744	Brugia malayi	miR-252	bma-miR-252	23	100	2e-07	46.1
RNAseq_36410	MIMAT0021509	Ascaris suum	miR-252-5p	asu-miR-252-5p	23	100	2e-07	46.1
RNAseq_36410	MIMAT0009639	Saccoglossus kowalevskii	miR-252b	sko-miR-252b	23	100	2e-07	46.1
RNAseq_36410	MIMAT0030524	Panagrellus redivivus	miR-252-5p	prd-miR-252-5p	22	100	6e-07	44.1
RNAseq_36410	MIMAT0031056	Caenorhabditis brenneri	miR-251b	cbn-miR-251b	22	100	6e-07	44.1
RNAseq_36410	MIMAT0012648	Daphnia pulex	miR-252b	dpu-miR-252b	22	100	6e-07	44.1
RNAseq_36410	MIMAT0009673	Strongylocentrotus purpuratus	miR-252b	spu-miR-252b	22	100	6e-07	44.1
RNAseq_36410	MIMAT0009537	Capitella teleta	miR-252b	cte-miR-252b	22	100	6e-07	44.1
RNAseq_36410	MIMAT0000507	Caenorhabditis briggsae	miR-252	cbr-miR-252	22	100	6e-07	44.1
RNAseq_36410	MIMAT0000308	Caenorhabditis elegans	miR-252-5p	cel-miR-252-5p	22	100	6e-07	44.1
RNAseq_36410	MIMAT0012691	Ixodes scapularis	miR-252b	isc-miR-252b	21	100	2e-06	42.1
RNAseq_36410	MIMAT0011649	Pristionchus pacificus	miR-252	ppc-miR-252	21	100	2e-06	42.1
RNAseq_36410	MIMAT0011534	Caenorhabditis remanei	miR-252	crm-miR-252	20	100	9e-06	40.1
RNAseq_36410	MIMAT0023372	Haemonchus contortus	miR-252	hco-miR-252	23	95.65	4e-05	38.2
RNAseq_36410	MIMAT0031655	Branchiostoma belcheri	miR-252a-5p	bbe-miR-252a-5p	21	95.24	0.0006	34.2
RNAseq_36410	MIMAT0009682	Lottia gigantea	miR-252b	lgi-miR-252b	21	95.24	0.0006	34.2
RNAseq_36410	MIMAT0009498	Branchiostoma floridae	miR-252a	bfl-miR-252a	21	95.24	0.0006	34.2
RNAseq_36410	MIMAT0018804	Tribolium castaneum	miR-252a-5p	tca-miR-252a-5p	20	95	0.002	32.2
RNAseq_41931	MIMAT0024449	Manduca sexta	miR-10a	mse-miR-10a	23	100	2e-07	46.1
RNAseq_41931	MIMAT0014405	Culex quinquefasciatus	miR-10-3p	cqu-miR-10-3p	23	100	2e-07	46.1
RNAseq_41931	MIMAT0019101	Tribolium castaneum	miR-10-3p	tca-miR-10-3p	23	100	2e-07	46.1
RNAseq_41931	MIMAT0015226	Bombyx mori	miR-10-3p	bmo-miR-10-3p	23	100	2e-07	46.1
RNAseq_41931	MIMAT0012531	Drosophila melanogaster	miR-10-3p	dme-miR-10-3p	23	100	2e-07	46.1
RNAseq_41931	MIMAT0010145	Locusta migratoria	miR-10-3p	lmi-miR-10-3p	22	100	6e-07	44.1
RNAseq_41931	MIMAT0023027	Tetranychus urticae	miR-10-3p	tur-miR-10-3p	21	95.24	0.0006	34.2
RNAseq_46997	MIMAT0029694	Caenorhabditis brenneri	miR-82	cbn-miR-82	21	95.24	0.0006	34.2
RNAseq_46997	MIMAT0011539	Caenorhabditis remanei	miR-82	crm-miR-82	21	95.24	0.0006	34.2
RNAseq_46997	MIMAT0000489	Caenorhabditis briggsae	miR-82	cbr-miR-82	21	95.24	0.0006	34.2
RNAseq_46997	MIMAT0000055	Caenorhabditis elegans	miR-82-3p	cel-miR-82-3p	21	95.24	0.0006	34.2
RNAseq_50404	MIMAT0023779	Cricetulus griseus	miR-148b-3p	cgr-miR-148b-3p	22	100	6e-07	44.1
RNAseq_50404	MIMAT0021783	Anolis carolinensis	miR-148b-3p	aca-miR-148b-3p	22	100	6e-07	44.1
RNAseq_50404	MIMAT0015772	Pongo pygmaeus	miR-148b	ppy-miR-148b	22	100	6e-07	44.1
RNAseq_50404	MIMAT0013901	Sus scrofa	miR-148b-3p	ssc-miR-148b-3p	22	100	6e-07	44.1
RNAseq_50404	MIMAT0012972	Equus caballus	miR-148b-3p	eca-miR-148b-3p	22	100	6e-07	44.1
RNAseq_50404	MIMAT0008042	Pan troglodytes	miR-148b	ptr-miR-148b	22	100	6e-07	44.1
RNAseq_50404	MIMAT0006663	Canis familiaris	miR-148b	cfa-miR-148b	22	100	6e-07	44.1
RNAseq_50404	MIMAT0006209	Macaca mulatta	miR-148b-3p	mml-miR-148b-3p	22	100	6e-07	44.1
RNAseq_50404	MIMAT0003814	Bos taurus	miR-148b	bta-miR-148b	22	100	6e-07	44.1
RNAseq_50404	MIMAT0003605	Xenopus tropicalis	miR-148b	xtr-miR-148b	22	100	6e-07	44.1
RNAseq_50404	MIMAT0000759	Homo sapiens	miR-148b-3p	hsa-miR-148b-3p	22	100	6e-07	44.1
RNAseq_50404	MIMAT0000580	Mus musculus	miR-148b-3p	mmu-miR-148b-3p	22	100	6e-07	44.1
RNAseq_50404	MIMAT0000579	Rattus norvegicus	miR-148b-3p	rno-miR-148b-3p	22	100	6e-07	44.1
RNAseq_50404	MIMAT0024108	Gorilla gorilla	miR-148b	ggo-miR-148b	21	100	2e-06	42.1
RNAseq_50404	MIMAT0029425	Ictalurus punctatus	miR-148	ipu-miR-148	22	95.45	0.0001	36.2
RNAseq_50404	MIMAT0026227	Cyprinus carpio	miR-148	ccr-miR-148	22	95.45	0.0001	36.2
RNAseq_50404	MIMAT0022578	Oryzias latipes	miR-152	ola-miR-152	22	95.45	0.0001	36.2
RNAseq_50404	MIMAT0003104	Tetraodon nigroviridis	miR-152	tni-miR-152	22	95.45	0.0001	36.2
RNAseq_50404	MIMAT0003103	Fugu rubripes	miR-152	fru-miR-152	22	95.45	0.0001	36.2
RNAseq_50404	MIMAT0002962	Tetraodon nigroviridis	miR-148	tni-miR-148	22	95.45	0.0001	36.2
RNAseq_50404	MIMAT0002961	Fugu rubripes	miR-148	fru-miR-148	22	95.45	0.0001	36.2
RNAseq_50404	MIMAT0001845	Danio rerio	miR-148	dre-miR-148	22	95.45	0.0001	36.2
RNAseq_50404	MIMAT0029427	Ictalurus punctatus	miR-152	ipu-miR-152	21	95.24	0.0006	34.2
RNAseq_50404	MIMAT0001847	Danio rerio	miR-152	dre-miR-152	21	95.24	0.0006	34.2
RNAseq_50404	MIMAT0030033	Ovis aries	miR-148a	oar-miR-148a	22	90.91	0.035	28.2
RNAseq_50404	MIMAT0021781	Anolis carolinensis	miR-148a-3p	aca-miR-148a-3p	22	90.91	0.035	28.2
RNAseq_50404	MIMAT0015771	Pongo pygmaeus	miR-148a	ppy-miR-148a	22	90.91	0.035	28.2
RNAseq_50404	MIMAT0014503	Taeniopygia guttata	miR-148-3p	tgu-miR-148-3p	22	90.91	0.035	28.2
RNAseq_50404	MIMAT0012935	Equus caballus	miR-148a	eca-miR-148a	22	90.91	0.035	28.2
RNAseq_50404	MIMAT0012737	Monodelphis domestica	miR-148-3p	mdo-miR-148-3p	22	90.91	0.035	28.2
RNAseq_50404	MIMAT0008041	Pan troglodytes	miR-148a	ptr-miR-148a	22	90.91	0.035	28.2
RNAseq_50404	MIMAT0006622	Canis familiaris	miR-148a	cfa-miR-148a	22	90.91	0.035	28.2
RNAseq_50404	MIMAT0006208	Macaca mulatta	miR-148a-3p	mml-miR-148a-3p	22	90.91	0.035	28.2
RNAseq_50404	MIMAT0007138	Ornithorhynchus anatinus	miR-148-3p	oan-miR-148-3p	22	90.91	0.035	28.2
RNAseq_50404	MIMAT0003664	Xenopus tropicalis	miR-148a	xtr-miR-148a	22	90.91	0.035	28.2
RNAseq_50404	MIMAT0003522	Bos taurus	miR-148a	bta-miR-148a	22	90.91	0.035	28.2
RNAseq_50404	MIMAT0002124	Sus scrofa	miR-148a-3p	ssc-miR-148a-3p	22	90.91	0.035	28.2
RNAseq_50404	MIMAT0001120	Gallus gallus	miR-148a-3p	gga-miR-148a-3p	22	90.91	0.035	28.2
RNAseq_50404	MIMAT0000516	Mus musculus	miR-148a-3p	mmu-miR-148a-3p	22	90.91	0.035	28.2
RNAseq_50404	MIMAT0000243	Homo sapiens	miR-148a-3p	hsa-miR-148a-3p	22	90.91	0.035	28.2
RNAseq_50885	MIMAT0030026	Ovis aries	let-7i	oar-let-7i	20	100	9e-06	40.1
RNAseq_50885	MIMAT0029382	Ictalurus punctatus	let-7i	ipu-let-7i	20	100	9e-06	40.1
RNAseq_50885	MIMAT0026192	Cyprinus carpio	let-7i	ccr-let-7i	20	100	9e-06	40.1
RNAseq_50885	MIMAT0024083	Gorilla gorilla	let-7i	ggo-let-7i	20	100	9e-06	40.1
RNAseq_50885	MIMAT0022822	Sarcophilus harrisii	let-7i	sha-let-7i	20	100	9e-06	40.1
RNAseq_50885	MIMAT0021707	Anolis carolinensis	let-7i-5p	aca-let-7i-5p	20	100	9e-06	40.1
RNAseq_50885	MIMAT0015728	Pongo pygmaeus	let-7i	ppy-let-7i	20	100	9e-06	40.1
RNAseq_50885	MIMAT0014504	Taeniopygia guttata	let-7i-5p	tgu-let-7i-5p	20	100	9e-06	40.1
RNAseq_50885	MIMAT0007943	Pan troglodytes	let-7i	ptr-let-7i	20	100	9e-06	40.1
RNAseq_50885	MIMAT0006158	Macaca mulatta	let-7i-5p	mml-let-7i-5p	20	100	9e-06	40.1
RNAseq_50885	MIMAT0004143	Monodelphis domestica	let-7i-5p	mdo-let-7i-5p	20	100	9e-06	40.1
RNAseq_50885	MIMAT0003851	Bos taurus	let-7i	bta-let-7i	20	100	9e-06	40.1
RNAseq_50885	MIMAT0003647	Xenopus tropicalis	let-7i	xtr-let-7i	20	100	9e-06	40.1
RNAseq_50885	MIMAT0002978	Tetraodon nigroviridis	let-7i	tni-let-7i	20	100	9e-06	40.1
RNAseq_50885	MIMAT0002977	Fugu rubripes	let-7i	fru-let-7i	20	100	9e-06	40.1
RNAseq_50885	MIMAT0001767	Danio rerio	let-7i	dre-let-7i	20	100	9e-06	40.1
RNAseq_50885	MIMAT0001098	Gallus gallus	let-7i	gga-let-7i	20	100	9e-06	40.1
RNAseq_50885	MIMAT0000779	Rattus norvegicus	let-7i-5p	rno-let-7i-5p	20	100	9e-06	40.1
RNAseq_50885	MIMAT0000415	Homo sapiens	let-7i-5p	hsa-let-7i-5p	20	100	9e-06	40.1
RNAseq_50885	MIMAT0000122	Mus musculus	let-7i-5p	mmu-let-7i-5p	20	100	9e-06	40.1
RNAseq_50885	MIMAT0025123	Mus musculus	let-7j	mmu-let-7j	20	95	0.002	32.2
RNAseq_51066	MIMAT0019047	Homo sapiens	miR-4510	hsa-miR-4510	22	95.45	0.0001	36.2
RNAseq_51066	MIMAT0024109	Gorilla gorilla	miR-4510	ggo-miR-4510	21	95.24	0.0006	34.2
RNAseq_51066	MIMAT0024027	Pan troglodytes	miR-4510	ptr-miR-4510	21	95.24	0.0006	34.2
RNAseq_52330	MIMAT0019098	Tribolium castaneum	let-7-3p	tca-let-7-3p	22	90.91	0.035	28.2
RNAseq_52752	MIMAT0029748	Caenorhabditis brenneri	miR-79	cbn-miR-79	20	100	9e-06	40.1
RNAseq_52752	MIMAT0023326	Haemonchus contortus	miR-79	hco-miR-79	20	100	9e-06	40.1
RNAseq_52752	MIMAT0021473	Ascaris suum	miR-79-3p	asu-miR-79-3p	20	100	9e-06	40.1
RNAseq_52752	MIMAT0014108	Brugia malayi	miR-9-3p	bma-miR-9-3p	20	100	9e-06	40.1
RNAseq_52752	MIMAT0011652	Pristionchus pacificus	miR-79	ppc-miR-79	20	100	9e-06	40.1
RNAseq_52752	MIMAT0011556	Caenorhabditis remanei	miR-79-3p	crm-miR-79-3p	20	100	9e-06	40.1
RNAseq_52752	MIMAT0009661	Strongylocentrotus purpuratus	miR-9-3p	spu-miR-9-3p	20	100	9e-06	40.1
RNAseq_52752	MIMAT0009618	Saccoglossus kowalevskii	miR-79	sko-miR-79	20	100	9e-06	40.1
RNAseq_52752	MIMAT0009572	Lottia gigantea	miR-79	lgi-miR-79	20	100	9e-06	40.1
RNAseq_52752	MIMAT0000486	Caenorhabditis briggsae	miR-79	cbr-miR-79	20	100	9e-06	40.1
RNAseq_52752	MIMAT0000051	Caenorhabditis elegans	miR-79-3p	cel-miR-79-3p	20	100	9e-06	40.1
RNAseq_56523	MIMAT0029488	Ictalurus punctatus	miR-27b	ipu-miR-27b	20	95	0.002	32.2
RNAseq_56523	MIMAT0024112	Gorilla gorilla	miR-27b	ggo-miR-27b	20	95	0.002	32.2
RNAseq_56523	MIMAT0023877	Cricetulus griseus	miR-27b-3p	cgr-miR-27b-3p	20	95	0.002	32.2
RNAseq_56523	MIMAT0022789	Sarcophilus harrisii	miR-27b	sha-miR-27b	20	95	0.002	32.2
RNAseq_56523	MIMAT0021908	Anolis carolinensis	miR-27b-3p	aca-miR-27b-3p	20	95	0.002	32.2
RNAseq_56523	MIMAT0019415	Petromyzon marinus	miR-27b-3p	pma-miR-27b-3p	20	95	0.002	32.2
RNAseq_56523	MIMAT0015734	Pongo pygmaeus	miR-27b	ppy-miR-27b	20	95	0.002	32.2
RNAseq_56523	MIMAT0014534	Taeniopygia guttata	miR-27-3p	tgu-miR-27-3p	20	95	0.002	32.2
RNAseq_56523	MIMAT0013890	Sus scrofa	miR-27b-3p	ssc-miR-27b-3p	20	95	0.002	32.2
RNAseq_56523	MIMAT0013114	Equus caballus	miR-27b	eca-miR-27b	20	95	0.002	32.2
RNAseq_56523	MIMAT0008078	Pan troglodytes	miR-27b	ptr-miR-27b	20	95	0.002	32.2
RNAseq_56523	MIMAT0006613	Canis familiaris	miR-27b	cfa-miR-27b	20	95	0.002	32.2
RNAseq_56523	MIMAT0006167	Macaca mulatta	miR-27b-3p	mml-miR-27b-3p	20	95	0.002	32.2
RNAseq_56523	MIMAT0006957	Ornithorhynchus anatinus	miR-27b-3p	oan-miR-27b-3p	20	95	0.002	32.2
RNAseq_56523	MIMAT0004177	Monodelphis domestica	miR-27b-3p	mdo-miR-27b-3p	20	95	0.002	32.2
RNAseq_56523	MIMAT0003571	Xenopus tropicalis	miR-27b	xtr-miR-27b	20	95	0.002	32.2
RNAseq_56523	MIMAT0003546	Bos taurus	miR-27b	bta-miR-27b	20	95	0.002	32.2
RNAseq_56523	MIMAT0002952	Tetraodon nigroviridis	miR-27b	tni-miR-27b	20	95	0.002	32.2
RNAseq_56523	MIMAT0002951	Fugu rubripes	miR-27b	fru-miR-27b	20	95	0.002	32.2
RNAseq_56523	MIMAT0001797	Danio rerio	miR-27b	dre-miR-27b	20	95	0.002	32.2
RNAseq_56523	MIMAT0001187	Gallus gallus	miR-27b-3p	gga-miR-27b-3p	20	95	0.002	32.2
RNAseq_56523	MIMAT0000798	Rattus norvegicus	miR-27b-3p	rno-miR-27b-3p	20	95	0.002	32.2
RNAseq_56523	MIMAT0000419	Homo sapiens	miR-27b-3p	hsa-miR-27b-3p	20	95	0.002	32.2
RNAseq_56523	MIMAT0000126	Mus musculus	miR-27b-3p	mmu-miR-27b-3p	20	95	0.002	32.2
RNAseq_62621	MIMAT0024954	Heliconius melpomene	miR-276	hme-miR-276	22	100	6e-07	44.1
RNAseq_62621	MIMAT0010138	Locusta migratoria	miR-276-5p	lmi-miR-276-5p	22	100	6e-07	44.1
RNAseq_62621	MIMAT0009018	Drosophila willistoni	miR-276b-5p	dwi-miR-276b-5p	22	100	6e-07	44.1
RNAseq_62621	MIMAT0009007	Drosophila willistoni	miR-276a-5p	dwi-miR-276a-5p	22	100	6e-07	44.1
RNAseq_62621	MIMAT0008575	Drosophila grimshawi	miR-276a-5p	dgr-miR-276a-5p	22	100	6e-07	44.1
RNAseq_62621	MIMAT0008573	Drosophila grimshawi	miR-276b-5p	dgr-miR-276b-5p	22	100	6e-07	44.1
RNAseq_62621	MIMAT0008380	Tribolium castaneum	miR-276-5p	tca-miR-276-5p	22	100	6e-07	44.1
RNAseq_62621	MIMAT0004202	Bombyx mori	miR-276-5p	bmo-miR-276-5p	22	100	6e-07	44.1
RNAseq_62621	MIMAT0020815	Drosophila melanogaster	miR-276b-5p	dme-miR-276b-5p	22	100	6e-07	44.1
RNAseq_62621	MIMAT0000336	Drosophila melanogaster	miR-276a-5p	dme-miR-276a-5p	22	100	6e-07	44.1
RNAseq_62621	MIMAT0014222	Aedes aegypti	miR-276-5p	aae-miR-276-5p	21	100	2e-06	42.1
RNAseq_62621	MIMAT0001509	Anopheles gambiae	miR-276-5p	aga-miR-276-5p	20	100	9e-06	40.1
RNAseq_64436	MIMAT0024239	Gorilla gorilla	miR-589	ggo-miR-589	21	100	2e-06	42.1
RNAseq_64436	MIMAT0016031	Pongo pygmaeus	miR-589	ppy-miR-589	21	100	2e-06	42.1
RNAseq_64436	MIMAT0006449	Macaca mulatta	miR-589	mml-miR-589	21	100	2e-06	42.1
RNAseq_64436	MIMAT0004799	Homo sapiens	miR-589-5p	hsa-miR-589-5p	21	100	2e-06	42.1
RNAseq_64436	MIMAT0012806	Pan troglodytes	miR-589	ptr-miR-589	21	95.24	0.0006	34.2
RNAseq_66270	MIMAT0030051	Ovis aries	miR-26a	oar-miR-26a	22	100	6e-07	44.1
RNAseq_66270	MIMAT0029485	Ictalurus punctatus	miR-26a	ipu-miR-26a	22	100	6e-07	44.1
RNAseq_66270	MIMAT0026281	Cyprinus carpio	miR-26a	ccr-miR-26a	22	100	6e-07	44.1
RNAseq_66270	MIMAT0019408	Petromyzon marinus	miR-26a-5p	pma-miR-26a-5p	22	100	6e-07	44.1
RNAseq_66270	MIMAT0016938	Bos taurus	miR-26c	bta-miR-26c	22	100	6e-07	44.1
RNAseq_66270	MIMAT0014516	Taeniopygia guttata	miR-26-5p	tgu-miR-26-5p	22	100	6e-07	44.1
RNAseq_66270	MIMAT0012975	Equus caballus	miR-26a	eca-miR-26a	22	100	6e-07	44.1
RNAseq_66270	MIMAT0006595	Canis familiaris	miR-26a	cfa-miR-26a	22	100	6e-07	44.1
RNAseq_66270	MIMAT0006991	Ornithorhynchus anatinus	miR-26-5p	oan-miR-26-5p	22	100	6e-07	44.1
RNAseq_66270	MIMAT0003516	Bos taurus	miR-26a	bta-miR-26a	22	100	6e-07	44.1
RNAseq_66270	MIMAT0003038	Tetraodon nigroviridis	miR-26	tni-miR-26	22	100	6e-07	44.1
RNAseq_66270	MIMAT0003037	Fugu rubripes	miR-26	fru-miR-26	22	100	6e-07	44.1
RNAseq_66270	MIMAT0002350	Pan paniscus	miR-26a	ppa-miR-26a	22	100	6e-07	44.1
RNAseq_66270	MIMAT0002349	Macaca mulatta	miR-26a-5p	mml-miR-26a-5p	22	100	6e-07	44.1
RNAseq_66270	MIMAT0002348	Macaca nemestrina	miR-26a	mne-miR-26a	22	100	6e-07	44.1
RNAseq_66270	MIMAT0002347	Lagothrix lagotricha	miR-26a	lla-miR-26a	22	100	6e-07	44.1
RNAseq_66270	MIMAT0002346	Pongo pygmaeus	miR-26a	ppy-miR-26a	22	100	6e-07	44.1
RNAseq_66270	MIMAT0002345	Gorilla gorilla	miR-26a	ggo-miR-26a	22	100	6e-07	44.1
RNAseq_66270	MIMAT0002344	Pan troglodytes	miR-26a	ptr-miR-26a	22	100	6e-07	44.1
RNAseq_66270	MIMAT0002135	Sus scrofa	miR-26a	ssc-miR-26a	22	100	6e-07	44.1
RNAseq_66270	MIMAT0001794	Danio rerio	miR-26a	dre-miR-26a	22	100	6e-07	44.1
RNAseq_66270	MIMAT0000796	Rattus norvegicus	miR-26a-5p	rno-miR-26a-5p	22	100	6e-07	44.1
RNAseq_66270	MIMAT0000533	Mus musculus	miR-26a-5p	mmu-miR-26a-5p	22	100	6e-07	44.1
RNAseq_66270	MIMAT0000082	Homo sapiens	miR-26a-5p	hsa-miR-26a-5p	22	100	6e-07	44.1
RNAseq_66270	MIMAT0030361	Hippoglossus hippoglossus	miR-26	hhi-miR-26	21	100	2e-06	42.1
RNAseq_66270	MIMAT0022575	Oryzias latipes	miR-26	ola-miR-26	21	100	2e-06	42.1
RNAseq_66270	MIMAT0012736	Monodelphis domestica	miR-26-5p	mdo-miR-26-5p	21	100	2e-06	42.1
RNAseq_66270	MIMAT0003569	Xenopus tropicalis	miR-26	xtr-miR-26	21	100	2e-06	42.1
RNAseq_66270	MIMAT0001118	Gallus gallus	miR-26a-5p	gga-miR-26a-5p	21	100	2e-06	42.1
RNAseq_66270	MIMAT0029486	Ictalurus punctatus	miR-26b	ipu-miR-26b	20	100	9e-06	40.1
RNAseq_66270	MIMAT0023871	Cricetulus griseus	miR-26a	cgr-miR-26a	20	100	9e-06	40.1
RNAseq_66270	MIMAT0021902	Anolis carolinensis	miR-26-5p	aca-miR-26-5p	20	100	9e-06	40.1
RNAseq_66270	MIMAT0019411	Petromyzon marinus	miR-26b-5p	pma-miR-26b-5p	20	100	9e-06	40.1
RNAseq_66270	MIMAT0001795	Danio rerio	miR-26b	dre-miR-26b	20	100	9e-06	40.1
RNAseq_66910	MIMAT0022962	Sus scrofa	miR-421-3p	ssc-miR-421-3p	23	100	2e-07	46.1
RNAseq_66910	MIMAT0015880	Pongo pygmaeus	miR-421	ppy-miR-421	23	100	2e-07	46.1
RNAseq_66910	MIMAT0009314	Bos taurus	miR-421	bta-miR-421	23	100	2e-07	46.1
RNAseq_66910	MIMAT0008140	Pan troglodytes	miR-421	ptr-miR-421	23	100	2e-07	46.1
RNAseq_66910	MIMAT0006319	Macaca mulatta	miR-421	mml-miR-421	23	100	2e-07	46.1
RNAseq_66910	MIMAT0004869	Mus musculus	miR-421-3p	mmu-miR-421-3p	23	100	2e-07	46.1
RNAseq_66910	MIMAT0003339	Homo sapiens	miR-421	hsa-miR-421	23	100	2e-07	46.1
RNAseq_66910	MIMAT0024168	Gorilla gorilla	miR-421	ggo-miR-421	22	100	6e-07	44.1
RNAseq_66910	MIMAT0006755	Canis familiaris	miR-421	cfa-miR-421	22	100	6e-07	44.1
RNAseq_66910	MIMAT0017175	Rattus norvegicus	miR-421-3p	rno-miR-421-3p	20	100	9e-06	40.1
RNAseq_68296	MIMAT0031600	Branchiostoma belcheri	miR-183-5p	bbe-miR-183-5p	21	95.24	0.0006	34.2
RNAseq_68296	MIMAT0030355	Hippoglossus hippoglossus	miR-183	hhi-miR-183	21	95.24	0.0006	34.2
RNAseq_68296	MIMAT0026243	Cyprinus carpio	miR-183	ccr-miR-183	21	95.24	0.0006	34.2
RNAseq_68296	MIMAT0025393	Taeniopygia guttata	miR-183	tgu-miR-183	21	95.24	0.0006	34.2
RNAseq_68296	MIMAT0019491	Petromyzon marinus	miR-183-5p	pma-miR-183-5p	21	95.24	0.0006	34.2
RNAseq_68296	MIMAT0017814	Rattus norvegicus	miR-3553	rno-miR-3553	21	95.24	0.0006	34.2
RNAseq_68296	MIMAT0015780	Pongo pygmaeus	miR-183	ppy-miR-183	21	95.24	0.0006	34.2
RNAseq_68296	MIMAT0012938	Equus caballus	miR-183	eca-miR-183	21	95.24	0.0006	34.2
RNAseq_68296	MIMAT0009487	Branchiostoma floridae	miR-183	bfl-miR-183	21	95.24	0.0006	34.2
RNAseq_68296	MIMAT0009245	Bos taurus	miR-183	bta-miR-183	21	95.24	0.0006	34.2
RNAseq_68296	MIMAT0006621	Canis familiaris	miR-183	cfa-miR-183	21	95.24	0.0006	34.2
RNAseq_68296	MIMAT0006107	Ciona intestinalis	miR-183-5p	cin-miR-183-5p	21	95.24	0.0006	34.2
RNAseq_68296	MIMAT0006805	Ornithorhynchus anatinus	miR-183	oan-miR-183	21	95.24	0.0006	34.2
RNAseq_68296	MIMAT0004146	Monodelphis domestica	miR-183-5p	mdo-miR-183-5p	21	95.24	0.0006	34.2
RNAseq_68296	MIMAT0003612	Xenopus tropicalis	miR-183	xtr-miR-183	21	95.24	0.0006	34.2
RNAseq_68296	MIMAT0003090	Tetraodon nigroviridis	miR-183	tni-miR-183	21	95.24	0.0006	34.2
RNAseq_68296	MIMAT0003089	Fugu rubripes	miR-183	fru-miR-183	21	95.24	0.0006	34.2
RNAseq_68296	MIMAT0002793	Pan paniscus	miR-183	ppa-miR-183	21	95.24	0.0006	34.2
RNAseq_68296	MIMAT0002791	Macaca nemestrina	miR-183	mne-miR-183	21	95.24	0.0006	34.2
RNAseq_68296	MIMAT0002789	Saguinus labiatus	miR-183	sla-miR-183	21	95.24	0.0006	34.2
RNAseq_68296	MIMAT0002787	Gorilla gorilla	miR-183	ggo-miR-183	21	95.24	0.0006	34.2
RNAseq_68296	MIMAT0002785	Pan troglodytes	miR-183	ptr-miR-183	21	95.24	0.0006	34.2
RNAseq_68296	MIMAT0002783	Macaca mulatta	miR-183-5p	mml-miR-183-5p	21	95.24	0.0006	34.2
RNAseq_68296	MIMAT0002145	Sus scrofa	miR-183	ssc-miR-183	21	95.24	0.0006	34.2
RNAseq_68296	MIMAT0001273	Danio rerio	miR-183	dre-miR-183	21	95.24	0.0006	34.2
RNAseq_68296	MIMAT0001191	Gallus gallus	miR-183	gga-miR-183	21	95.24	0.0006	34.2
RNAseq_68296	MIMAT0000860	Rattus norvegicus	miR-183-5p	rno-miR-183-5p	21	95.24	0.0006	34.2
RNAseq_68296	MIMAT0000261	Homo sapiens	miR-183-5p	hsa-miR-183-5p	21	95.24	0.0006	34.2
RNAseq_68296	MIMAT0000212	Mus musculus	miR-183-5p	mmu-miR-183-5p	21	95.24	0.0006	34.2
RNAseq_70650	MIMAT0010115	Apis mellifera	miR-996	ame-miR-996	21	95.24	0.0006	34.2
RNAseq_80738	MIMAT0013883	Sus scrofa	miR-151-3p	ssc-miR-151-3p	22	100	6e-07	44.1
RNAseq_80738	MIMAT0015776	Pongo pygmaeus	miR-151a-3p	ppy-miR-151a-3p	21	100	2e-06	42.1
RNAseq_80738	MIMAT0008045	Pan troglodytes	miR-151	ptr-miR-151	21	100	2e-06	42.1
RNAseq_80738	MIMAT0006213	Macaca mulatta	miR-151-3p	mml-miR-151-3p	21	100	2e-06	42.1
RNAseq_80738	MIMAT0003524	Bos taurus	miR-151-3p	bta-miR-151-3p	21	100	2e-06	42.1
RNAseq_80738	MIMAT0000757	Homo sapiens	miR-151a-3p	hsa-miR-151a-3p	21	100	2e-06	42.1
RNAseq_80738	MIMAT0023783	Cricetulus griseus	miR-151-3p	cgr-miR-151-3p	21	95.24	0.0006	34.2
RNAseq_80738	MIMAT0000614	Rattus norvegicus	miR-151-3p	rno-miR-151-3p	21	95.24	0.0006	34.2
RNAseq_80738	MIMAT0000161	Mus musculus	miR-151-3p	mmu-miR-151-3p	21	95.24	0.0006	34.2
RNAseq_82175	MIMAT0030023	Ovis aries	let-7d	oar-let-7d	20	100	9e-06	40.1
RNAseq_86870	MIMAT0024439	Manduca sexta	miR-193	mse-miR-193	22	95.45	0.0001	36.2
RNAseq_86870	MIMAT0020539	Heliconius melpomene	miR-193-3p	hme-miR-193-3p	22	95.45	0.0001	36.2
RNAseq_86870	MIMAT0018508	Apis mellifera	miR-193	ame-miR-193	21	95.24	0.0006	34.2
RNAseq_86870	MIMAT0012643	Daphnia pulex	miR-193	dpu-miR-193	21	95.24	0.0006	34.2
RNAseq_86870	MIMAT0018897	Tribolium castaneum	miR-193-3p	tca-miR-193-3p	22	90.91	0.035	28.2
RNAseq_91394	MIMAT0023859	Cricetulus griseus	miR-221-3p	cgr-miR-221-3p	23	100	2e-07	46.1
RNAseq_91394	MIMAT0022530	Oryzias latipes	miR-221	ola-miR-221	23	100	2e-07	46.1
RNAseq_91394	MIMAT0014512	Taeniopygia guttata	miR-221-3p	tgu-miR-221-3p	23	100	2e-07	46.1
RNAseq_91394	MIMAT0013203	Equus caballus	miR-221	eca-miR-221	23	100	2e-07	46.1
RNAseq_91394	MIMAT0008076	Pan troglodytes	miR-221	ptr-miR-221	23	100	2e-07	46.1
RNAseq_91394	MIMAT0004160	Monodelphis domestica	miR-221-3p	mdo-miR-221-3p	23	100	2e-07	46.1
RNAseq_91394	MIMAT0003700	Xenopus tropicalis	miR-221	xtr-miR-221	23	100	2e-07	46.1
RNAseq_91394	MIMAT0002907	Tetraodon nigroviridis	miR-221	tni-miR-221	23	100	2e-07	46.1
RNAseq_91394	MIMAT0002906	Fugu rubripes	miR-221	fru-miR-221	23	100	2e-07	46.1
RNAseq_91394	MIMAT0002586	Pan paniscus	miR-221	ppa-miR-221	23	100	2e-07	46.1
RNAseq_91394	MIMAT0002585	Pongo pygmaeus	miR-221	ppy-miR-221	23	100	2e-07	46.1
RNAseq_91394	MIMAT0002584	Gorilla gorilla	miR-221	ggo-miR-221	23	100	2e-07	46.1
RNAseq_91394	MIMAT0002583	Macaca mulatta	miR-221-3p	mml-miR-221-3p	23	100	2e-07	46.1
RNAseq_91394	MIMAT0001288	Danio rerio	miR-221	dre-miR-221	23	100	2e-07	46.1
RNAseq_91394	MIMAT0001108	Gallus gallus	miR-221-3p	gga-miR-221-3p	23	100	2e-07	46.1
RNAseq_91394	MIMAT0000890	Rattus norvegicus	miR-221-3p	rno-miR-221-3p	23	100	2e-07	46.1
RNAseq_91394	MIMAT0000669	Mus musculus	miR-221-3p	mmu-miR-221-3p	23	100	2e-07	46.1
RNAseq_91394	MIMAT0000278	Homo sapiens	miR-221-3p	hsa-miR-221-3p	23	100	2e-07	46.1
RNAseq_91394	MIMAT0030047	Ovis aries	miR-221	oar-miR-221	22	100	6e-07	44.1
RNAseq_91394	MIMAT0029476	Ictalurus punctatus	miR-221	ipu-miR-221	22	100	6e-07	44.1
RNAseq_91394	MIMAT0025449	Paralichthys olivaceus	miR-221-3p	pol-miR-221-3p	22	100	6e-07	44.1
RNAseq_91394	MIMAT0021890	Anolis carolinensis	miR-221-3p	aca-miR-221-3p	22	100	6e-07	44.1
RNAseq_91394	MIMAT0007762	Sus scrofa	miR-221-3p	ssc-miR-221-3p	22	100	6e-07	44.1
RNAseq_91394	MIMAT0006757	Canis familiaris	miR-221	cfa-miR-221	22	100	6e-07	44.1
RNAseq_91394	MIMAT0007135	Ornithorhynchus anatinus	miR-221-3p	oan-miR-221-3p	22	100	6e-07	44.1
RNAseq_91394	MIMAT0003529	Bos taurus	miR-221	bta-miR-221	22	100	6e-07	44.1
RNAseq_91394	MIMAT0022797	Sarcophilus harrisii	miR-221	sha-miR-221	21	100	2e-06	42.1
RNAseq_91394	MIMAT0019532	Petromyzon marinus	miR-221	pma-miR-221	21	100	2e-06	42.1
RNAseq_91577	MIMAT0024446	Manduca sexta	miR-281	mse-miR-281	21	100	2e-06	42.1
RNAseq_91577	MIMAT0023047	Tetranychus urticae	miR-281-3p	tur-miR-281-3p	21	100	2e-06	42.1
RNAseq_91577	MIMAT0014134	Acyrthosiphon pisum	miR-281	api-miR-281	21	100	2e-06	42.1
RNAseq_91577	MIMAT0008385	Tribolium castaneum	miR-281-3p	tca-miR-281-3p	21	100	2e-06	42.1
RNAseq_91577	MIMAT0030509	Panagrellus redivivus	miR-46-3p	prd-miR-46-3p	20	100	9e-06	40.1
RNAseq_91577	MIMAT0024967	Heliconius melpomene	miR-281	hme-miR-281	20	100	9e-06	40.1
RNAseq_91577	MIMAT0019535	Petromyzon marinus	miR-281a	pma-miR-281a	20	100	9e-06	40.1
RNAseq_91577	MIMAT0009641	Saccoglossus kowalevskii	miR-281	sko-miR-281	20	100	9e-06	40.1
RNAseq_91577	MIMAT0007905	Bombyx mori	miR-281-3p	bmo-miR-281-3p	20	100	9e-06	40.1
RNAseq_91577	MIMAT0006114	Ciona intestinalis	miR-281-3p	cin-miR-281-3p	20	100	9e-06	40.1
RNAseq_91577	MIMAT0014359	Culex quinquefasciatus	miR-281-3p	cqu-miR-281-3p	21	95.24	0.0006	34.2
RNAseq_91577	MIMAT0029743	Caenorhabditis brenneri	miR-46	cbn-miR-46	20	95	0.002	32.2
RNAseq_91577	MIMAT0023327	Haemonchus contortus	miR-46	hco-miR-46	20	95	0.002	32.2
RNAseq_91577	MIMAT0011655	Pristionchus pacificus	miR-46	ppc-miR-46	20	95	0.002	32.2
RNAseq_91577	MIMAT0011598	Caenorhabditis remanei	miR-46-3p	crm-miR-46-3p	20	95	0.002	32.2
RNAseq_91577	MIMAT0000471	Caenorhabditis briggsae	miR-46	cbr-miR-46	20	95	0.002	32.2
RNAseq_91577	MIMAT0000017	Caenorhabditis elegans	miR-46-3p	cel-miR-46-3p	20	95	0.002	32.2
RNAseq_91727	MIMAT0015797	Pongo pygmaeus	miR-203	ppy-miR-203	21	100	2e-06	42.1
RNAseq_91727	MIMAT0009866	Canis familiaris	miR-203	cfa-miR-203	21	100	2e-06	42.1
RNAseq_91727	MIMAT0008065	Pan troglodytes	miR-203	ptr-miR-203	21	100	2e-06	42.1
RNAseq_91727	MIMAT0006234	Macaca mulatta	miR-203	mml-miR-203	21	100	2e-06	42.1
RNAseq_91727	MIMAT0000876	Rattus norvegicus	miR-203a-3p	rno-miR-203a-3p	21	100	2e-06	42.1
RNAseq_91727	MIMAT0000264	Homo sapiens	miR-203a	hsa-miR-203a	21	100	2e-06	42.1
RNAseq_91727	MIMAT0000236	Mus musculus	miR-203-3p	mmu-miR-203-3p	21	100	2e-06	42.1
RNAseq_91727	MIMAT0019813	Homo sapiens	miR-203b-5p	hsa-miR-203b-5p	20	100	9e-06	40.1
RNAseq_93937	MIMAT0029440	Ictalurus punctatus	miR-183	ipu-miR-183	21	100	2e-06	42.1
RNAseq_93937	MIMAT0023806	Cricetulus griseus	miR-183	cgr-miR-183	21	100	2e-06	42.1
RNAseq_97875	MIMAT0021503	Ascaris suum	miR-228-5p	asu-miR-228-5p	23	91.3	0.009	30.2
RNAseq_97875	MIMAT0014120	Brugia malayi	miR-228	bma-miR-228	23	91.3	0.009	30.2
RNAseq_98632	MIMAT0019092	Tribolium castaneum	miR-1-5p	tca-miR-1-5p	21	100	2e-06	42.1
RNAseq_98632	MIMAT0015222	Bombyx mori	miR-1a-5p	bmo-miR-1a-5p	20	100	9e-06	40.1
RNAseq_98839	MIMAT0023069	Tetranychus urticae	miR-307-3p	tur-miR-307-3p	21	100	2e-06	42.1
RNAseq_98839	MIMAT0021524	Ascaris suum	miR-67-3p	asu-miR-67-3p	21	100	2e-06	42.1
RNAseq_98839	MIMAT0024448	Manduca sexta	miR-307	mse-miR-307	20	100	9e-06	40.1
RNAseq_98839	MIMAT0012701	Ixodes scapularis	miR-307	isc-miR-307	20	100	9e-06	40.1
RNAseq_98839	MIMAT0012665	Daphnia pulex	miR-307	dpu-miR-307	20	100	9e-06	40.1
RNAseq_98839	MIMAT0010137	Locusta migratoria	miR-307-3p	lmi-miR-307-3p	20	100	9e-06	40.1
RNAseq_98839	MIMAT0009054	Drosophila yakuba	miR-307	dya-miR-307	20	100	9e-06	40.1
RNAseq_98839	MIMAT0009031	Drosophila willistoni	miR-307	dwi-miR-307	20	100	9e-06	40.1
RNAseq_98839	MIMAT0008953	Drosophila virilis	miR-307	dvi-miR-307	20	100	9e-06	40.1
RNAseq_98839	MIMAT0008884	Drosophila simulans	miR-307	dsi-miR-307	20	100	9e-06	40.1
RNAseq_98839	MIMAT0008811	Drosophila sechellia	miR-307	dse-miR-307	20	100	9e-06	40.1
RNAseq_98839	MIMAT0008697	Drosophila persimilis	miR-307	dpe-miR-307	20	100	9e-06	40.1
RNAseq_98839	MIMAT0008665	Drosophila mojavensis	miR-307	dmo-miR-307	20	100	9e-06	40.1
RNAseq_98839	MIMAT0008562	Drosophila grimshawi	miR-307	dgr-miR-307	20	100	9e-06	40.1
RNAseq_98839	MIMAT0008497	Drosophila erecta	miR-307	der-miR-307	20	100	9e-06	40.1
RNAseq_98839	MIMAT0008434	Drosophila ananassae	miR-307	dan-miR-307	20	100	9e-06	40.1
RNAseq_98839	MIMAT0008389	Tribolium castaneum	miR-307-3p	tca-miR-307-3p	20	100	9e-06	40.1
RNAseq_98839	MIMAT0004208	Bombyx mori	miR-307-3p	bmo-miR-307-3p	20	100	9e-06	40.1
RNAseq_98839	MIMAT0001519	Anopheles gambiae	miR-307	aga-miR-307	20	100	9e-06	40.1
RNAseq_98839	MIMAT0001257	Drosophila pseudoobscura	miR-307a	dps-miR-307a	20	100	9e-06	40.1
RNAseq_98839	MIMAT0000398	Drosophila melanogaster	miR-307a-3p	dme-miR-307a-3p	20	100	9e-06	40.1
RNAseq_99050	MIMAT0012077	Bos taurus	miR-2484	bta-miR-2484	23	95.65	4e-05	38.2
RNAseq_100356	MIMAT0018418	Nasonia longicornis	miR-282	nlo-miR-282	22	100	6e-07	44.1
RNAseq_100356	MIMAT0015693	Nasonia vitripennis	miR-282	nvi-miR-282	22	100	6e-07	44.1
RNAseq_100356	MIMAT0014311	Aedes aegypti	miR-282-5p	aae-miR-282-5p	22	100	6e-07	44.1
RNAseq_100356	MIMAT0008386	Tribolium castaneum	miR-282-5p	tca-miR-282-5p	22	100	6e-07	44.1
RNAseq_100356	MIMAT0001484	Apis mellifera	miR-282	ame-miR-282	22	100	6e-07	44.1
RNAseq_100356	MIMAT0024968	Heliconius melpomene	miR-282	hme-miR-282	22	95.45	0.0001	36.2
RNAseq_100356	MIMAT0024444	Manduca sexta	miR-282	mse-miR-282	22	95.45	0.0001	36.2
RNAseq_100356	MIMAT0009071	Drosophila yakuba	miR-282	dya-miR-282	22	95.45	0.0001	36.2
RNAseq_100356	MIMAT0009026	Drosophila willistoni	miR-282	dwi-miR-282	22	95.45	0.0001	36.2
RNAseq_100356	MIMAT0008932	Drosophila virilis	miR-282	dvi-miR-282	22	95.45	0.0001	36.2
RNAseq_100356	MIMAT0008883	Drosophila simulans	miR-282	dsi-miR-282	22	95.45	0.0001	36.2
RNAseq_100356	MIMAT0008792	Drosophila sechellia	miR-282	dse-miR-282	22	95.45	0.0001	36.2
RNAseq_100356	MIMAT0008716	Drosophila persimilis	miR-282	dpe-miR-282	22	95.45	0.0001	36.2
RNAseq_100356	MIMAT0008645	Drosophila mojavensis	miR-282	dmo-miR-282	22	95.45	0.0001	36.2
RNAseq_100356	MIMAT0008614	Drosophila grimshawi	miR-282	dgr-miR-282	22	95.45	0.0001	36.2
RNAseq_100356	MIMAT0008509	Drosophila erecta	miR-282	der-miR-282	22	95.45	0.0001	36.2
RNAseq_100356	MIMAT0008445	Drosophila ananassae	miR-282	dan-miR-282	22	95.45	0.0001	36.2
RNAseq_100356	MIMAT0004205	Bombyx mori	miR-282-5p	bmo-miR-282-5p	22	95.45	0.0001	36.2
RNAseq_100356	MIMAT0001514	Anopheles gambiae	miR-282	aga-miR-282	22	95.45	0.0001	36.2
RNAseq_100356	MIMAT0001246	Drosophila pseudoobscura	miR-282	dps-miR-282	22	95.45	0.0001	36.2
RNAseq_100356	MIMAT0000346	Drosophila melanogaster	miR-282-5p	dme-miR-282-5p	22	95.45	0.0001	36.2
RNAseq_127191	MIMAT0030025	Ovis aries	let-7g	oar-let-7g	20	100	9e-06	40.1
RNAseq_127191	MIMAT0024076	Gorilla gorilla	let-7g	ggo-let-7g	20	100	9e-06	40.1
RNAseq_127191	MIMAT0022794	Sarcophilus harrisii	let-7g	sha-let-7g	20	100	9e-06	40.1
RNAseq_127191	MIMAT0004142	Monodelphis domestica	let-7g-5p	mdo-let-7g-5p	20	100	9e-06	40.1
RNAseq_127191	MIMAT0001160	Gallus gallus	let-7g-5p	gga-let-7g-5p	20	100	9e-06	40.1
RNAseq_129990	MIMAT0029388	Ictalurus punctatus	miR-103	ipu-miR-103	23	100	2e-07	46.1
RNAseq_129990	MIMAT0026198	Cyprinus carpio	miR-103	ccr-miR-103	23	100	2e-07	46.1
RNAseq_129990	MIMAT0023731	Cricetulus griseus	miR-103-3p	cgr-miR-103-3p	23	100	2e-07	46.1
RNAseq_129990	MIMAT0019443	Petromyzon marinus	miR-103b-3p	pma-miR-103b-3p	23	100	2e-07	46.1
RNAseq_129990	MIMAT0014523	Taeniopygia guttata	miR-103-3p	tgu-miR-103-3p	23	100	2e-07	46.1
RNAseq_129990	MIMAT0013105	Equus caballus	miR-103	eca-miR-103	23	100	2e-07	46.1
RNAseq_129990	MIMAT0013061	Equus caballus	miR-107a	eca-miR-107a	23	100	2e-07	46.1
RNAseq_129990	MIMAT0006687	Canis familiaris	miR-103	cfa-miR-103	23	100	2e-07	46.1
RNAseq_129990	MIMAT0007402	Homo sapiens	miR-103b	hsa-miR-103b	23	100	2e-07	46.1
RNAseq_129990	MIMAT0006942	Ornithorhynchus anatinus	miR-103-3p	oan-miR-103-3p	23	100	2e-07	46.1
RNAseq_129990	MIMAT0004099	Monodelphis domestica	miR-103-3p	mdo-miR-103-3p	23	100	2e-07	46.1
RNAseq_129990	MIMAT0003663	Xenopus tropicalis	miR-103	xtr-miR-103	23	100	2e-07	46.1
RNAseq_129990	MIMAT0003521	Bos taurus	miR-103	bta-miR-103	23	100	2e-07	46.1
RNAseq_129990	MIMAT0003042	Tetraodon nigroviridis	miR-103	tni-miR-103	23	100	2e-07	46.1
RNAseq_129990	MIMAT0003041	Fugu rubripes	miR-103	fru-miR-103	23	100	2e-07	46.1
RNAseq_129990	MIMAT0002449	Macaca nemestrina	miR-103	mne-miR-103	23	100	2e-07	46.1
RNAseq_129990	MIMAT0002448	Lagothrix lagotricha	miR-103	lla-miR-103	23	100	2e-07	46.1
RNAseq_129990	MIMAT0002447	Macaca mulatta	miR-103-3p	mml-miR-103-3p	23	100	2e-07	46.1
RNAseq_129990	MIMAT0002446	Pan troglodytes	miR-103	ptr-miR-103	23	100	2e-07	46.1
RNAseq_129990	MIMAT0002445	Pongo pygmaeus	miR-103	ppy-miR-103	23	100	2e-07	46.1
RNAseq_129990	MIMAT0002444	Pan paniscus	miR-103	ppa-miR-103	23	100	2e-07	46.1
RNAseq_129990	MIMAT0002443	Gorilla gorilla	miR-103	ggo-miR-103	23	100	2e-07	46.1
RNAseq_129990	MIMAT0002442	Ateles geoffroyi	miR-103	age-miR-103	23	100	2e-07	46.1
RNAseq_129990	MIMAT0002154	Sus scrofa	miR-103	ssc-miR-103	23	100	2e-07	46.1
RNAseq_129990	MIMAT0001816	Danio rerio	miR-103	dre-miR-103	23	100	2e-07	46.1
RNAseq_129990	MIMAT0001145	Gallus gallus	miR-103-3p	gga-miR-103-3p	23	100	2e-07	46.1
RNAseq_129990	MIMAT0000824	Rattus norvegicus	miR-103-3p	rno-miR-103-3p	23	100	2e-07	46.1
RNAseq_129990	MIMAT0000546	Mus musculus	miR-103-3p	mmu-miR-103-3p	23	100	2e-07	46.1
RNAseq_129990	MIMAT0000101	Homo sapiens	miR-103a-3p	hsa-miR-103a-3p	23	100	2e-07	46.1
RNAseq_129990	MIMAT0030027	Ovis aries	miR-103	oar-miR-103	22	100	6e-07	44.1
RNAseq_129990	MIMAT0021716	Anolis carolinensis	miR-103-3p	aca-miR-103-3p	22	100	6e-07	44.1
RNAseq_129990	MIMAT0030029	Ovis aries	miR-107	oar-miR-107	21	100	2e-06	42.1
RNAseq_129990	MIMAT0029389	Ictalurus punctatus	miR-107a	ipu-miR-107a	21	100	2e-06	42.1
RNAseq_129990	MIMAT0026199	Cyprinus carpio	miR-107	ccr-miR-107	21	100	2e-06	42.1
RNAseq_129990	MIMAT0023734	Cricetulus griseus	miR-107	cgr-miR-107	21	100	2e-06	42.1
RNAseq_129990	MIMAT0022632	Oryzias latipes	miR-107	ola-miR-107	21	100	2e-06	42.1
RNAseq_129990	MIMAT0022593	Oryzias latipes	miR-103	ola-miR-103	21	100	2e-06	42.1
RNAseq_129990	MIMAT0021714	Anolis carolinensis	miR-107-3p	aca-miR-107-3p	21	100	2e-06	42.1
RNAseq_129990	MIMAT0014556	Taeniopygia guttata	miR-107	tgu-miR-107	21	100	2e-06	42.1
RNAseq_129990	MIMAT0012886	Equus caballus	miR-107b	eca-miR-107b	21	100	2e-06	42.1
RNAseq_129990	MIMAT0006666	Canis familiaris	miR-107	cfa-miR-107	21	100	2e-06	42.1
RNAseq_129990	MIMAT0007119	Ornithorhynchus anatinus	miR-107-3p	oan-miR-107-3p	21	100	2e-06	42.1
RNAseq_129990	MIMAT0004100	Monodelphis domestica	miR-107	mdo-miR-107	21	100	2e-06	42.1
RNAseq_129990	MIMAT0003785	Bos taurus	miR-107	bta-miR-107	21	100	2e-06	42.1
RNAseq_129990	MIMAT0003584	Xenopus tropicalis	miR-107	xtr-miR-107	21	100	2e-06	42.1
RNAseq_129990	MIMAT0003044	Tetraodon nigroviridis	miR-107	tni-miR-107	21	100	2e-06	42.1
RNAseq_129990	MIMAT0003043	Fugu rubripes	miR-107	fru-miR-107	21	100	2e-06	42.1
RNAseq_129990	MIMAT0002464	Pan paniscus	miR-107	ppa-miR-107	21	100	2e-06	42.1
RNAseq_129990	MIMAT0002463	Macaca nemestrina	miR-107	mne-miR-107	21	100	2e-06	42.1
RNAseq_129990	MIMAT0002462	Lagothrix lagotricha	miR-107	lla-miR-107	21	100	2e-06	42.1
RNAseq_129990	MIMAT0002461	Pongo pygmaeus	miR-107	ppy-miR-107	21	100	2e-06	42.1
RNAseq_129990	MIMAT0002460	Gorilla gorilla	miR-107	ggo-miR-107	21	100	2e-06	42.1
RNAseq_129990	MIMAT0002459	Pan troglodytes	miR-107	ptr-miR-107	21	100	2e-06	42.1
RNAseq_129990	MIMAT0002458	Macaca mulatta	miR-107-3p	mml-miR-107-3p	21	100	2e-06	42.1
RNAseq_129990	MIMAT0002155	Sus scrofa	miR-107	ssc-miR-107	21	100	2e-06	42.1
RNAseq_129990	MIMAT0001817	Danio rerio	miR-107a	dre-miR-107a	21	100	2e-06	42.1
RNAseq_129990	MIMAT0001147	Gallus gallus	miR-107-3p	gga-miR-107-3p	21	100	2e-06	42.1
RNAseq_129990	MIMAT0000826	Rattus norvegicus	miR-107-3p	rno-miR-107-3p	21	100	2e-06	42.1
RNAseq_129990	MIMAT0000647	Mus musculus	miR-107-3p	mmu-miR-107-3p	21	100	2e-06	42.1
RNAseq_129990	MIMAT0000104	Homo sapiens	miR-107	hsa-miR-107	21	100	2e-06	42.1
RNAseq_138899	MIMAT0003589	Xenopus tropicalis	miR-128	xtr-miR-128	22	100	6e-07	44.1
RNAseq_138899	MIMAT0003019	Tetraodon nigroviridis	miR-128	tni-miR-128	22	100	6e-07	44.1
RNAseq_138899	MIMAT0003018	Fugu rubripes	miR-128	fru-miR-128	22	100	6e-07	44.1
RNAseq_138899	MIMAT0002234	Pan paniscus	miR-128	ppa-miR-128	22	100	6e-07	44.1
RNAseq_138899	MIMAT0002233	Ateles geoffroyi	miR-128	age-miR-128	22	100	6e-07	44.1
RNAseq_138899	MIMAT0002232	Saguinus labiatus	miR-128	sla-miR-128	22	100	6e-07	44.1
RNAseq_138899	MIMAT0002229	Macaca mulatta	miR-128a-3p	mml-miR-128a-3p	22	100	6e-07	44.1
RNAseq_138899	MIMAT0001824	Danio rerio	miR-128	dre-miR-128	22	100	6e-07	44.1
RNAseq_138899	MIMAT0029402	Ictalurus punctatus	miR-128	ipu-miR-128	21	100	2e-06	42.1
RNAseq_138899	MIMAT0028609	Monodelphis domestica	miR-128b-3p	mdo-miR-128b-3p	21	100	2e-06	42.1
[truncated: 1,033 more rows]

## Sheet: Human Homologs
Sequence ID	MIMAT Number	Species	miRNA Family	miRNA Name	Lenght	% Identity	E-value
RNAseq_67	MIMAT0000454	Homo sapiens	miR-184	hsa-miR-184	20	100	9e-06
RNAseq_82	MIMAT0000441	Homo sapiens	miR-9-5p	hsa-miR-9-5p	22	100	6e-07
RNAseq_221	MIMAT0000098	Homo sapiens	miR-100-5p	hsa-miR-100-5p	21	100	2e-06
RNAseq_221	MIMAT0000097	Homo sapiens	miR-99a-5p	hsa-miR-99a-5p	21	95.24	0.0006
RNAseq_391	MIMAT0000253	Homo sapiens	miR-10a-5p	hsa-miR-10a-5p	22	100	6e-07
RNAseq_391	MIMAT0000254	Homo sapiens	miR-10b-5p	hsa-miR-10b-5p	22	95.45	0.0001
RNAseq_791	MIMAT0000427	Homo sapiens	miR-133a-3p	hsa-miR-133a-3p	21	100	2e-06
RNAseq_791	MIMAT0000770	Homo sapiens	miR-133b	hsa-miR-133b	20	100	9e-06
RNAseq_1344	MIMAT0022741	Homo sapiens	miR-3529-3p	hsa-miR-3529-3p	23	100	2e-07
RNAseq_1344	MIMAT0000252	Homo sapiens	miR-7-5p	hsa-miR-7-5p	23	100	2e-07
RNAseq_1787	MIMAT0000076	Homo sapiens	miR-21-5p	hsa-miR-21-5p	22	100	6e-07
RNAseq_4186	MIMAT0003218	Homo sapiens	miR-92b-3p	hsa-miR-92b-3p	20	100	9e-06
RNAseq_4186	MIMAT0000092	Homo sapiens	miR-92a-3p	hsa-miR-92a-3p	22	95.45	0.0001
RNAseq_4506	MIMAT0018967	Homo sapiens	miR-4448	hsa-miR-4448	20	95	0.002
RNAseq_4830	MIMAT0000423	Homo sapiens	miR-125b-5p	hsa-miR-125b-5p	21	100	2e-06
RNAseq_7894	MIMAT0000422	Homo sapiens	miR-124-3p	hsa-miR-124-3p	20	100	9e-06
RNAseq_8772	MIMAT0000318	Homo sapiens	miR-200b-3p	hsa-miR-200b-3p	21	100	2e-06
RNAseq_12597	MIMAT0000728	Homo sapiens	miR-375	hsa-miR-375	20	100	9e-06
RNAseq_21135	MIMAT0000416	Homo sapiens	miR-1	hsa-miR-1	21	100	2e-06
RNAseq_29097	MIMAT0000062	Homo sapiens	let-7a-5p	hsa-let-7a-5p	20	100	9e-06
RNAseq_29097	MIMAT0000067	Homo sapiens	let-7f-5p	hsa-let-7f-5p	20	95	0.002
RNAseq_29097	MIMAT0000066	Homo sapiens	let-7e-5p	hsa-let-7e-5p	20	95	0.002
RNAseq_50404	MIMAT0000759	Homo sapiens	miR-148b-3p	hsa-miR-148b-3p	22	100	6e-07
RNAseq_50404	MIMAT0000243	Homo sapiens	miR-148a-3p	hsa-miR-148a-3p	22	90.91	0.035
RNAseq_50885	MIMAT0000415	Homo sapiens	let-7i-5p	hsa-let-7i-5p	20	100	9e-06
RNAseq_51066	MIMAT0019047	Homo sapiens	miR-4510	hsa-miR-4510	22	95.45	0.0001
RNAseq_56523	MIMAT0000419	Homo sapiens	miR-27b-3p	hsa-miR-27b-3p	20	95	0.002
RNAseq_64436	MIMAT0004799	Homo sapiens	miR-589-5p	hsa-miR-589-5p	21	100	2e-06
RNAseq_66270	MIMAT0000082	Homo sapiens	miR-26a-5p	hsa-miR-26a-5p	22	100	6e-07
RNAseq_66910	MIMAT0003339	Homo sapiens	miR-421	hsa-miR-421	23	100	2e-07
RNAseq_68296	MIMAT0000261	Homo sapiens	miR-183-5p	hsa-miR-183-5p	21	95.24	0.0006
RNAseq_80738	MIMAT0000757	Homo sapiens	miR-151a-3p	hsa-miR-151a-3p	21	100	2e-06
RNAseq_91394	MIMAT0000278	Homo sapiens	miR-221-3p	hsa-miR-221-3p	23	100	2e-07
RNAseq_91727	MIMAT0000264	Homo sapiens	miR-203a	hsa-miR-203a	21	100	2e-06
RNAseq_91727	MIMAT0019813	Homo sapiens	miR-203b-5p	hsa-miR-203b-5p	20	100	9e-06
RNAseq_129990	MIMAT0007402	Homo sapiens	miR-103b	hsa-miR-103b	23	100	2e-07
RNAseq_129990	MIMAT0000101	Homo sapiens	miR-103a-3p	hsa-miR-103a-3p	23	100	2e-07
RNAseq_129990	MIMAT0000104	Homo sapiens	miR-107	hsa-miR-107	21	100	2e-06
RNAseq_138899	MIMAT0000424	Homo sapiens	miR-128-3p	hsa-miR-128-3p	21	100	2e-06
RNAseq_140021	MIMAT0000418	Homo sapiens	miR-23b-3p	hsa-miR-23b-3p	21	100	2e-06
RNAseq_140021	MIMAT0018000	Homo sapiens	miR-23c	hsa-miR-23c	21	95.24	0.0006
RNAseq_145966	MIMAT0001620	Homo sapiens	miR-200a-5p	hsa-miR-200a-5p	21	100	2e-06
RNAseq_146358	MIMAT0000096	Homo sapiens	miR-98-5p	hsa-miR-98-5p	22	95.45	0.0001
RNAseq_156210	MIMAT0000091	Homo sapiens	miR-33a-5p	hsa-miR-33a-5p	21	100	2e-06
RNAseq_166345	MIMAT0000077	Homo sapiens	miR-22-3p	hsa-miR-22-3p	22	100	6e-07
RNAseq_179246	MIMAT0000732	Homo sapiens	miR-378a-3p	hsa-miR-378a-3p	22	100	6e-07
RNAseq_179246	MIMAT0016847	Homo sapiens	miR-378c	hsa-miR-378c	20	100	9e-06
RNAseq_179246	MIMAT0019074	Homo sapiens	miR-378i	hsa-miR-378i	21	95.24	0.0006
RNAseq_179246	MIMAT0018937	Homo sapiens	miR-378g	hsa-miR-378g	20	95	0.002
RNAseq_179246	MIMAT0018932	Homo sapiens	miR-378f	hsa-miR-378f	20	95	0.002
RNAseq_179322	MIMAT0001340	Homo sapiens	miR-423-3p	hsa-miR-423-3p	22	100	6e-07
RNAseq_179322	MIMAT0015064	Homo sapiens	miR-3184-5p	hsa-miR-3184-5p	21	100	2e-06
RNAseq_184699	MIMAT0000693	Homo sapiens	miR-30e-3p	hsa-miR-30e-3p	21	100	2e-06
RNAseq_189880	MIMAT0001536	Homo sapiens	miR-429	hsa-miR-429	22	100	6e-07
RNAseq_195925	MIMAT0000682	Homo sapiens	miR-200a-3p	hsa-miR-200a-3p	22	100	6e-07
RNAseq_195925	MIMAT0000432	Homo sapiens	miR-141-3p	hsa-miR-141-3p	21	95.24	0.0006
RNAseq_243943	MIMAT0000086	Homo sapiens	miR-29a-3p	hsa-miR-29a-3p	22	100	6e-07
RNAseq_243943	MIMAT0000681	Homo sapiens	miR-29c-3p	hsa-miR-29c-3p	22	95.45	0.0001
RNAseq_253052	MIMAT0003393	Homo sapiens	miR-425-5p	hsa-miR-425-5p	23	100	2e-07
RNAseq_259850	MIMAT0000095	Homo sapiens	miR-96-5p	hsa-miR-96-5p	22	100	6e-07
RNAseq_294559	MIMAT0000267	Homo sapiens	miR-210-3p	hsa-miR-210-3p	20	100	9e-06
RNAseq_302622	MIMAT0000084	Homo sapiens	miR-27a-3p	hsa-miR-27a-3p	20	100	9e-06
RNAseq_308007	MIMAT0019738	Homo sapiens	miR-4664-3p	hsa-miR-4664-3p	22	90.91	0.035
RNAseq_327312	MIMAT0004502	Homo sapiens	miR-28-3p	hsa-miR-28-3p	22	100	6e-07
RNAseq_357206	MIMAT0000724	Homo sapiens	miR-372-3p	hsa-miR-372-3p	22	100	6e-07
RNAseq_361206	MIMAT0000069	Homo sapiens	miR-16-5p	hsa-miR-16-5p	21	100	2e-06
RNAseq_363143	MIMAT0000259	Homo sapiens	miR-182-5p	hsa-miR-182-5p	24	100	4e-08
RNAseq_374155	MIMAT0000080	Homo sapiens	miR-24-3p	hsa-miR-24-3p	22	95.45	0.0001
RNAseq_377474	MIMAT0005825	Homo sapiens	miR-1180-3p	hsa-miR-1180-3p	22	100	6e-07
RNAseq_390383	MIMAT0005951	Homo sapiens	miR-1307-3p	hsa-miR-1307-3p	21	100	2e-06
RNAseq_411092	MIMAT0000279	Homo sapiens	miR-222-3p	hsa-miR-222-3p	20	100	9e-06
RNAseq_432711	MIMAT0002888	Homo sapiens	miR-532-5p	hsa-miR-532-5p	22	100	6e-07
RNAseq_439338	MIMAT0027561	Homo sapiens	miR-6830-3p	hsa-miR-6830-3p	20	95	0.002
RNAseq_454693	MIMAT0004697	Homo sapiens	miR-151a-5p	hsa-miR-151a-5p	21	100	2e-06
RNAseq_463261	MIMAT0019208	Homo sapiens	miR-3074-5p	hsa-miR-3074-5p	20	100	9e-06
RNAseq_464226	MIMAT0023714	Homo sapiens	miR-6089	hsa-miR-6089	20	95	0.002
RNAseq_478901	MIMAT0000440	Homo sapiens	miR-191-5p	hsa-miR-191-5p	20	100	9e-06
RNAseq_490781	MIMAT0000081	Homo sapiens	miR-25-3p	hsa-miR-25-3p	22	100	6e-07
RNAseq_550229	MIMAT0000090	Homo sapiens	miR-32-5p	hsa-miR-32-5p	22	100	6e-07
RNAseq_576130	MIMAT0000226	Homo sapiens	miR-196a-5p	hsa-miR-196a-5p	21	100	2e-06
RNAseq_593956	MIMAT0000510	Homo sapiens	miR-320a	hsa-miR-320a	22	100	6e-07
RNAseq_593956	MIMAT0005792	Homo sapiens	miR-320b	hsa-miR-320b	20	100	9e-06
RNAseq_596886	MIMAT0000438	Homo sapiens	miR-152-3p	hsa-miR-152-3p	20	100	9e-06
RNAseq_628538	MIMAT0005920	Homo sapiens	miR-1266-5p	hsa-miR-1266-5p	20	95	0.002
RNAseq_633763	MIMAT0005914	Homo sapiens	miR-1262	hsa-miR-1262	21	100	2e-06
RNAseq_636920	MIMAT0000075	Homo sapiens	miR-20a-5p	hsa-miR-20a-5p	23	100	2e-07
RNAseq_636920	MIMAT0001413	Homo sapiens	miR-20b-5p	hsa-miR-20b-5p	22	95.45	0.0001
RNAseq_636920	MIMAT0000103	Homo sapiens	miR-106a-5p	hsa-miR-106a-5p	22	95.45	0.0001
RNAseq_636920	MIMAT0000070	Homo sapiens	miR-17-5p	hsa-miR-17-5p	22	95.45	0.0001
RNAseq_641358	MIMAT0004672	Homo sapiens	miR-106b-3p	hsa-miR-106b-3p	21	100	2e-06
RNAseq_682795	MIMAT0000456	Homo sapiens	miR-186-5p	hsa-miR-186-5p	21	100	2e-06
RNAseq_684936	MIMAT0000093	Homo sapiens	miR-93-5p	hsa-miR-93-5p	23	100	2e-07
RNAseq_685248	MIMAT0000222	Homo sapiens	miR-192-5p	hsa-miR-192-5p	21	100	2e-06
RNAseq_704060	MIMAT0002871	Homo sapiens	miR-500a-3p	hsa-miR-500a-3p	22	100	6e-07
RNAseq_704060	MIMAT0004775	Homo sapiens	miR-502-3p	hsa-miR-502-3p	20	100	9e-06
RNAseq_704060	MIMAT0004774	Homo sapiens	miR-501-3p	hsa-miR-501-3p	21	95.24	0.0006
RNAseq_723768	MIMAT0000460	Homo sapiens	miR-194-5p	hsa-miR-194-5p	22	90.91	0.035
RNAseq_724251	MIMAT0004801	Homo sapiens	miR-590-3p	hsa-miR-590-3p	21	100	2e-06
RNAseq_732992	MIMAT0000257	Homo sapiens	miR-181b-5p	hsa-miR-181b-5p	23	100	2e-07
RNAseq_732992	MIMAT0002821	Homo sapiens	miR-181d-5p	hsa-miR-181d-5p	23	95.65	4e-05
RNAseq_737931	MIMAT0019748	Homo sapiens	miR-219b-3p	hsa-miR-219b-3p	21	100	2e-06
RNAseq_737931	MIMAT0000276	Homo sapiens	miR-219a-5p	hsa-miR-219a-5p	21	100	2e-06
RNAseq_742778	MIMAT0004692	Homo sapiens	miR-340-5p	hsa-miR-340-5p	22	100	6e-07
RNAseq_765998	MIMAT0000439	Homo sapiens	miR-153-3p	hsa-miR-153-3p	21	100	2e-06
RNAseq_789310	MIMAT0015056	Homo sapiens	miR-3179	hsa-miR-3179	21	100	2e-06

## Sheet: Mus musculus Homologs
Sequence ID	MIMAT Number	Species	miRNA Family	miRNA Name	Lenght	% Identity	E-value	Hit Number
RNAseq_67	MIMAT0000213	Mus musculus	miR-184-3p	mmu-miR-184-3p	20	100	9e-06	40.1
RNAseq_82	MIMAT0000142	Mus musculus	miR-9-5p	mmu-miR-9-5p	22	100	6e-07	44.1
RNAseq_221	MIMAT0000655	Mus musculus	miR-100-5p	mmu-miR-100-5p	21	100	2e-06	42.1
RNAseq_221	MIMAT0000131	Mus musculus	miR-99a-5p	mmu-miR-99a-5p	21	95.24	0.0006	34.2
RNAseq_391	MIMAT0000648	Mus musculus	miR-10a-5p	mmu-miR-10a-5p	22	100	6e-07	44.1
RNAseq_391	MIMAT0000208	Mus musculus	miR-10b-5p	mmu-miR-10b-5p	22	95.45	0.0001	36.2
RNAseq_791	MIMAT0000145	Mus musculus	miR-133a-3p	mmu-miR-133a-3p	21	100	2e-06	42.1
RNAseq_791	MIMAT0000769	Mus musculus	miR-133b-3p	mmu-miR-133b-3p	20	100	9e-06	40.1
RNAseq_1344	MIMAT0000677	Mus musculus	miR-7a-5p	mmu-miR-7a-5p	23	100	2e-07	46.1
RNAseq_1344	MIMAT0000678	Mus musculus	miR-7b-5p	mmu-miR-7b-5p	23	95.65	4e-05	38.2
RNAseq_1787	MIMAT0000530	Mus musculus	miR-21a-5p	mmu-miR-21a-5p	22	100	6e-07	44.1
RNAseq_4186	MIMAT0004899	Mus musculus	miR-92b-3p	mmu-miR-92b-3p	20	100	9e-06	40.1
RNAseq_4186	MIMAT0000539	Mus musculus	miR-92a-3p	mmu-miR-92a-3p	21	95.24	0.0006	34.2
RNAseq_4830	MIMAT0000136	Mus musculus	miR-125b-5p	mmu-miR-125b-5p	21	100	2e-06	42.1
RNAseq_7894	MIMAT0000134	Mus musculus	miR-124-3p	mmu-miR-124-3p	20	100	9e-06	40.1
RNAseq_8772	MIMAT0000233	Mus musculus	miR-200b-3p	mmu-miR-200b-3p	21	100	2e-06	42.1
RNAseq_12597	MIMAT0000739	Mus musculus	miR-375-3p	mmu-miR-375-3p	20	100	9e-06	40.1
RNAseq_21135	MIMAT0005835	Mus musculus	miR-1b-5p	mmu-miR-1b-5p	21	100	2e-06	42.1
RNAseq_21135	MIMAT0000123	Mus musculus	miR-1a-3p	mmu-miR-1a-3p	21	100	2e-06	42.1
RNAseq_29097	MIMAT0000521	Mus musculus	let-7a-5p	mmu-let-7a-5p	20	100	9e-06	40.1
RNAseq_29097	MIMAT0000525	Mus musculus	let-7f-5p	mmu-let-7f-5p	20	95	0.002	32.2
RNAseq_29097	MIMAT0000524	Mus musculus	let-7e-5p	mmu-let-7e-5p	20	95	0.002	32.2
RNAseq_50404	MIMAT0000580	Mus musculus	miR-148b-3p	mmu-miR-148b-3p	22	100	6e-07	44.1
RNAseq_50404	MIMAT0000516	Mus musculus	miR-148a-3p	mmu-miR-148a-3p	22	90.91	0.035	28.2
RNAseq_50885	MIMAT0000122	Mus musculus	let-7i-5p	mmu-let-7i-5p	20	100	9e-06	40.1
RNAseq_50885	MIMAT0025123	Mus musculus	let-7j	mmu-let-7j	20	95	0.002	32.2
RNAseq_56523	MIMAT0000126	Mus musculus	miR-27b-3p	mmu-miR-27b-3p	20	95	0.002	32.2
RNAseq_66270	MIMAT0000533	Mus musculus	miR-26a-5p	mmu-miR-26a-5p	22	100	6e-07	44.1
RNAseq_66910	MIMAT0004869	Mus musculus	miR-421-3p	mmu-miR-421-3p	23	100	2e-07	46.1
RNAseq_68296	MIMAT0000212	Mus musculus	miR-183-5p	mmu-miR-183-5p	21	95.24	0.0006	34.2
RNAseq_80738	MIMAT0000161	Mus musculus	miR-151-3p	mmu-miR-151-3p	21	95.24	0.0006	34.2
RNAseq_91394	MIMAT0000669	Mus musculus	miR-221-3p	mmu-miR-221-3p	23	100	2e-07	46.1
RNAseq_91727	MIMAT0000236	Mus musculus	miR-203-3p	mmu-miR-203-3p	21	100	2e-06	42.1
RNAseq_129990	MIMAT0000546	Mus musculus	miR-103-3p	mmu-miR-103-3p	23	100	2e-07	46.1
RNAseq_129990	MIMAT0000647	Mus musculus	miR-107-3p	mmu-miR-107-3p	21	100	2e-06	42.1
RNAseq_138899	MIMAT0000140	Mus musculus	miR-128-3p	mmu-miR-128-3p	21	100	2e-06	42.1
RNAseq_140021	MIMAT0000125	Mus musculus	miR-23b-3p	mmu-miR-23b-3p	21	100	2e-06	42.1
RNAseq_145966	MIMAT0004619	Mus musculus	miR-200a-5p	mmu-miR-200a-5p	21	100	2e-06	42.1
RNAseq_146358	MIMAT0000545	Mus musculus	miR-98-5p	mmu-miR-98-5p	22	95.45	0.0001	36.2
RNAseq_156210	MIMAT0000667	Mus musculus	miR-33-5p	mmu-miR-33-5p	21	100	2e-06	42.1
RNAseq_166345	MIMAT0000531	Mus musculus	miR-22-3p	mmu-miR-22-3p	22	100	6e-07	44.1
RNAseq_179246	MIMAT0003151	Mus musculus	miR-378a-3p	mmu-miR-378a-3p	21	100	2e-06	42.1
RNAseq_179246	MIMAT0025138	Mus musculus	miR-378c	mmu-miR-378c	20	100	9e-06	40.1
RNAseq_179246	MIMAT0025167	Mus musculus	miR-378d	mmu-miR-378d	21	95.24	0.0006	34.2
RNAseq_179322	MIMAT0003454	Mus musculus	miR-423-3p	mmu-miR-423-3p	22	100	6e-07	44.1
RNAseq_184699	MIMAT0000249	Mus musculus	miR-30e-3p	mmu-miR-30e-3p	21	100	2e-06	42.1
RNAseq_195925	MIMAT0000519	Mus musculus	miR-200a-3p	mmu-miR-200a-3p	22	100	6e-07	44.1
RNAseq_195925	MIMAT0000153	Mus musculus	miR-141-3p	mmu-miR-141-3p	21	95.24	0.0006	34.2
RNAseq_243943	MIMAT0000535	Mus musculus	miR-29a-3p	mmu-miR-29a-3p	22	100	6e-07	44.1
RNAseq_243943	MIMAT0000536	Mus musculus	miR-29c-3p	mmu-miR-29c-3p	22	95.45	0.0001	36.2
RNAseq_253052	MIMAT0004750	Mus musculus	miR-425-5p	mmu-miR-425-5p	23	100	2e-07	46.1
RNAseq_257594	MIMAT0017009	Mus musculus	miR-106a-3p	mmu-miR-106a-3p	21	95.24	0.0006	34.2
RNAseq_259850	MIMAT0000541	Mus musculus	miR-96-5p	mmu-miR-96-5p	22	100	6e-07	44.1
RNAseq_294559	MIMAT0000658	Mus musculus	miR-210-3p	mmu-miR-210-3p	20	100	9e-06	40.1
RNAseq_302622	MIMAT0000537	Mus musculus	miR-27a-3p	mmu-miR-27a-3p	20	100	9e-06	40.1
RNAseq_327312	MIMAT0004661	Mus musculus	miR-28a-3p	mmu-miR-28a-3p	22	95.45	0.0001	36.2
RNAseq_361206	MIMAT0000527	Mus musculus	miR-16-5p	mmu-miR-16-5p	21	100	2e-06	42.1
RNAseq_363143	MIMAT0000211	Mus musculus	miR-182-5p	mmu-miR-182-5p	23	100	2e-07	46.1
RNAseq_372120	MIMAT0019352	Mus musculus	miR-3968	mmu-miR-3968	21	95.24	0.0006	34.2
RNAseq_374155	MIMAT0000219	Mus musculus	miR-24-3p	mmu-miR-24-3p	22	95.45	0.0001	36.2
RNAseq_386634	MIMAT0011213	Mus musculus	miR-2137	mmu-miR-2137	21	95.24	0.0006	34.2
RNAseq_411092	MIMAT0000670	Mus musculus	miR-222-3p	mmu-miR-222-3p	20	100	9e-06	40.1
RNAseq_432711	MIMAT0002889	Mus musculus	miR-532-5p	mmu-miR-532-5p	22	100	6e-07	44.1
RNAseq_454693	MIMAT0004536	Mus musculus	miR-151-5p	mmu-miR-151-5p	21	100	2e-06	42.1
RNAseq_460740	MIMAT0024861	Mus musculus	miR-6240	mmu-miR-6240	25	92	0.0006	34.2
RNAseq_463261	MIMAT0014856	Mus musculus	miR-3074-5p	mmu-miR-3074-5p	20	100	9e-06	40.1
RNAseq_478901	MIMAT0000221	Mus musculus	miR-191-5p	mmu-miR-191-5p	20	100	9e-06	40.1
RNAseq_490781	MIMAT0000652	Mus musculus	miR-25-3p	mmu-miR-25-3p	22	100	6e-07	44.1
RNAseq_550229	MIMAT0000654	Mus musculus	miR-32-5p	mmu-miR-32-5p	22	100	6e-07	44.1
RNAseq_576130	MIMAT0000518	Mus musculus	miR-196a-5p	mmu-miR-196a-5p	21	100	2e-06	42.1
RNAseq_593956	MIMAT0000666	Mus musculus	miR-320-3p	mmu-miR-320-3p	22	100	6e-07	44.1
RNAseq_596886	MIMAT0000162	Mus musculus	miR-152-3p	mmu-miR-152-3p	20	100	9e-06	40.1
RNAseq_636920	MIMAT0000529	Mus musculus	miR-20a-5p	mmu-miR-20a-5p	23	100	2e-07	46.1
RNAseq_636920	MIMAT0003187	Mus musculus	miR-20b-5p	mmu-miR-20b-5p	22	95.45	0.0001	36.2
RNAseq_636920	MIMAT0000649	Mus musculus	miR-17-5p	mmu-miR-17-5p	22	95.45	0.0001	36.2
RNAseq_636920	MIMAT0000385	Mus musculus	miR-106a-5p	mmu-miR-106a-5p	22	90.91	0.035	28.2
RNAseq_641358	MIMAT0004582	Mus musculus	miR-106b-3p	mmu-miR-106b-3p	21	100	2e-06	42.1
RNAseq_682795	MIMAT0000215	Mus musculus	miR-186-5p	mmu-miR-186-5p	21	100	2e-06	42.1
RNAseq_684936	MIMAT0000540	Mus musculus	miR-93-5p	mmu-miR-93-5p	23	100	2e-07	46.1
RNAseq_685248	MIMAT0000517	Mus musculus	miR-192-5p	mmu-miR-192-5p	21	100	2e-06	42.1
RNAseq_704245	MIMAT0029804	Mus musculus	miR-7651-5p	mmu-miR-7651-5p	20	95	0.002	32.2
RNAseq_723768	MIMAT0000224	Mus musculus	miR-194-5p	mmu-miR-194-5p	22	90.91	0.035	28.2
RNAseq_724251	MIMAT0004896	Mus musculus	miR-590-3p	mmu-miR-590-3p	21	100	2e-06	42.1
RNAseq_732992	MIMAT0000673	Mus musculus	miR-181b-5p	mmu-miR-181b-5p	23	100	2e-07	46.1
RNAseq_732992	MIMAT0004324	Mus musculus	miR-181d-5p	mmu-miR-181d-5p	23	95.65	4e-05	38.2
RNAseq_737931	MIMAT0029807	Mus musculus	miR-219b-3p	mmu-miR-219b-3p	21	100	2e-06	42.1
RNAseq_737931	MIMAT0000664	Mus musculus	miR-219a-5p	mmu-miR-219a-5p	21	100	2e-06	42.1
RNAseq_737931	MIMAT0029893	Mus musculus	miR-219c-3p	mmu-miR-219c-3p	20	100	9e-06	40.1
RNAseq_742778	MIMAT0004651	Mus musculus	miR-340-5p	mmu-miR-340-5p	22	100	6e-07	44.1
RNAseq_765998	MIMAT0000163	Mus musculus	miR-153-3p	mmu-miR-153-3p	21	100	2e-06	42.1

## Sheet: D. melanogaster Homologs
Sequence ID	MIMAT Number	Species	miRNA Family	miRNA Name	Lenght	% Identity	E-value
RNAseq_1	MIMAT0000407	Drosophila melanogaster	miR-315-5p	dme-miR-315-5p	20	100	9e-06
RNAseq_21	MIMAT0000365	Drosophila melanogaster	bantam-3p	dme-bantam-3p	22	95.45	0.0001
RNAseq_40	MIMAT0000337	Drosophila melanogaster	miR-276a-3p	dme-miR-276a-3p	22	100	6e-07
RNAseq_40	MIMAT0000354	Drosophila melanogaster	miR-276b-3p	dme-miR-276b-3p	22	95.45	0.0001
RNAseq_67	MIMAT0000331	Drosophila melanogaster	miR-184-3p	dme-miR-184-3p	21	100	2e-06
RNAseq_82	MIMAT0000114	Drosophila melanogaster	miR-9a-5p	dme-miR-9a-5p	22	100	6e-07
RNAseq_221	MIMAT0000357	Drosophila melanogaster	miR-100-5p	dme-miR-100-5p	21	95.24	0.0006
RNAseq_377	MIMAT0000319	Drosophila melanogaster	miR-263a-5p	dme-miR-263a-5p	22	100	6e-07
RNAseq_391	MIMAT0000115	Drosophila melanogaster	miR-10-5p	dme-miR-10-5p	21	100	2e-06
RNAseq_433	MIMAT0000391	Drosophila melanogaster	miR-305-5p	dme-miR-305-5p	23	100	2e-07
RNAseq_471	MIMAT0000333	Drosophila melanogaster	miR-275-3p	dme-miR-275-3p	23	100	2e-07
RNAseq_791	MIMAT0000340	Drosophila melanogaster	miR-133-3p	dme-miR-133-3p	22	100	6e-07
RNAseq_834	MIMAT0000106	Drosophila melanogaster	miR-2a-3p	dme-miR-2a-3p	23	100	2e-07
RNAseq_834	MIMAT0000411	Drosophila melanogaster	miR-2c-3p	dme-miR-2c-3p	20	100	9e-06
RNAseq_834	MIMAT0000107	Drosophila melanogaster	miR-2b-3p	dme-miR-2b-3p	23	95.65	4e-05
RNAseq_1092	MIMAT0005507	Drosophila melanogaster	miR-137-3p	dme-miR-137-3p	22	100	6e-07
RNAseq_1344	MIMAT0000112	Drosophila melanogaster	miR-7-5p	dme-miR-7-5p	23	100	2e-07
RNAseq_1376	MIMAT0000350	Drosophila melanogaster	miR-34-5p	dme-miR-34-5p	22	100	6e-07
RNAseq_1635	MIMAT0000113	Drosophila melanogaster	miR-8-3p	dme-miR-8-3p	23	100	2e-07
RNAseq_1794	MIMAT0000412	Drosophila melanogaster	miR-iab-4-5p	dme-miR-iab-4-5p	21	100	2e-06
RNAseq_2287	MIMAT0000347	Drosophila melanogaster	miR-283-5p	dme-miR-283-5p	22	95.45	0.0001
RNAseq_3131	MIMAT0000400	Drosophila melanogaster	miR-31a-5p	dme-miR-31a-5p	22	100	6e-07
RNAseq_3131	MIMAT0000389	Drosophila melanogaster	miR-31b-5p	dme-miR-31b-5p	21	95.24	0.0006
RNAseq_3538	MIMAT0000117	Drosophila melanogaster	miR-12-5p	dme-miR-12-5p	23	100	2e-07
RNAseq_3610	MIMAT0005480	Drosophila melanogaster	miR-965-3p	dme-miR-965-3p	21	95.24	0.0006
RNAseq_4186	MIMAT0000358	Drosophila melanogaster	miR-92b-3p	dme-miR-92b-3p	20	95	0.002
RNAseq_4195	MIMAT0005516	Drosophila melanogaster	miR-252-5p	dme-miR-252-5p	21	95.24	0.0006
RNAseq_4547	MIMAT0000355	Drosophila melanogaster	miR-210-3p	dme-miR-210-3p	21	100	2e-06
RNAseq_4830	MIMAT0000397	Drosophila melanogaster	miR-125-5p	dme-miR-125-5p	21	100	2e-06
RNAseq_5670	MIMAT0005467	Drosophila melanogaster	miR-190-5p	dme-miR-190-5p	21	100	2e-06
RNAseq_5843	MIMAT0005497	Drosophila melanogaster	miR-981-3p	dme-miR-981-3p	22	100	6e-07
RNAseq_7894	MIMAT0000351	Drosophila melanogaster	miR-124-3p	dme-miR-124-3p	21	100	2e-06
RNAseq_12929	MIMAT0000361	Drosophila melanogaster	miR-87-3p	dme-miR-87-3p	20	95	0.002
RNAseq_14749	MIMAT0005512	Drosophila melanogaster	miR-993-3p	dme-miR-993-3p	22	95.45	0.0001
RNAseq_29097	MIMAT0000396	Drosophila melanogaster	let-7-5p	dme-let-7-5p	20	100	9e-06
RNAseq_31722	MIMAT0020791	Drosophila melanogaster	miR-8-5p	dme-miR-8-5p	22	100	6e-07
RNAseq_41931	MIMAT0012531	Drosophila melanogaster	miR-10-3p	dme-miR-10-3p	23	100	2e-07
RNAseq_62621	MIMAT0020815	Drosophila melanogaster	miR-276b-5p	dme-miR-276b-5p	22	100	6e-07
RNAseq_62621	MIMAT0000336	Drosophila melanogaster	miR-276a-5p	dme-miR-276a-5p	22	100	6e-07
RNAseq_98839	MIMAT0000398	Drosophila melanogaster	miR-307a-3p	dme-miR-307a-3p	20	100	9e-06
RNAseq_100356	MIMAT0000346	Drosophila melanogaster	miR-282-5p	dme-miR-282-5p	22	95.45	0.0001
RNAseq_509704	MIMAT0005463	Drosophila melanogaster	miR-iab-8-5p	dme-miR-iab-8-5p	23	100	2e-07
RNAseq_509704	MIMAT0000413	Drosophila melanogaster	miR-iab-4-3p	dme-miR-iab-4-3p	23	100	2e-07
RNAseq_556713	MIMAT0020161	Drosophila melanogaster	miR-4949-3p	dme-miR-4949-3p	20	95	0.002
RNAseq_737931	MIMAT0000335	Drosophila melanogaster	miR-219-5p	dme-miR-219-5p	21	100	2e-06

## Sheet: C. elegans Homologs
Sequence ID	MIMAT Number	Species	miRNA Family	miRNA Name	Lenght	% Identity	E-value	Hit Number
RNAseq_834	MIMAT0000004	Caenorhabditis elegans	miR-2-3p	cel-miR-2-3p	20	100	9e-06	40.1
RNAseq_1277	MIMAT0000043	Caenorhabditis elegans	miR-71-5p	cel-miR-71-5p	21	100	2e-06	42.1
RNAseq_1376	MIMAT0000005	Caenorhabditis elegans	miR-34-5p	cel-miR-34-5p	21	100	2e-06	42.1
RNAseq_3131	MIMAT0000044	Caenorhabditis elegans	miR-72-5p	cel-miR-72-5p	23	95.65	4e-05	38.2
RNAseq_7894	MIMAT0000282	Caenorhabditis elegans	miR-124-3p	cel-miR-124-3p	21	100	2e-06	42.1
RNAseq_12929	MIMAT0000060	Caenorhabditis elegans	miR-87-3p	cel-miR-87-3p	21	100	2e-06	42.1
RNAseq_21135	MIMAT0000003	Caenorhabditis elegans	miR-1-3p	cel-miR-1-3p	21	100	2e-06	42.1
RNAseq_27246	MIMAT0000054	Caenorhabditis elegans	miR-81-3p	cel-miR-81-3p	21	95.24	0.0006	34.2
RNAseq_29097	MIMAT0000001	Caenorhabditis elegans	let-7-5p	cel-let-7-5p	20	100	9e-06	40.1
RNAseq_36410	MIMAT0000308	Caenorhabditis elegans	miR-252-5p	cel-miR-252-5p	22	100	6e-07	44.1
RNAseq_46997	MIMAT0000055	Caenorhabditis elegans	miR-82-3p	cel-miR-82-3p	21	95.24	0.0006	34.2
RNAseq_52752	MIMAT0000051	Caenorhabditis elegans	miR-79-3p	cel-miR-79-3p	20	100	9e-06	40.1
RNAseq_91577	MIMAT0000017	Caenorhabditis elegans	miR-46-3p	cel-miR-46-3p	20	95	0.002	32.2
RNAseq_144770	MIMAT0000291	Caenorhabditis elegans	miR-236-3p	cel-miR-236-3p	21	95.24	0.0006	34.2

## Sheet: D. pulex Homologs
S1 Table. Raw data after miRNA sequence analysis.
Sequence ID	MIMAT Number	Species	miRNA Family	miRNA Name	Lenght	% Identity	E-value
RNAseq_1	MIMAT0012660	Daphnia pulex	miR-315	dpu-miR-315	20	100	9e-06
RNAseq_21	MIMAT0012634	Daphnia pulex	bantam	dpu-bantam	22	100	6e-07
RNAseq_25	MIMAT0012655	Daphnia pulex	miR-281	dpu-miR-281	20	95	0.002
RNAseq_40	MIMAT0012652	Daphnia pulex	miR-276	dpu-miR-276	22	100	6e-07
RNAseq_82	MIMAT0012671	Daphnia pulex	miR-9-5p	dpu-miR-9-5p	22	100	6e-07
RNAseq_141	MIMAT0012650	Daphnia pulex	miR-263b	dpu-miR-263b	21	100	2e-06
RNAseq_153	MIMAT0012661	Daphnia pulex	miR-317	dpu-miR-317	22	100	6e-07
RNAseq_201	MIMAT0012653	Daphnia pulex	miR-278	dpu-miR-278	21	100	2e-06
RNAseq_221	MIMAT0012637	Daphnia pulex	miR-100	dpu-miR-100	21	100	2e-06
RNAseq_377	MIMAT0012649	Daphnia pulex	miR-263a	dpu-miR-263a	21	100	2e-06
RNAseq_391	MIMAT0012636	Daphnia pulex	miR-10	dpu-miR-10	22	100	6e-07
RNAseq_433	MIMAT0018924	Daphnia pulex	miR-305	dpu-miR-305	21	95.24	0.0006
RNAseq_471	MIMAT0012651	Daphnia pulex	miR-275	dpu-miR-275	23	100	2e-07
RNAseq_791	MIMAT0012640	Daphnia pulex	miR-133	dpu-miR-133	22	100	6e-07
RNAseq_834	MIMAT0012657	Daphnia pulex	miR-2	dpu-miR-2	23	100	2e-07
RNAseq_1092	MIMAT0012641	Daphnia pulex	miR-137	dpu-miR-137	20	100	9e-06
RNAseq_1277	MIMAT0012667	Daphnia pulex	miR-71	dpu-miR-71	23	100	2e-07
RNAseq_1344	MIMAT0012666	Daphnia pulex	miR-7	dpu-miR-7	23	100	2e-07
RNAseq_1376	MIMAT0012663	Daphnia pulex	miR-34	dpu-miR-34	22	100	6e-07
RNAseq_1635	MIMAT0012669	Daphnia pulex	miR-8	dpu-miR-8	23	100	2e-07
RNAseq_1794	MIMAT0012677	Daphnia pulex	miR-iab-4-5p	dpu-miR-iab-4-5p	21	100	2e-06
RNAseq_2287	MIMAT0012644	Daphnia pulex	miR-283	dpu-miR-283	20	100	9e-06
RNAseq_3131	MIMAT0012659	Daphnia pulex	miR-31	dpu-miR-31	23	100	2e-07
RNAseq_3538	MIMAT0012638	Daphnia pulex	miR-12	dpu-miR-12	23	100	2e-07
RNAseq_3610	MIMAT0012674	Daphnia pulex	miR-965	dpu-miR-965	22	100	6e-07
RNAseq_3953	MIMAT0018923	Daphnia pulex	miR-279b	dpu-miR-279b	22	100	6e-07
RNAseq_4186	MIMAT0012672	Daphnia pulex	miR-92	dpu-miR-92	20	100	9e-06
RNAseq_4195	MIMAT0012647	Daphnia pulex	miR-252a	dpu-miR-252a	21	100	2e-06
RNAseq_5022	MIMAT0012656	Daphnia pulex	miR-285	dpu-miR-285	22	100	6e-07
RNAseq_5843	MIMAT0012675	Daphnia pulex	miR-981	dpu-miR-981	22	100	6e-07
RNAseq_6995	MIMAT0012646	Daphnia pulex	miR-745	dpu-miR-745	22	100	6e-07
RNAseq_7894	MIMAT0012639	Daphnia pulex	miR-124	dpu-miR-124	21	100	2e-06
RNAseq_14749	MIMAT0012676	Daphnia pulex	miR-993	dpu-miR-993	22	100	6e-07
RNAseq_26104	MIMAT0012668	Daphnia pulex	miR-9-3p	dpu-miR-9-3p	23	95.65	4e-05
RNAseq_36410	MIMAT0012648	Daphnia pulex	miR-252b	dpu-miR-252b	22	100	6e-07
RNAseq_86870	MIMAT0012643	Daphnia pulex	miR-193	dpu-miR-193	21	95.24	0.0006
RNAseq_98839	MIMAT0012665	Daphnia pulex	miR-307	dpu-miR-307	20	100	9e-06
RNAseq_156210	MIMAT0012662	Daphnia pulex	miR-33	dpu-miR-33	21	100	2e-06
RNAseq_509704	MIMAT0012678	Daphnia pulex	miR-iab-4-3p	dpu-miR-iab-4-3p	23	100	2e-07
RNAseq_737931	MIMAT0012645	Daphnia pulex	miR-219	dpu-miR-219	22	100	6e-07
RNAseq_765998	MIMAT0012642	Daphnia pulex	miR-153	dpu-miR-153	22	100	6e-07
