# Supplementary material for: Small RNA Sequencing Based Identification of MiRNAs in Daphnia magna
Source: PLoS One. 2015 Sep 14;10(9):e0137617. doi: 10.1371/journal.pone.0137617 (PMC4569176; doi:10.1371/journal.pone.0137617)
Supplement: S2 Table — Predicted miRNA sequences were named by adding a dma- suffix to homologous sequence names identified in other species. Trimmed versions of raw sequence read data are presented as predicted mature miRNA sequence. A simple Perl code was used to trim adaptor sequences from the raw data and calculate the sequence lengths. (XLSX) [file pone.0137617.s002.xlsx]

## Sheet: D. magna
S2 Table: Predicted miRNA sequences and corresponding mature miRNA sequences.
ID #	miRNA Family	Predicted miRNA Name	Predicted Mature miRNA Sequence	Sequence Length
1	mir-1	dma-mir-1a	UGGAAUGUAAAGAAGUAUGGAG	22
		dma-mir-1b	CGUGCUUCCUUACUUCCCAUA	21
2	mir-2	dma-mir-2	UAUCACAGCCAGCUUUGAUGAGCG	24
3	mir-7	dma-mir-7	UGGAAGACUAGUGAUUUUGUUGU	23
4	mir-8	dma-mir-8a	UAAUACUGUCAGGUAAAGAUGUC	23
		dma-mir-8b	CAUCUUACCGGGCAGCAUUAGA	22
5	mir-9	dma-mir-9-5p	CUUUGGUUAUCUAGCUGUAUGA	22
		dma-mir-9-3p	AUAAAGCUAGGUUACCUAAGUUA	23
6	mir-10	dma-mir-10a	UACCCUGUAGAUCCGAAUUUGU	22
		dma-mir-10b	CAAAUUCGGUUCUAGAGAGGUUU	23
7	mir-12	dma-mir-12	UGAGUAUUACAUCAGGUACUGGU	23
8	mir-16	dma-mir-16	UAGCAGCACGUAAAUAUUGGC	21
9	mir-17	dma-mir-17	UAAAGUGCUUAUAGUGCAGGUAG	23
10	mir-21	dma-mir-21	UAGCUUAUCAGACUGAUGUUGAC	23
11	mir-22	dma-mir-22	AAGCUGCCAGUUGAAGAACUGU	22
12	mir-23	dma-mir-23	AUCACAUUGCCAGGGAUUACCAC	23
13	mir-24	dma-mir-24	UGGCUCAGUUCAGCAGGGACAG	22
14	mir-25	dma-mir-25	CAUUGCACUUGUCUCGGUCUGA	22
15	mir-26	dma-mir-26	UUCAAGUAAUCCAGGAUAGGCU	22
16	mir-27	dma-mir-27b	UUCAUAGUGGCUAAGUUCUG	20
		dma-mir-27a	AUCACAGUGGCUAAGUUCCG	20
17	mir-28	dma-mir-28	CACUAGAUUGUGAGCUCCUGGA	22
18	mir-29	dma-mir-29	UAGCACCAUCUGAAAUCGGUUA	22
19	mir-30	dma-mir-30a	UGUAAACAUCCCCGACUGGUAGCU	24
		dma-mir-30b	CUUUCAGUCGGAUGUUUACAG	21
20	mir-31	dma-mir-31	AGGCAAGAUGUCGGCAUAGCUGA	23
21	mir-32	dma-mir-32	UAUUGCACAUUACUAAGUUGCA	22
22	mir-33	dma-mir-33	GUGCAUUGUAGUUGCAUUGCA	21
23	mir-34	dma-mir-34	UGGCAGUGUGGUUAGCUGGUUG	22
24	mir-46	dma-mir-46	UGUCAUGGAGUUGCUCUCUUUAA	23
25	mir-50	dma-mir-50	AGAUAUGUUUGAUAUUCUUGG	21
26	mir-61	dma-mir-61	UGACUAGAUCCACACUCAGC	20
27	mir-67	dma-mir-67	UCACAACCUCCUUGAGUGAGU	21
28	mir-71	dma-mir-71	UGAAAGACAUGGGUAGUGAGAUG	23
29	mir-76	dma-mir-76	UUCGUUGUCGAUGAAACCUGCA	22
30	mir-79	dma-mir-79-3p	AUAAAGCUAGGUUACCAAAGUUA	23
31	mir-81	dma-mir-81	UGAGAUCAUUGUGAAAGCUA	20
32	mir-82	dma-mir-82	UGAGAUCAUUGUGAAAGCCAG	21
33	mir-87	dma-mir-87	GUGAGCAAAGUUUCAGGUGUG	21
34	mir-92	dma-mir-92	UAUUGCACUCGUCCCGGCCUGU	22
35	mir-93	dma-mir-93	CAAAGUGCUGUUCGUGCAGGUAG	23
36	mir-96	dma-mir-96	UUUGGCACUAGCACAUUUUUGC	22
37	mir-98	dma-mir-98	UGAGGUAGUAGGUUGUAUUGUU	22
38	mir-99	dma-mir-99	AACCCGUAGAUCCGAACUUGUG	22
39	mir-100	dma-mir-100	ACCCGUAGAUCCGAACUUGUG	21
40	mir-103	dma-mir-103	AGCAGCAUUGUACAGGGCUAUGA	23
41	mir-106	dma-mir-106b	UAAAGUGCUUAUAGUGCAGGUAG	23
		dma-mir-106c	CCGCACUGUGGGUACUUGCUG	21
42	mir-124	dma-mir-124	UAAGGCACGCGGUGAAUGCCA	21
43	mir-125	dma-mir-125	UCCCUGAGACCCUAACUUGUG	21
44	mir-128	dma-mir-128	UCACAGUGAACCGGUCUCUUUU	22
45	mir-133	dma-mir-133	UUGGUCCCCUUCAACCAGCUGU	22
46	mir-137	dma-mir-137	UUAUUGCUUGAGAAUACACGUAG	23
47	mir-141	dma-mir-141	UAACACUGUCUGGUAACGAUGUU	23
48	mir-146	dma-mir-146	UAGCACCAUUGGAAUUCAGUU	21
49	mir-148	dma-mir-148	UCAGUGCAUCACAGAACUUUGU	22
50	mir-151	dma-mir-151-3p	CUAGACUGAAGCUCCUUGAGGA	22
		dma-mir-151-5p	UCGAGGAGCUCACAGUCUAGUA	22
51	mir-152	dma-mir-152	UCAGUGCAUGACAGAACUUGA	21
52	mir-153	dma-mir-153	UUGCAUAGUCACAAAAGUGAUG	22
53	mir-181	dma-mir-181	CAACAUUCAUUGCUGUCGGUGGG	23
54	mir-182	dma-mir-182	UUUGGCAAUGGUAGAACUCACACU	24
55	mir-183	dma-mir-183	UAUGGCACUGGUAGAAUUCACU	22
56	mir-184	dma-mir-184	GGACGGAGAACUGAUAAGGGC	21
57	mir-186	dma-mir-186	CAAAGAAUUCUCCUUUUGGGC	21
58	mir-191	dma-mir-191	AACGGAAUCCCAAAAGCAGC	20
59	mir-192	dma-mir-192	CUGACCUAUGAAUUGACAGCCAG	23
60	mir-193	dma-mir-193	UACUGGCCCGCUAAGUCCCAAG	22
61	mir-194	dma-mir-194	UGUAACAGCAACUUCUUGUGGA	22
62	mir-196	dma-mir-196	AAGGUAGUUUCAUGUUGUUGG	21
63	mir-200	dma-mir-200a	AUCUUACCGGACAGUGCUGGA	21
		dma-mir-200b	AAAUACUGCCUGGUAAUGAUGA	22
64	mir-203	dma-mir-203	UGAAAUGUUUAGGACCACUAG	21
65	mir-205	dma-mir-205	CAGACUCGCGUGGAAUGAAG	20
66	mir-210	dma-mir-210	AUGUGCGUGUGACAGCGGCUA	21
67	mir-216	dma-mir-216	AAAUAUCAGCAGGUAAUUCU	20
68	mir-219	dma-mir-219	UGAUUGUCCAAACGCAAUUCUUG	23
69	mir-221	dma-mir-221	AGCUACAUUGUCUGCUGGGUUUC	23
70	mir-222	dma-mir-222	CGCUACAUCUGGCUACUGGGUCU	23
71	mir-228	dma-mir-228a	AAUGGCACUAGAAGAACUCACGG	23
		dma-mir-228b	AAAAUGGCACUGGAAGAAUUCAC	23
72	mir-236	dma-mir-236	UAAUACUGUCAGGUAAAGACG	21
73	mir-251	dma-mir-251	CUAAGUAGUAGUGCCGCAGGUAA	23
74	mir-252	dma-mir-252	UAAGUACUCGUGCCGCAGGAG	21
75	mir-263	dma-mir-263a	AAUGGCACUGGAAGAAUUCACG	22
		dma-mir-263b	UUGGCACUGGAAGAAUUCACAGA	23
76	mir-275	dma-mir-275	UCAGGUACCUGAAGUAGCGCGCG	23
77	mir-276	dma-mir-276-3p	UAGGAACUUCAUACCGUGCUCU	22
		dma-mir-276-5p	AGCGAGGUAUAGAGUUCCUACG	22
78	mir-278	dma-mir-278	CGGUGGGACUUUCGUCCGUGU	21
79	mir-279	dma-mir-279	UGACUAGAACCCACACUCGUCC	22
80	mir-281	dma-mir-281	UGUCAUGCAGCUGCUCUCUU	20
81	mir-282	dma-mir-282	UAGCCUCUCCUAGGCUUUGUCU	22
82	mir-283	dma-mir-283	AAAUAUCAGCAGGUAAUUCU	20
83	mir-285	dma-mir-285	UAGCACCAUUGGAAUUCAGUUU	22
84	mir-305	dma-mir-305	AUUGUACUUCAUCAGGUGCUCUG	23
85	mir-315	dma-mir-315	UUUGAUUGUUGCUCAGAAAG	20
86	mir-317	dma-mir-317	GAACACAGCUGGUGGUAUCUCA	22
87	mir-330	dma-mir-330	AAAAGCUGGGUUGAGAGGGCGAA	23
88	mir-340	dma-mir-340	UUAUAAAGCAAUGAGACUGAUU	22
89	mir-372	dma-mir-372	AAGUGCUGCGACAUUUGAGCGU	22
90	mir-375	dma-mir-375	UUUGUUCGUUCGGCUCGCGUUA	22
91	mir-378	dma-mir-378	ACUGGACUUGGAGUCAGAAGGC	22
92	mir-414	dma-mir-414	AUGACGAUGAUGAUGACGAU	20
93	mir-418	dma-mir-418	UUUGAAUGUGAAAAUGAAAU	20
94	mir-421	dma-mir-421	AUCAACAGACAUUAAUUGGGCGC	23
95	mir-423	dma-mir-423	AGCUCGGUCUGAGGCCCCUCAG	22
96	mir-425	dma-mir-425	AAUGACACGAUCACUCCCGUUGA	23
97	mir-429	dma-mir-429	UAAUACUGUCUGGUAAAACCGU	22
98	mir-474	dma-mir-474	UAAAGCUGUUGGUUGUGGCU	20
99	mir-500	dma-mir-500	AUGCACCUGGGCAAGGAUUCUG	22
100	mir-509	dma-mir-509	UAUGCUCCUUGAGACGGCUG	20
101	mir-512	dma-mir-512	UGUGUGUAGUGCUAUAAUUGC	21
102	mir-532	dma-mir-532	CAUGCCUUGAGUGUAGGACCGU	22
103	mir-589	dma-mir-589	UGAGAACCACGUCUGCUCUGA	21
104	mir-590	dma-mir-590	UAAUUUUAUGUAUAAGCUAGU	21
105	mir-702	dma-mir-702	CCGUUCAGUGGGGUAAAAGG	20
106	mir-716	dma-mir-716	GCAGAUCUUGGUGGUAGUAG	20
107	mir-745	dma-mir-745	GAGCUGCCCAGUGAAGGGCUUU	22
108	mir-750	dma-mir-750	CCAGAUCUAUCUCUUCCAGCUCA	23
109	mir-753	dma-mir-753	UGAGAUCAUUGUGAAAGCUCU	21
110	mir-755	dma-mir-755	UGAGAUUCAACUACUCCAACUA	22
111	mir-965	dma-mir-965	UAAGCGUAUGGCUUUUCCCCUG	22
112	mir-981	dma-mir-981	UUCGUUGUCGACGAAACCUGCA	22
113	mir-993	dma-mir-993	GAAGCUCGUUUCUACAGGUAUC	22
114	mir-996	dma-mir-996	UGACUAGAUCCAUACUCGUCUA	22
115	mir-998	dma-mir-998	UAGCACCAUUGGAAUUCAGC	20
116	mir-1160	dma-mir-1160	CUUGGUGACAAGGAAGAAGA	20
117	mir-1175	dma-mir-1175	UGAGAUUCAACUACUCCAACUU	22
118	mir-1180	dma-mir-1180	UUUCCGGCUCGCGUGGGUGUGU	22
119	mir-1262	dma-mir-1262	AUGGGUGAAUUUGUAGAAGGA	21
120	mir-1266	dma-mir-1266	GGGGGGGCUCACGGCUGUAG	20
121	mir-1307	dma-mir-1307	CUCGGCGUGGCGUCGGUCGUG	21
122	mir-1468	dma-mir-1468	UAUGAAUACAAAAUAACAAA	20
123	mir-1582	dma-mir-1582	CGAAAGAGAGCCGUAACACA	20
124	mir-1692	dma-mir-1692	UGGCUGUAGCUCAGUUGGUA	20
125	mir-1850	dma-mir-1850	UGGAAGGUGGGGAGAUUGGGG	21
126	mir-2096	dma-mir-2096	GACAACAUCGCCGGAGAGGGA	21
127	mir-2137	dma-mir-2137	AGCCGGCGGGAGCCCCGGGG	20
128	mir-2165	dma-mir-2165	UGAGACUGAUUCUCUCCUGUA	21
129	mir-2288	dma-mir-2288	UGAGGUAGUAGGUUGUGUGGUU	22
130	mir-2325	dma-mir-2325	UUGGGGGGGGGGAGAAAAGG	20
131	mir-2354	dma-mir-2354	UGAGGUAGUAGGUUGUAUGGUU	22
132	mir-2452	dma-mir-2452	UCCCCAAUUGGCUCAAAAAA	20
133	mir-2462	dma-mir-2462	UAAUUUUUGAAAGGAUUGGCU	21
134	mir-2484	dma-mir-2484	AAGCUAUGAUGAAUUUGAUUGCA	23
135	mir-2755	dma-mir-2755	UGGAAACAACACUCUCGCUA	20
136	mir-2916	dma-mir-2916	GUUGGGGGCUCGAAGACGAU	20
137	mir-2941	dma-mir-2941	AGAUCGAAAUUGAAAUCGGCU	21
138	mir-3074	dma-mir-3074	UGGCUCAGUUCAGCAGGAACAG	22
139	mir-3179	dma-mir-3179	UAGAAGGGGUGAAAUUUAAAC	21
140	mir-3290	dma-mir-3290	UUCAUGUAAUUAAAUUUCUG	20
141	mir-3357	dma-mir-3357	GGGGGGAAAGGGAAAAGACC	20
142	mir-3428	dma-mir-3428	UUUUACGGGGGCUCGAGAUAGG	22
143	mir-3478	dma-mir-3478	UCACCGGGUAGAAUUCAUCCA	21
144	mir-3548	dma-mir-3548	CAUCCUACCGGACAGUGCUGGA	22
145	mir-3553	dma-mir-3553	UAUGGCACUGGAAGAAUUCACGG	23
146	mir-3571	dma-mir-3571	UGGAAUGUAAAGAAGUAUGUAG	22
147	mir-3574	dma-mir-3574	CUUGUGCGUGUGACAGCGGCU	21
148	mir-3583	dma-mir-3583	UCCAACUCCUGUAGCAUGAA	20
149	mir-3704	dma-mir-3704	UUUGUUUCUCGGUGGAGAUC	20
150	mir-3880	dma-mir-3880	CGGACAACAUCGCCGGAGGUC	21
151	mir-3968	dma-mir-3968	CGAAUCCCACUCCUGACACCA	21
152	mir-4057	dma-mir-4057	GAUCUUGGUGGUAGUAGCAA	20
153	mir-4083	dma-mir-4083	AUAACUGUGGUAUAAUAGAA	20
154	mir-4171	dma-mir-4171	ACUAUGACUCUCUUAAGGUA	20
155	mir-4448	dma-mir-4448	GGCUCGUUGGUCUAGGGGUA	20
156	mir-4510	dma-mir-4510	UGAGGGAGUAGGGUGUAUGGUU	22
157	mir-4542	dma-mir-4542	UCAAGGGCAUUUUGGAAGGUG	21
158	mir-4547	dma-mir-4547	UCUUUAGCGGGCUCUUUUCGCG	22
159	mir-4614	dma-mir-4614	GAGAACGGGAGAUUUUUGGAU	21
160	mir-4664	dma-mir-4664	AGACGGGGCUCAUAGAUCGGAA	22
161	mir-4820	dma-mir-4820	CUCGGUGGACGUUGAGCUUC	20
162	mir-4943	dma-mir-4943	AAAAGACAAAGAAAAUAAAA	20
163	mir-4949	dma-mir-4949	UGGUGUGCGUGUGUGUCUCG	20
164	mir-4995	dma-mir-4995	UCAUAGGCAGUGGCUUGGUUA	21
165	mir-5112	dma-mir-5112	GCCCGGCUAGCUCAGUCGGG	20
166	mir-5347	dma-mir-5347	UAUCUUCGAUCUCUGUCAAC	20
167	mir-6089	dma-mir-6089	GGGAGGUCGGGGUGGGGCGG	20
168	mir-6112	dma-mir-6112	GGGGUUUCAAGUGUUGAAAA	20
169	mir-6173	dma-mir-6173	CUAGCCGUAAACGAUGGAUA	20
170	mir-6197	dma-mir-6197	GUCUUACAUUUGGGAUCAGA	20
171	mir-6229	dma-mir-6229	UUUUCGCGGCGGGUGAGAAG	20
172	mir-6240	dma-mir-6240	AAAACAAAGCAUCGCGCAGGCCCGC	25
173	mir-6478	dma-mir-6478	ACCAACUGAGCCAAGAUCGG	20
174	mir-6782	dma-mir-6782	CCCGGGGGGGAAAAAGGGAAA	21
175	mir-6830	dma-mir-6830	UCACUGUCUUUCCUCUCUCC	20
176	mir-6945	dma-mir-6945	GAGGGUAGAUGGGAAGGGCAC	21
177	mir-7170	dma-mir-7170	UGACCACCAAGGACUGCUGGAU	22
178	mir-7373	dma-mir-7373	UACUGUUCUUGCCCUGUUGU	20
179	mir-7572	dma-mir-7572	UAGGAAACACUGUAAAUCUGC	21
180	mir-7651	dma-mir-7651	GCGGUGGAAAGCCAGCGUGA	20
181	mir-7685	dma-mir-7685	UUGGCCAUGACCUAAGACUU	20
182	mir-7779	dma-mir-7779	UUUGUGUUGUCCUGUGUUCA	20
183	mir-7855	dma-mir-7855	CGUGAUCGUCUAGUGGUUAGG	21
184	BANUAM	dma-bantam	GAGAUCAUUGUGAAAGCUGAUU	22
185	mir-BarU9	dma-mir-Bart9	CCUUAAAGGGGGGUACACUG	20
186	mir-D1	dma-mir-D1	UGAGGGUUGGGAAGAGCGGA	20
187	mir-iab-4	dma-mir-iab-4-5p	ACGUAUACUGAAUGUAUCCUG	21
		dma-mir-iab-4-3p	UUACGUAUACUGAAGGUAUACCGGA	25
188	let7	dma-let7a	UGAGGUAGUAGGUUGUAUAG	20
		dma-let7i	CGAGGUAGUAGUUUGUGCUG	20
		dma-let7-3p	CUGUACAACUUGCUAACUUUCC	22
		dma-let7d	AGAGGUAGUAGGUUGCAUAG	20
		dma-let7g	UGAGGUAGUAGUUUGUACAG	20
