# Supplementary material for: Small RNA Sequencing Based Identification of MiRNAs in Daphnia magna
Source: PLoS One. 2015 Sep 14;10(9):e0137617. doi: 10.1371/journal.pone.0137617 (PMC4569176; doi:10.1371/journal.pone.0137617)
Supplement: S3 Table — Data is an expansion of that presented in Table 1. The total number of predicted sequence hits for each species was determined. The percent of conserved miRNA transcripts with D. magna was calculated by dividing the number of homologous miRNAs by the total number of miRNAs identified for each species. (XLSX) [file pone.0137617.s003.xlsx]

## Sheet: Expansion of Table 1
S3 Table. Comparison of putative miRNA sequences from D. magna with available miRNAs.
Species	Total number of predicted miRNAs	Number conserved with D. magna	% conserved with D. magna *	*(Number conserved with D. magna /Total number of predicted miRNAs)
Apis mellifera	222	37	16.6667
Pristionchus pacificus	99	10	10.101
Petromyzon marinus	302	45	14.9007
Gallus gallus	996	52	5.22088
Panagrellus redivivus	394	13	3.29949
Saguinus labiatus	40	18	45
Paralichthys olivaceus	38	9	23.6842
Drosophila erecta	78	32	41.0256
Culex quinquefasciatus	93	30	32.2581
Schmidtea mediterranea	257	11	4.28016
Schistosoma mansoni	29	1	3.44828
Schistosoma japonicum	78	2	2.5641
Lagothrix lagotricha	45	20	44.4444
Drosophila ananassae	75	32	42.6667
Drosophila persimilis	69	31	44.9275
Manduca sexta	89	33	37.0787
Fugu rubripes	108	45	41.6667
Epstein Barr	44	1	2.27273
Artibeus jamaicensis	19	4	21.0526
Ixodes scapularis	49	27	55.102
Tetraodon nigroviridis	109	45	41.2844
Heliconius melpomene	97	27	27.8351
Nasonia giraulti	32	19	59.375
Pongo pygmaeus	653	84	12.8637
Tetranychus urticae	92	21	22.8261
Homo sapiens	2578	105	4.07292
Saccoglossus kowalevskii	115	23	20
Locusta migratoria	14	10	71.4286
Xenopus laevis	21	6	28.5714
Acyrthosiphon pisum	103	26	25.2427
Drosophila grimshawi	72	34	47.2222
Hevea brasiliensis	28	1	3.57143
Strigamia maritima	4	1	25
Macaca mulatta	912	87	9.53947
Drosophila willistoni	72	34	47.2222
Macaca nemestrina	70	28	40
Hippoglossus hippoglossus	37	8	21.6216
Drosophila sechellia	76	32	42.1053
Glycine max	554	1	0.180505
Lottia gigantea	64	30	46.875
Aedes aegypti	124	37	29.8387
Drosophila mojavensis	71	32	45.0704
Daphnia pulex	45	41	91.1111
Xenoturbella bocki	8	4	50
Ciona intestinalis	550	10	1.81818
Branchiostoma floridae	187	26	13.9037
Echinococcus multilocularis	22	2	9.09091
Canis familiaris	291	72	24.7423
Sarcophilus harrisii	64	14	21.875
Ictalurus punctatus	205	56	27.3171
Nasonia longicornis	28	21	75
Ovis aries	153	24	15.6863
Caenorhabditis elegans	368	14	3.80435
Ascaris suum	189	22	11.6402
Capitella teleta	134	29	21.6418
Populus euphratica	4	1	25
Tribolium castaneum	430	50	11.6279
Nematostella vectensis	78	1	1.28205
Caenorhabditis briggsae	165	13	7.87879
Caenorhabditis brenneri	152	13	8.55263
Echinococcus granulosus	26	2	7.69231
Branchiostoma belcheri	173	25	14.4509
Rattus norvegicus	728	84	11.5385
Mus musculus	1908	90	4.71698
Pan paniscus	83	35	42.1687
Drosophila pseudoobscura	273	39	14.2857
Xenopus tropicalis	175	61	34.8571
Taeniopygia guttata	334	45	13.4731
Anopheles gambiae	65	29	44.6154
Ciona savignyi	25	5	20
Lemur catta	15	7	46.6667
Equus caballus	360	67	18.6111
Arabidopsis thaliana	337	1	0.296736
Nasonia vitripennis	53	33	62.2642
Ateles geoffroyi	54	22	40.7407
Haemonchus contortus	194	14	7.21649
Oryzias latipes	146	33	22.6027
Strongylocentrotus purpuratus	70	20	28.5714
Ornithorhynchus anatinus	640	53	8.28125
Cricetulus griseus	307	63	20.5212
Caenorhabditis remanei	182	15	8.24176
Drosophila virilis	74	32	43.2432
Oikopleura dioica	63	3	4.7619
Danio rerio	255	66	25.8824
Brugia malayi	108	18	16.6667
Drosophila simulans	178	39	21.9101
Drosophila melanogaster	426	45	10.5634
Cyprinus carpio	146	49	33.5616
Bombyx mori	567	40	7.05467
Sus scrofa	326	67	20.5521
Bos taurus	783	82	10.4725
Drosophila yakuba	75	31	41.3333
Anolis carolinensis	416	52	12.5
Pan troglodytes	582	77	13.2302
Monodelphis domestica	767	57	7.43155
Gorilla gorilla	317	73	23.0284
