# Supplementary material for: Small RNA Sequencing Based Identification of MiRNAs in Daphnia magna
Source: PLoS One. 2015 Sep 14;10(9):e0137617. doi: 10.1371/journal.pone.0137617 (PMC4569176; doi:10.1371/journal.pone.0137617)
Supplement: S6 Table — miRNA families with homologous predicted sequence hits were compared for their presence in Homo sapiens, Mus musculus, Drosophila melanogaster, and Caenorhabditis elegans. A predicted miRNA family member found in D. magna and one of the four model species is indicated with a green “√” sign; a red “X” indicates that a homolog for the putative D. magna miRNA was not found in that species. (XLSX) [file pone.0137617.s006.xlsx]

## Sheet: miRNA Families
S6 Table. Comparison of miRNA family members between D. magna and other model species.
Predicted miRNA Name	Homo sapiens	Mus musculus	Drosophila melanogaster	Caenorhabditis elegans
mir-1	√	√	X	√
mir-2	X	X	√	√
mir-7	√	√	√	X
mir-8	X	X	√	X
mir-9	√	√	√	X
mir-10	√	√	√	X
mir-12	X	X	√	X
mir-16	√	√	X	X
mir-17	√	√	X	X
mir-21	√	√	X	X
mir-22	√	√	X	X
mir-23	√	√	X	X
mir-24	√	√	X	X
mir-25	√	√	X	X
mir-26	√	√	X	X
mir-27	√	√	X	X
mir-28	√	√	X	X
mir-29	√	√	X	X
mir-30	√	√	X	X
mir-31	X	X	√	X
mir-32	√	√	X	X
mir-33	√	√	X	X
mir-34	X	X	√	√
mir-46	X	X	X	√
mir-50	X	X	X	X
mir-61	X	X	X	X
mir-67	X	X	X	X
mir-71	X	X	X	√
mir-76	X	X	X	X
mir-79	X	X	X	√
mir-81	X	X	X	√
mir-82	X	X	X	√
mir-87	X	X	√	√
mir-92	√	√	√	X
mir-93	√	√	X	X
mir-96	√	√	X	X
mir-98	√	√	X	X
mir-99	√	√	X	X
mir-100	√	√	√	X
mir-103	√	√	X	X
mir-106	√	√	X	X
mir-124	√	√	√	√
mir-125	√	√	√	X
mir-128	√	√	X	X
mir-133	√	√	√	X
mir-137	X	X	√	X
mir-141	√	√	X	X
mir-146	X	X	X	X
mir-148	√	√	X	X
mir-151	√	√	X	X
mir-152	√	√	X	X
mir-153	√	√	X	X
mir-181	√	√	X	X
mir-182	√	√	X	X
mir-183	√	√	X	X
mir-184	√	√	√	X
mir-186	√	√	X	X
mir-191	√	√	X	X
mir-192	√	√	X	X
mir-193	X	X	X	X
mir-194	√	√	X	X
mir-196	√	√	X	X
mir-200	√	√	X	X
mir-203	√	√	X	X
mir-205	X	X	X	X
mir-210	√	√	√	X
mir-216	X	X	X	X
mir-219	X	√	√	X
mir-221	√	√	X	X
mir-222	√	√	X	X
mir-228	X	X	X	X
mir-236	X	X	X	√
mir-251	X	X	X	X
mir-252	X	X	√	√
mir-263	X	X	√	X
mir-275	X	X	√	X
mir-276	X	X	√	X
mir-278	X	X	X	X
mir-279	X	X	X	X
mir-281	X	X	X	X
mir-282	X	X	√	X
mir-283	X	X	√	X
mir-285	X	X	X	X
mir-305	X	X	√	X
mir-315	X	X	√	X
mir-317	X	X	X	X
mir-330	X	X	X	X
mir-340	√	√	X	X
mir-372	√	X	X	X
mir-375	√	√	X	X
mir-378	√	√	X	X
mir-414	X	X	X	X
mir-418	X	X	X	X
mir-421	√	√	X	X
mir-423	√	√	X	X
mir-425	√	√	X	X
mir-429	√	X	X	X
mir-474	X	X	X	X
mir-500	√	X	X	X
mir-509	X	X	X	X
mir-512	X	X	X	X
mir-532	√	√	X	X
mir-589	√	X	X	X
mir-590	√	√	X	X
mir-702	X	X	X	X
mir-716	X	X	X	X
mir-745	X	X	X	X
mir-750	X	X	X	X
mir-753	X	X	X	X
mir-755	X	X	X	X
mir-965	X	X	√	X
mir-981	X	X	√	X
mir-993	X	X	√	X
mir-996	X	X	X	X
mir-998	X	X	X	X
mir-1160	X	X	X	X
mir-1175	X	X	X	X
mir-1180	√	X	X	X
mir-1262	√	X	X	X
mir-1266	√	X	X	X
mir-1307	√	X	X	X
mir-1468	X	X	X	X
mir-1582	X	X	X	X
mir-1692	X	X	X	X
mir-1850	X	X	X	X
mir-2096	X	X	X	X
mir-2137	X	√	X	X
mir-2165	X	X	X	X
mir-2288	X	X	X	X
mir-2325	X	X	X	X
mir-2354	X	X	X	X
mir-2452	X	X	X	X
mir-2462	X	X	X	X
mir-2484	X	X	X	X
mir-2755	X	X	X	X
mir-2916	X	X	X	X
mir-2941	X	X	X	X
mir-3074	√	√	X	X
mir-3179	√	X	X	X
mir-3290	X	X	X	X
mir-3357	X	X	X	X
mir-3428	X	X	X	X
mir-3478	X	X	X	X
mir-3548	X	X	X	X
mir-3553	X	X	X	X
mir-3571	X	X	X	X
mir-3574	X	X	X	X
mir-3583	X	X	X	X
mir-3704	X	X	X	X
mir-3880	X	X	X	X
mir-3968	X	√	X	X
mir-4057	X	X	X	X
mir-4083	X	X	X	X
mir-4171	X	X	X	X
mir-4448	√	X	X	X
mir-4510	√	X	X	X
mir-4542	X	X	X	X
mir-4547	X	X	X	X
mir-4614	X	X	X	X
mir-4664	√	X	X	X
mir-4820	X	X	X	X
mir-4943	X	X	X	X
mir-4949	X	X	√	X
mir-4995	X	X	X	X
mir-5112	X	X	X	X
mir-5347	X	X	X	X
mir-6089	√	X	X	X
mir-6112	X	X	X	X
mir-6173	X	X	X	X
mir-6197	X	X	X	X
mir-6229	X	X	X	X
mir-6240	X	√	X	X
mir-6478	X	X	X	X
mir-6782	X	X	X	X
mir-6830	√	X	X	X
mir-6945	X	X	X	X
mir-7170	X	X	X	X
mir-7373	X	X	X	X
mir-7572	X	X	X	X
mir-7651	X	√	X	X
mir-7685	X	X	X	X
mir-7779	X	X	X	X
mir-7855	X	X	X	X
BANTAM	X	X	√	X
mir-Bart9	X	X	X	X
mir-D1	X	X	X	X
mir-iab-4	X	X	√	X
let7	√	√	√	√
